# Supplementary material for: A novel one-pot synthesis of flavones
Source: Royal Society of Chemistry journal article supplement (doi:10.1039/d1ra00534k), 2021-01-01
Supplement: d1ra00534k1.pdf [file d1ra00534k1.pdf]

# Supporting Information

## A Novel One-pot Synthesis of Flavones

Meng-Yang Chang,<sup>\*a,b</sup> Min-Chen Tsai<sup>a</sup> and Chun-Yi Lin<sup>a</sup>

<sup>a</sup>Department of Medicinal and Applied Chemistry, Kaohsiung Medical University, Kaohsiung 807, Taiwan <sup>b</sup>Department of Medical Research, Kaohsiung Medical University Hospital, Kaohsiung 807, Taiwan

\*Corresponding author, email: [mychang@kmu.edu.tw](mailto:mychang@kmu.edu.tw)

### Table of Contents

|    |                                                                                                    |           |
|----|----------------------------------------------------------------------------------------------------|-----------|
| 1. | <sup>1</sup> H NMR and <sup>13</sup> C NMR spectra copies of compounds <b>4a-4y</b>                | S-2~S-51  |
| 2. | <sup>1</sup> H NMR and <sup>13</sup> C NMR spectra copies of compound <b>3q</b>                    | S-52~S-53 |
| 3. | <sup>1</sup> H NMR and <sup>13</sup> C NMR spectra copies of compounds <b>5a, 6a</b> and <b>7a</b> | S-54~S-59 |
| 4. | X-ray crystal data of compound <b>4t</b>                                                           | S-60~S-61 |

# Compound 4a (<sup>1</sup>H-NMR spectral data)

MC0701

Pulse Sequence: s2pu1  
UNITYplus-400 "unity400"  
Date: Aug 19 2019  
Solvent: CDCl<sub>3</sub>  
Ambient temperature  
Total 32 repetitions

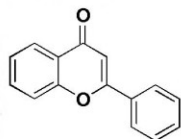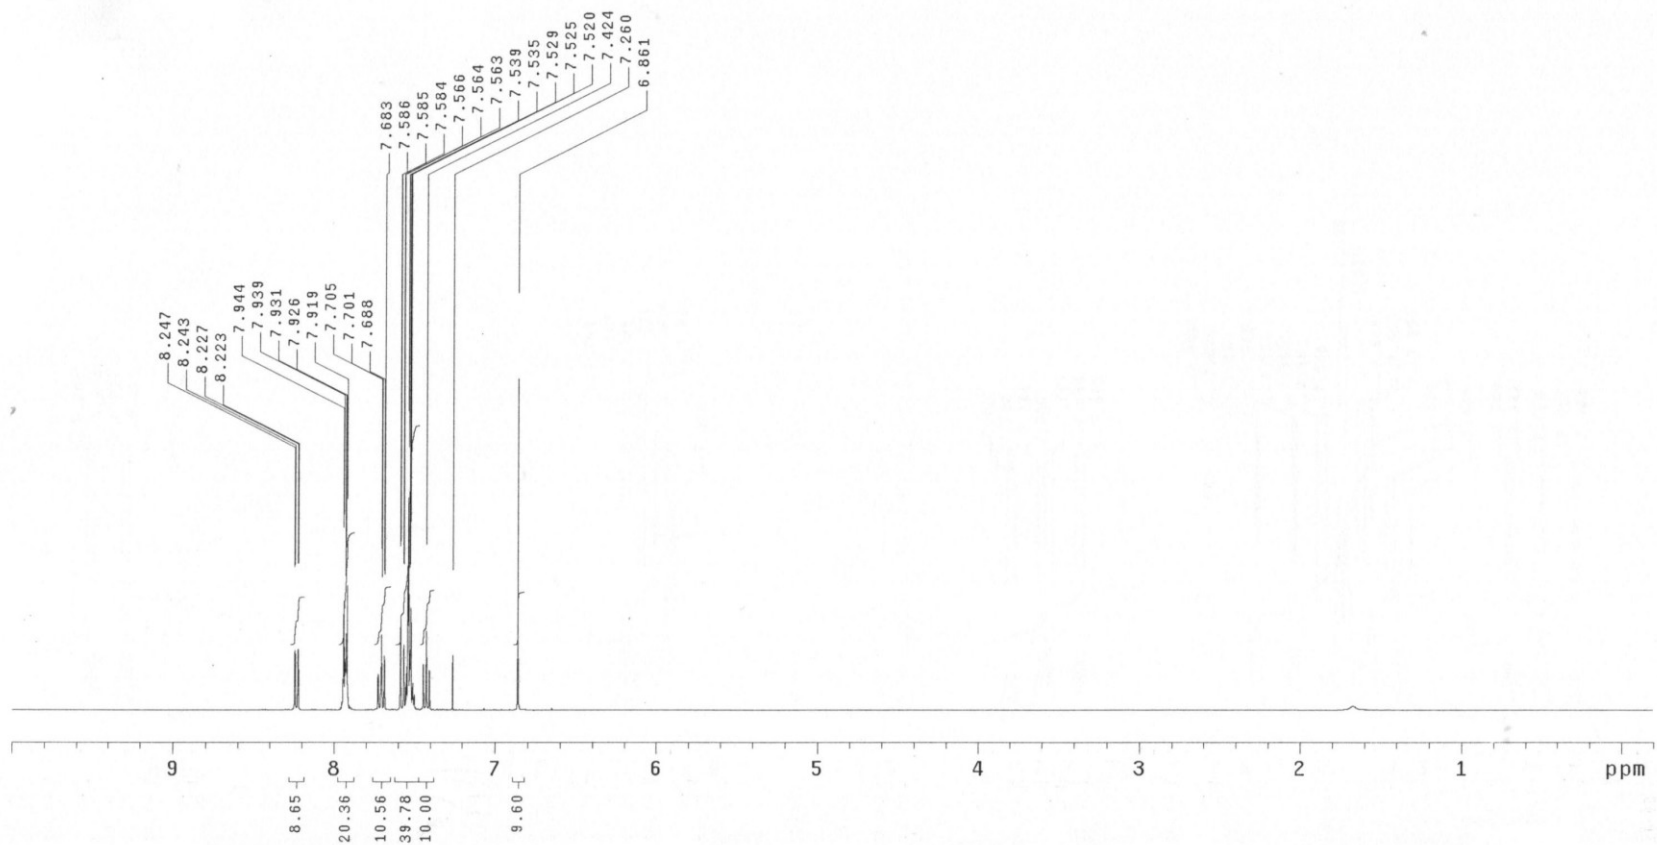

# Compound 4a (<sup>13</sup>C-NMR spectral data)

MC0701

Pulse Sequence: s2pu1  
UNITYplus-400 "unity400"  
Date: Aug 19 2019  
Solvent: CDCl<sub>3</sub>  
Ambient temperature  
Total 1264 repetitions

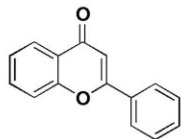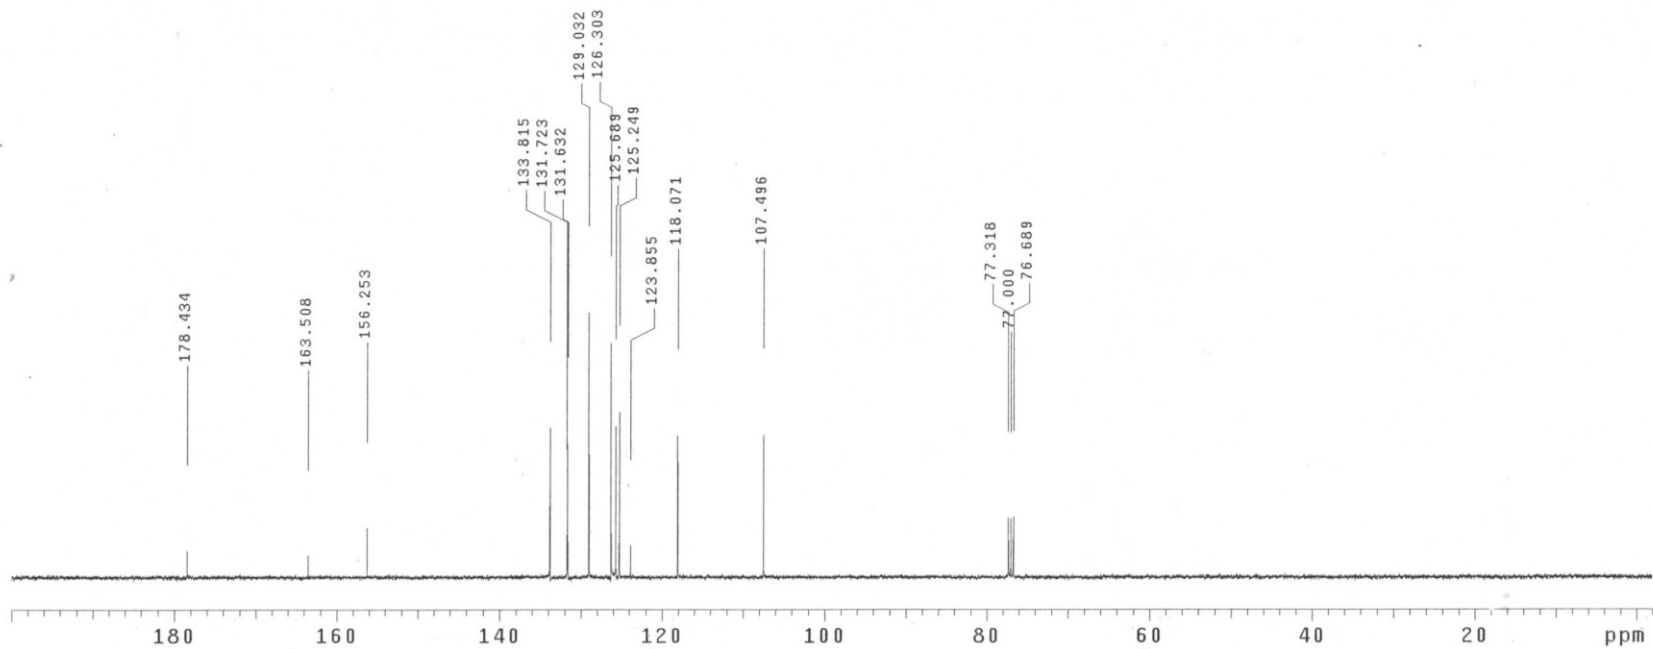

# Compound 4b (<sup>1</sup>H-NMR spectral data)

MC0730

Pulse Sequence: s2pu1

UNITYplus-400 "unity400"

Date: Jul 31 2019

Solvent: CDCl<sub>3</sub>

Ambient temperature

Total 32 repetitions

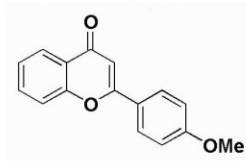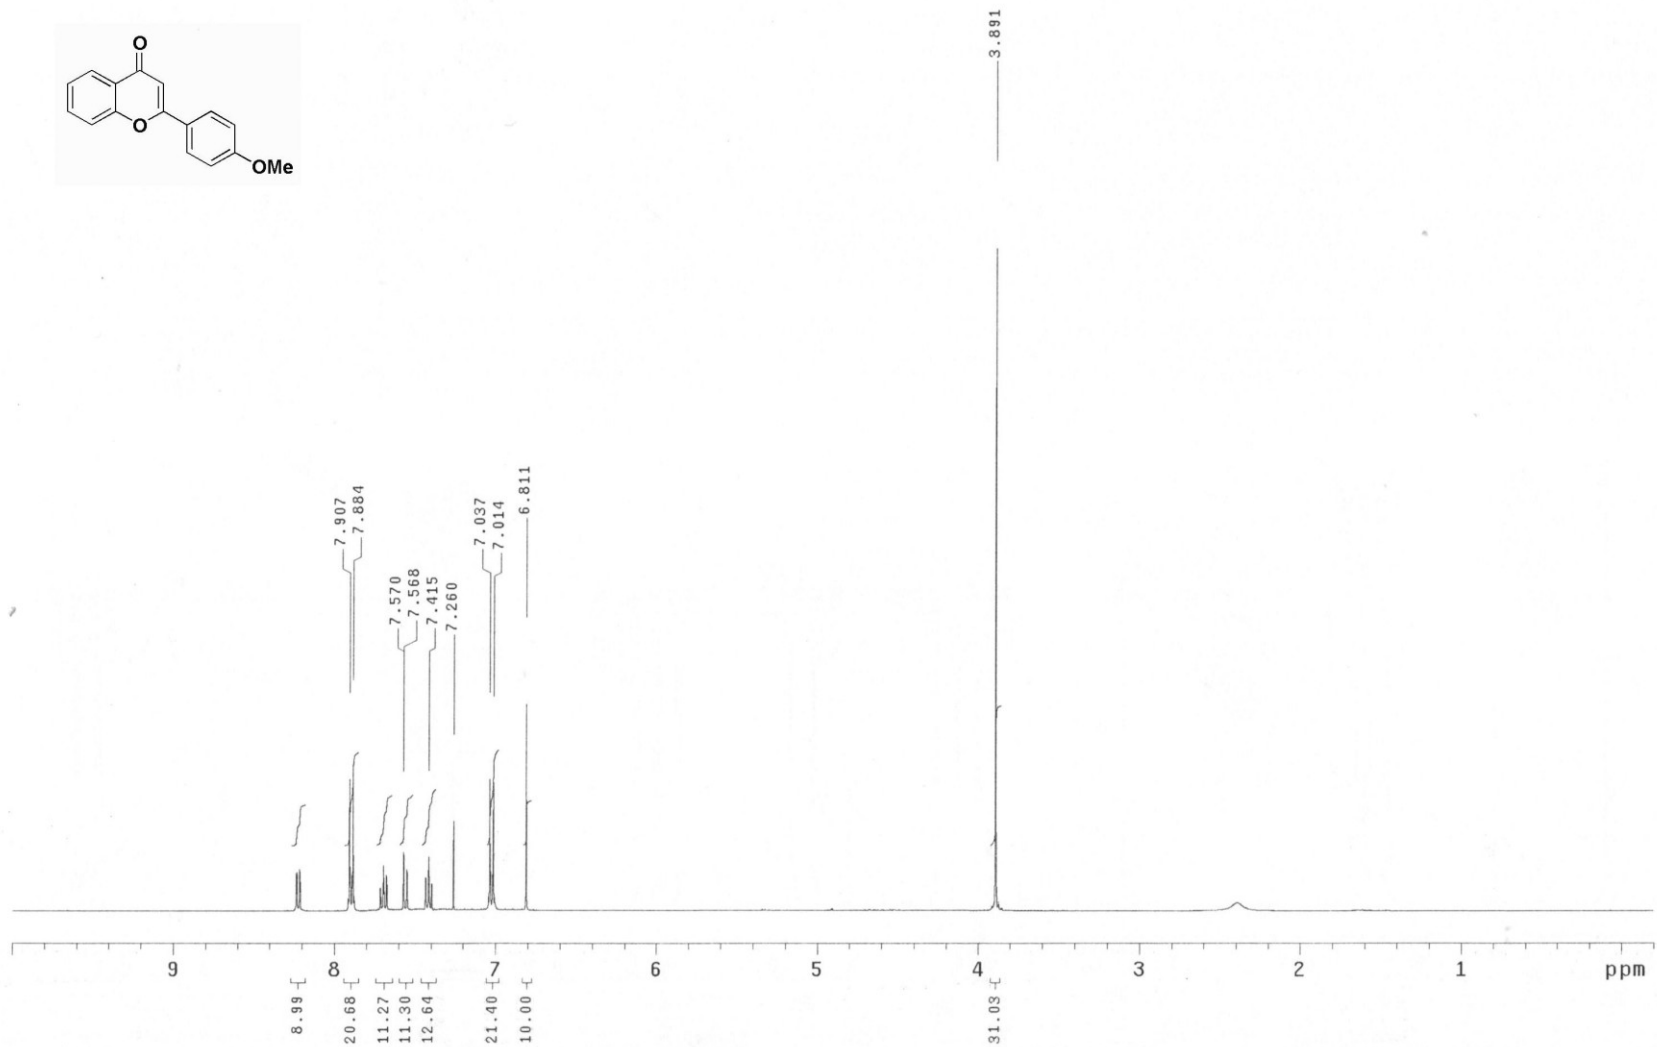

# Compound 4b (<sup>13</sup>C-NMR spectral data)

MC0730

Pulse Sequence: s2pu1  
UNITYplus-400 "unity400"  
Date: Jul 31 2019  
Solvent: CDCl<sub>3</sub>  
Ambient temperature  
Total 1024 repetitions

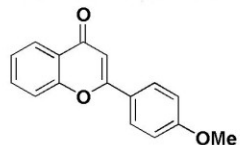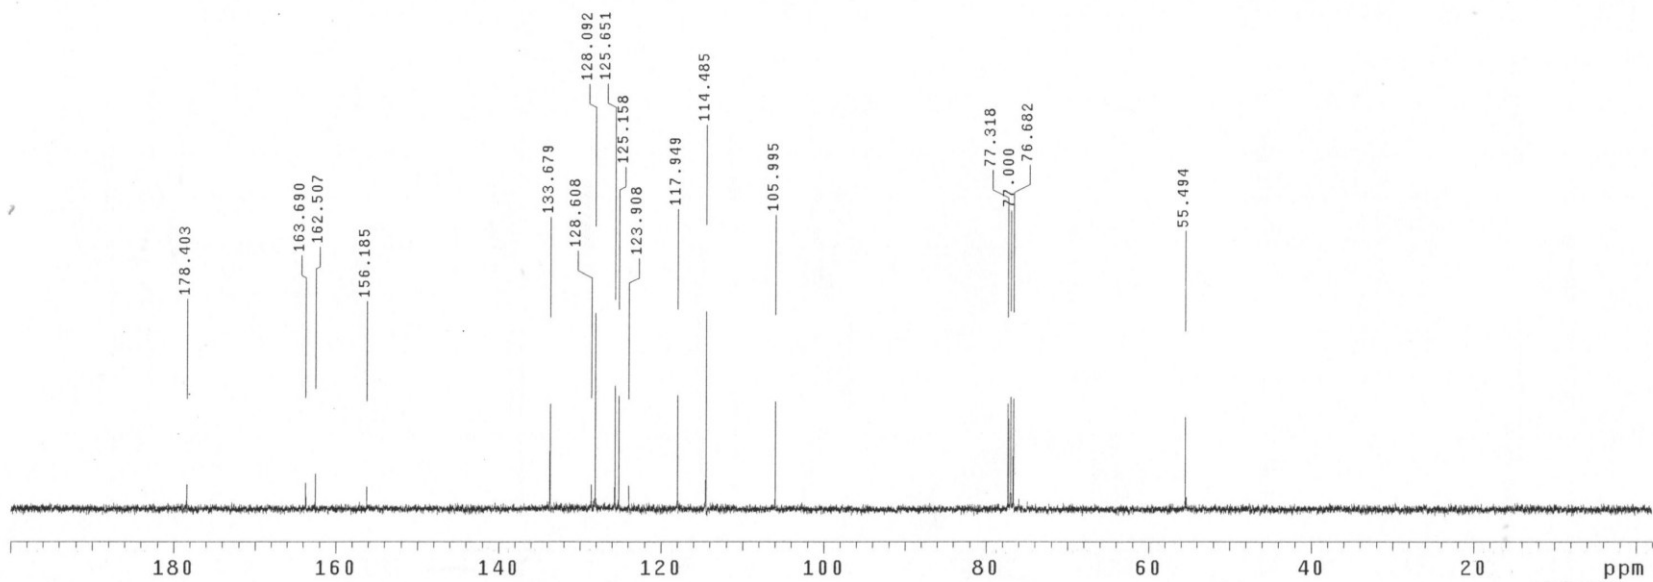

# Compound 4c (<sup>1</sup>H-NMR spectral data)

MC0807

Pulse Sequence: s2pu1  
UNITYplus-400 "unity400"  
Date: Aug 8 2019  
Solvent: CDCl<sub>3</sub>  
Ambient temperature  
Total 32 repetitions

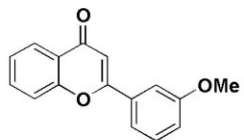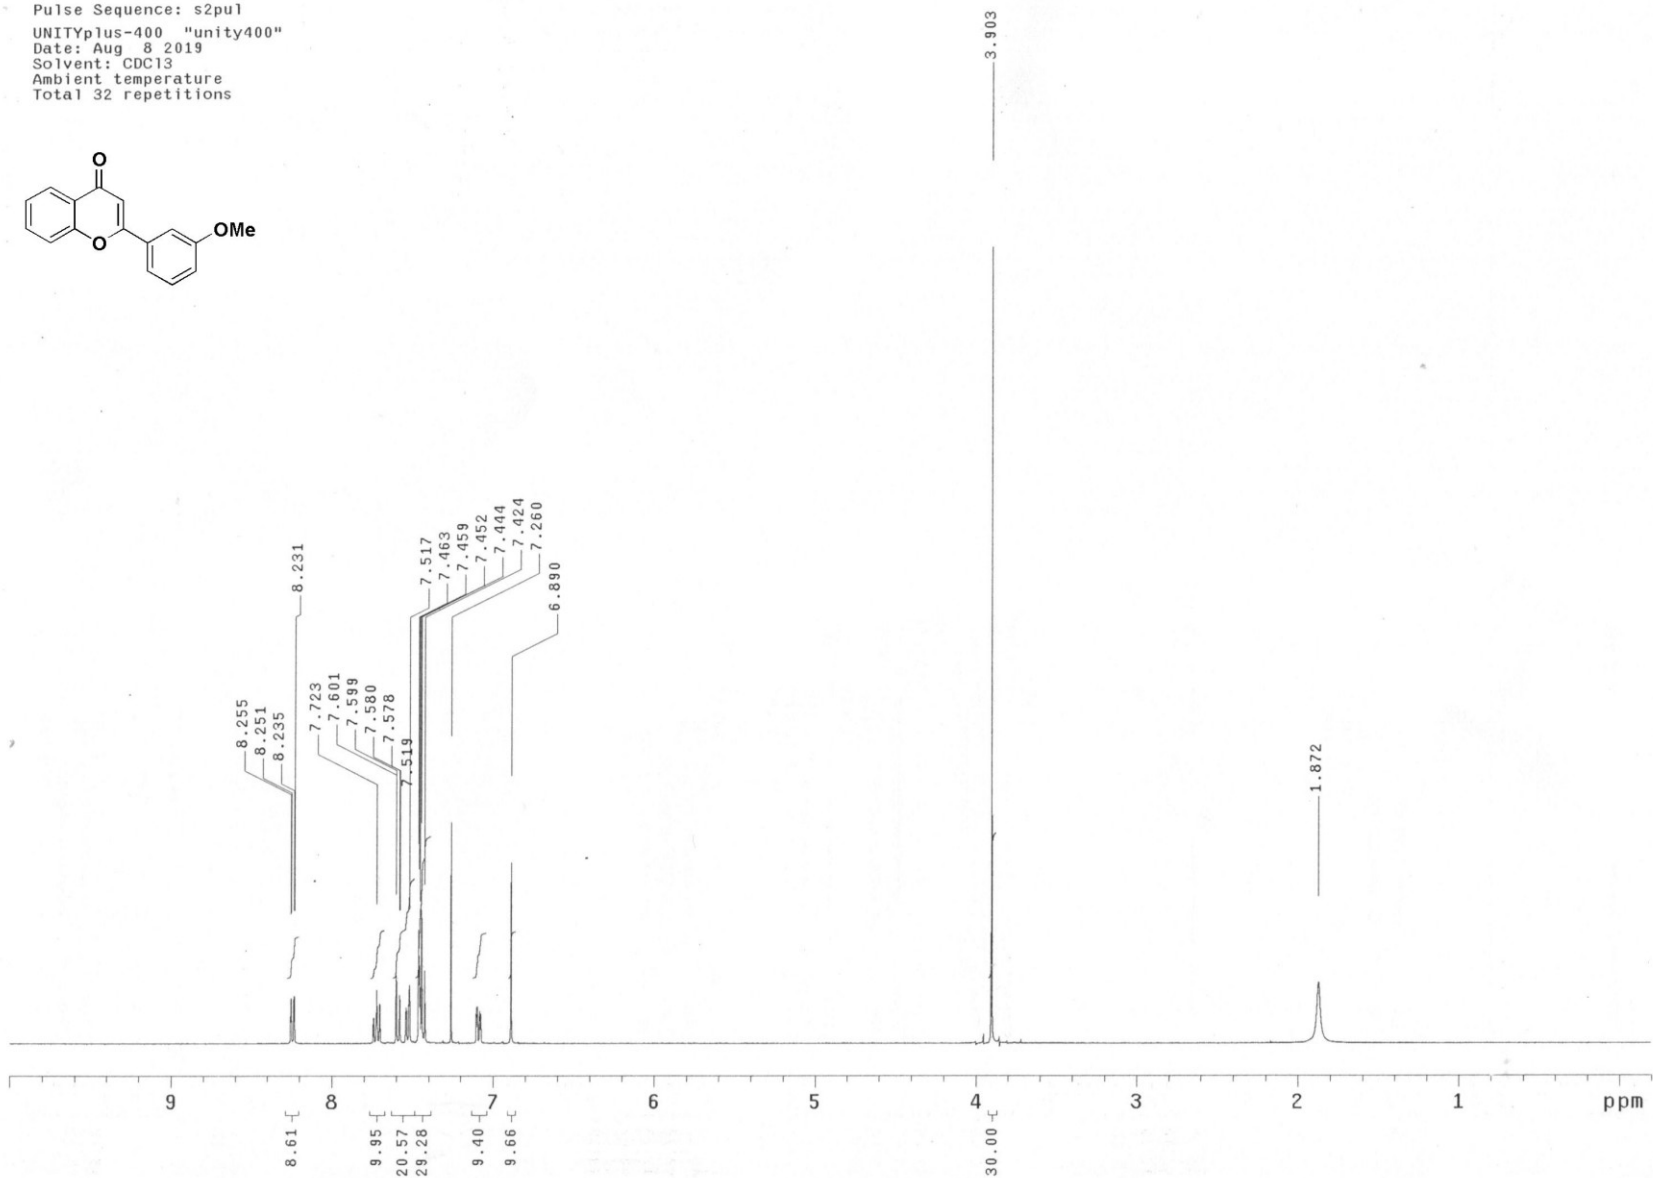

# Compound 4c (<sup>13</sup>C-NMR spectral data)

MC0807

Pulse Sequence: s2pu1  
UNITYplus-400 "unity400"  
Date: Aug 8 2019  
Solvent: CDCl<sub>3</sub>  
Ambient temperature  
Total 8032 repetitions

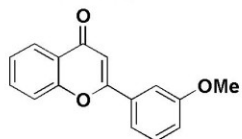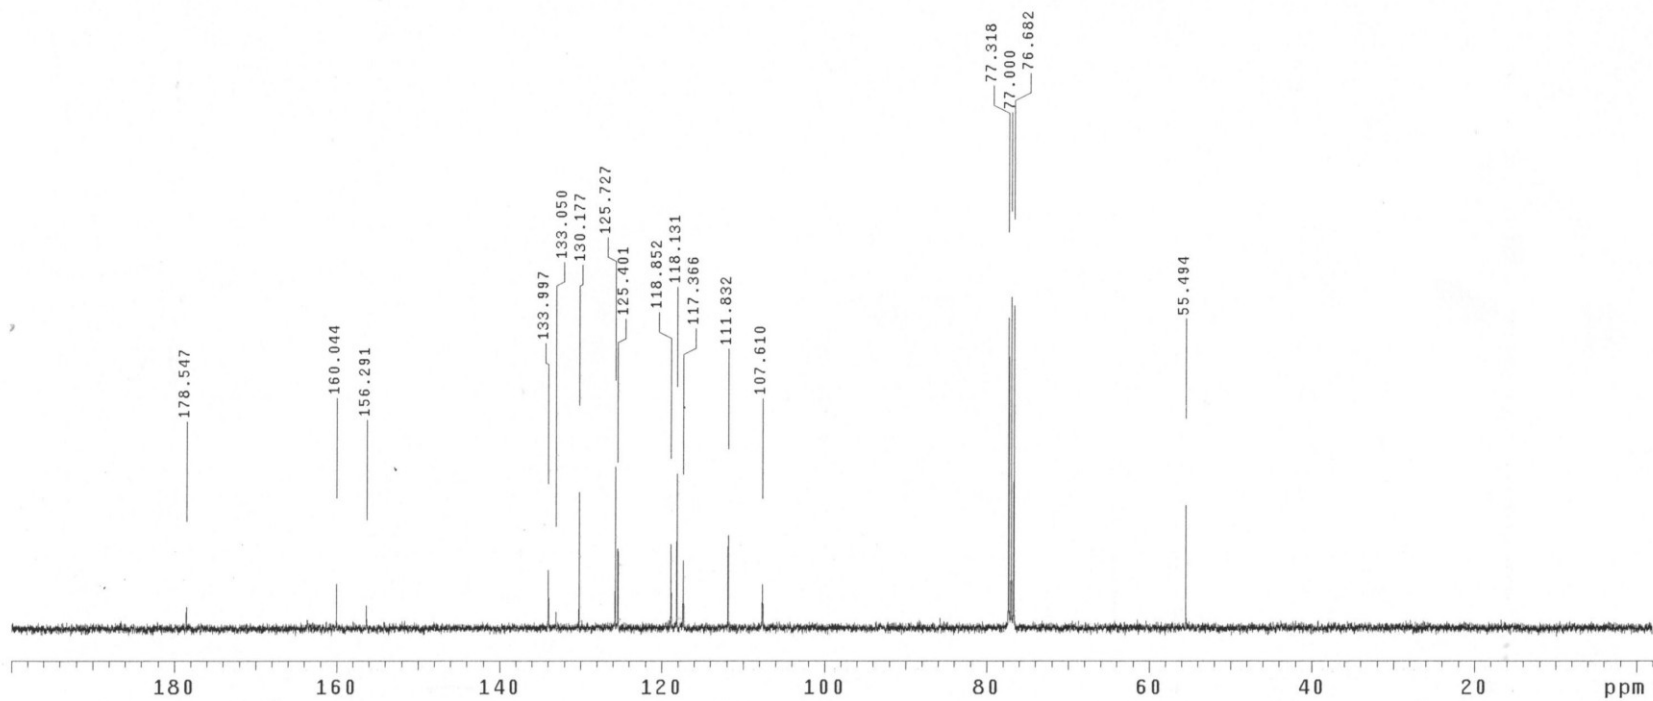

# Compound 4d (<sup>1</sup>H-NMR spectral data)

MC0818

Pulse Sequence: s2pu1

UNITYplus-400 "unity400"

Date: Aug 26 2019

Solvent: CDCl<sub>3</sub>

Ambient temperature

Total 64 repetitions

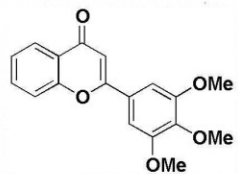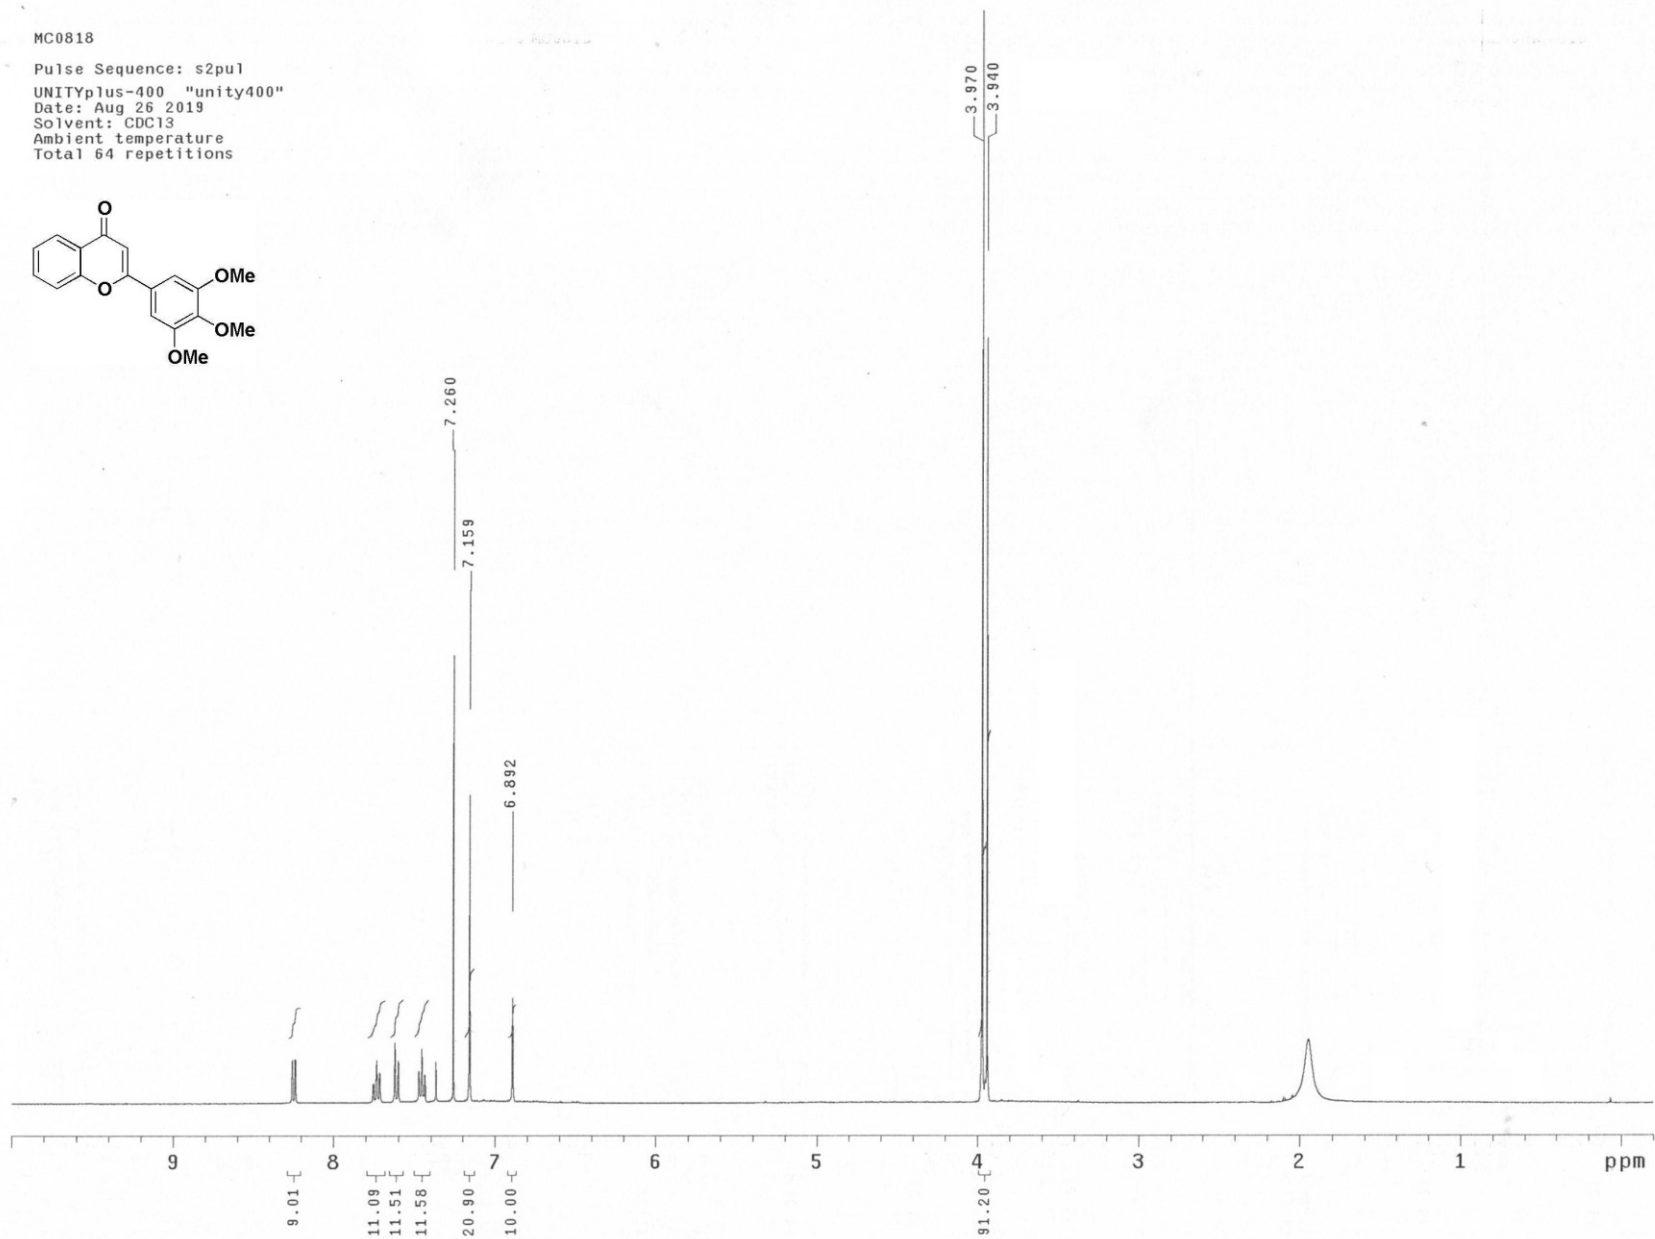



# Compound 4d (<sup>13</sup>C-NMR spectral data)

MC0818

Pulse Sequence: s2pu1

UNITYplus-400 "unity400"

Date: Aug 26 2019

Solvent: CDCl<sub>3</sub>

Ambient temperature

Total 7200 repetitions

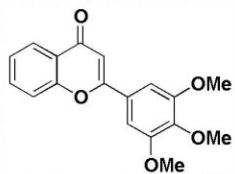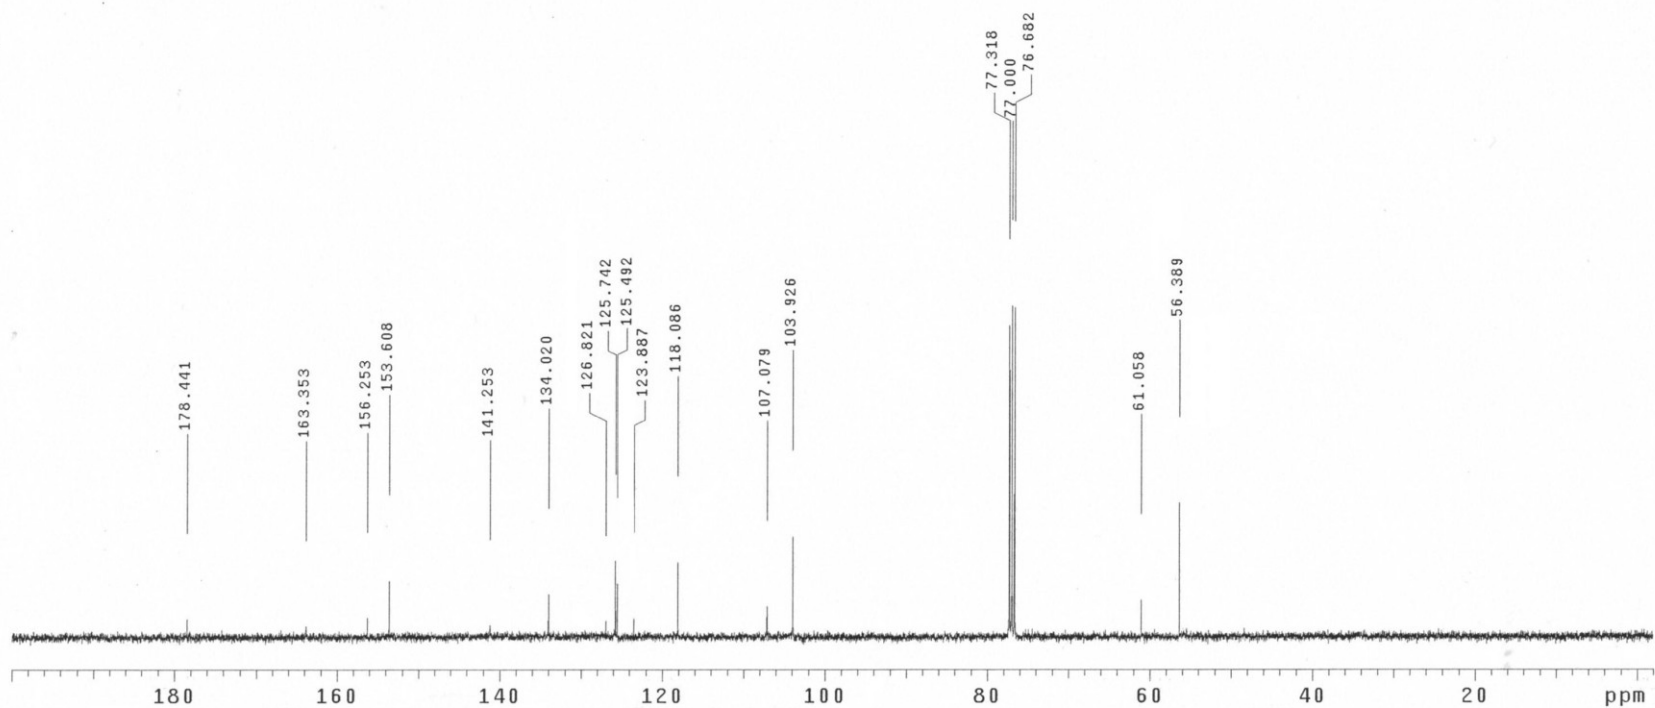

# Compound 4e (<sup>1</sup>H-NMR spectral data)

MC0813

Pulse Sequence: s2pu1  
UNITYplus-400 "unity400"  
Date: Aug 14 2019  
Solvent: CDC13  
Ambient temperature  
Total 32 repetitions

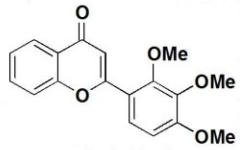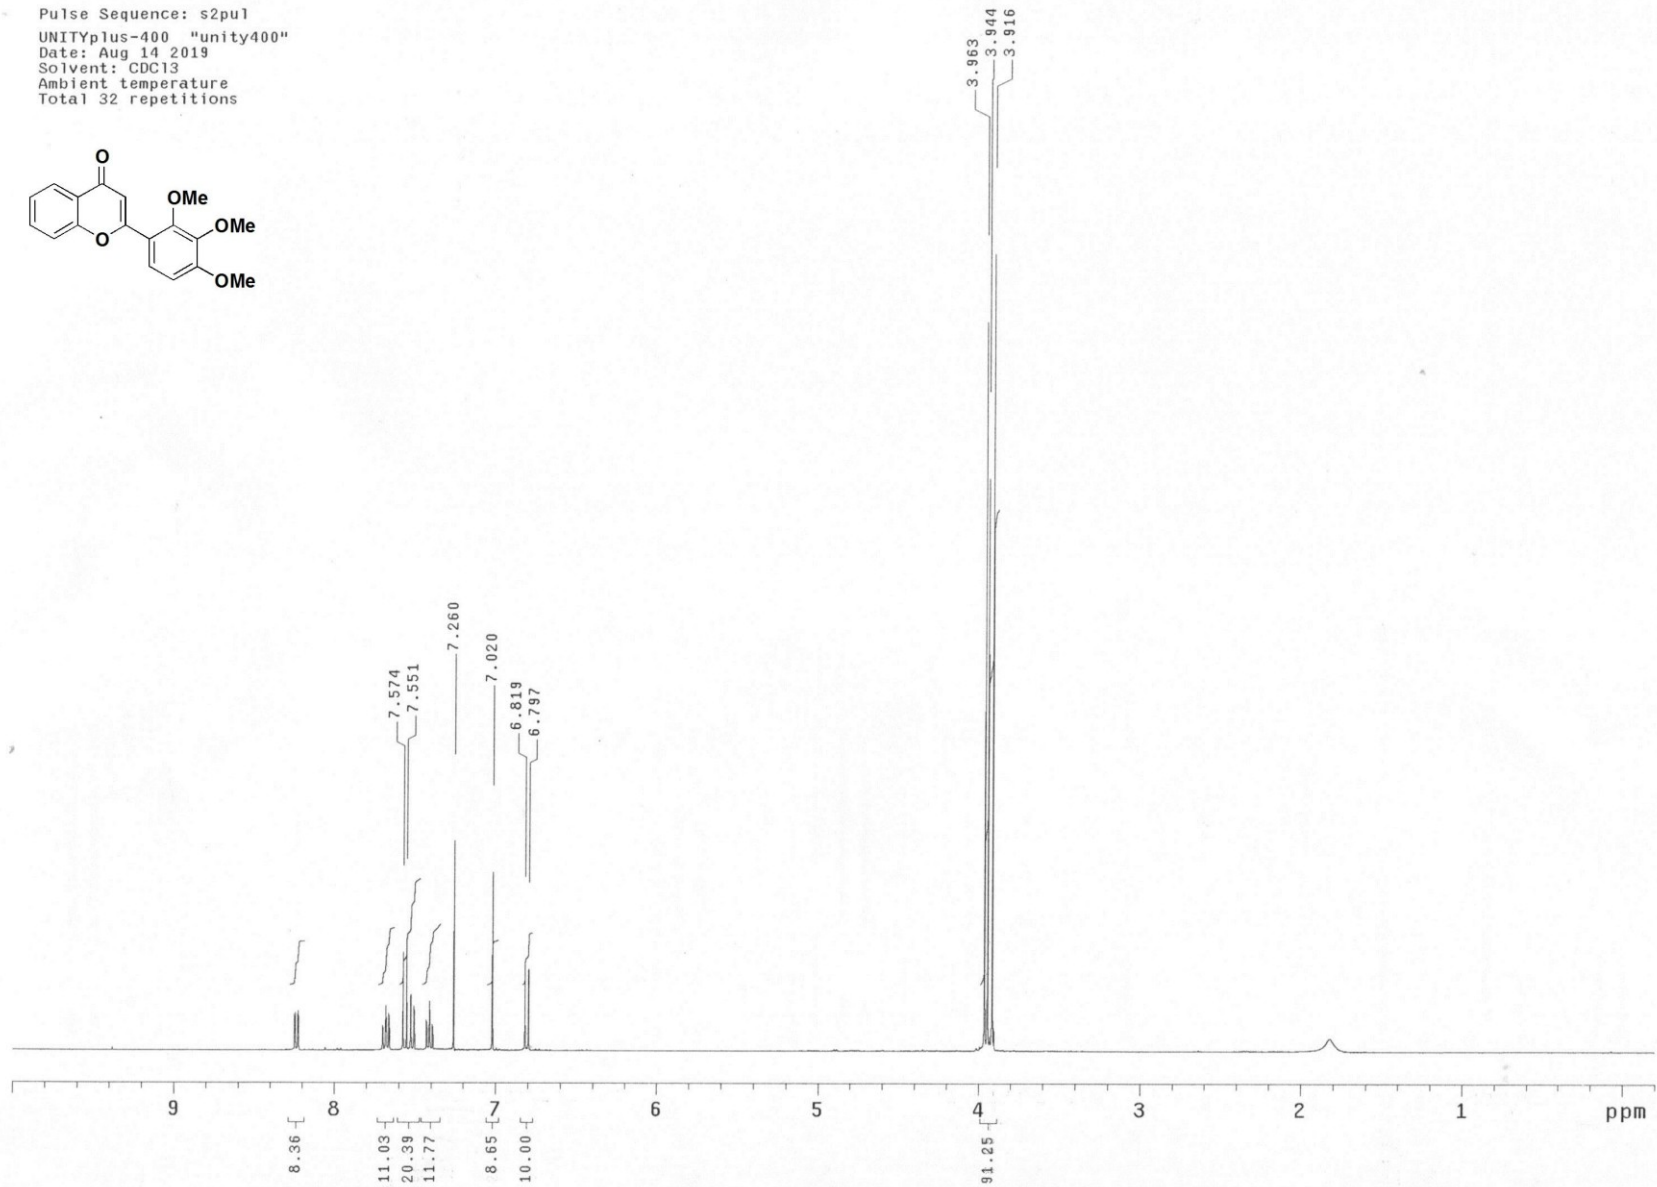

# Compound 4e (<sup>13</sup>C-NMR spectral data)

MC0813

Pulse Sequence: s2pu1  
UNITYplus-400 "unity400"  
Date: Aug 14 2019  
Solvent: CDC13  
Ambient temperature  
Total 4608 repetitions

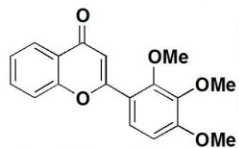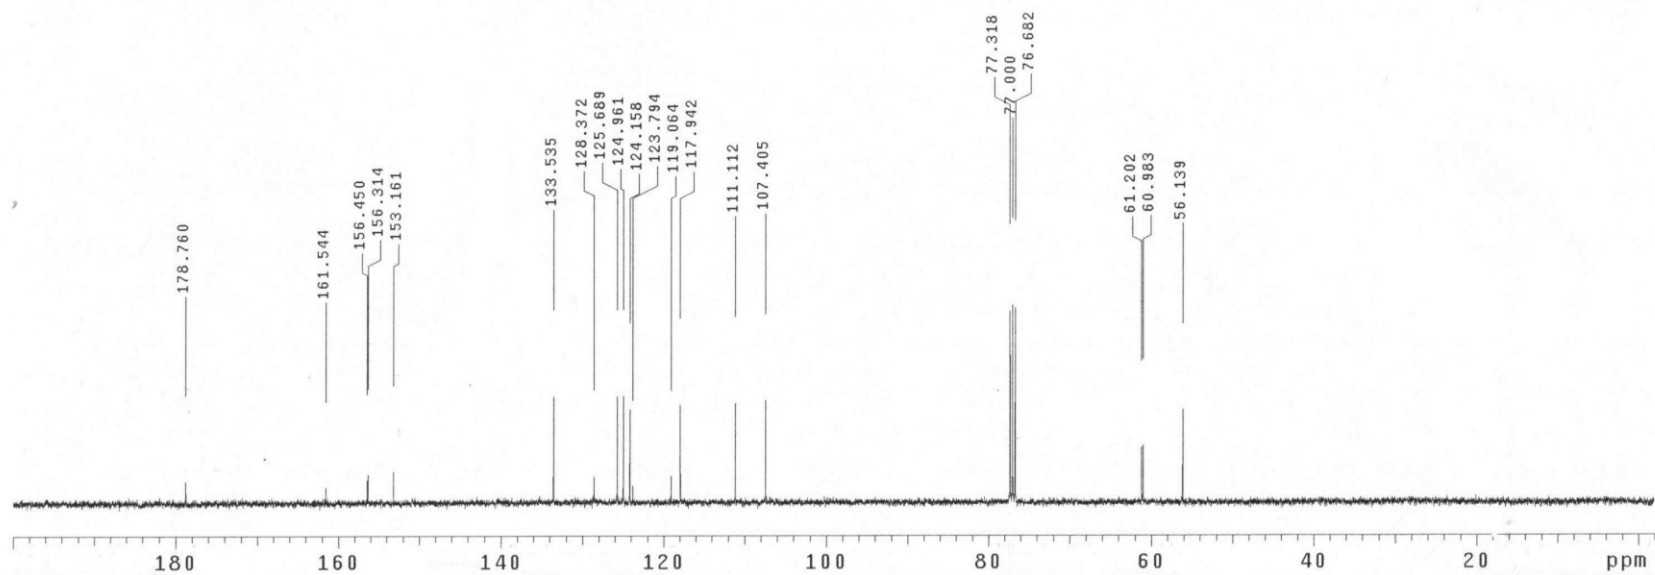

# Compound 4f (<sup>1</sup>H-NMR spectral data)

MC0822

Pulse Sequence: s2pu1

UNITYplus-400 "unity400"

Date: Aug 22 2019

Solvent: CDCl<sub>3</sub>

Ambient temperature

Total 32 repetitions

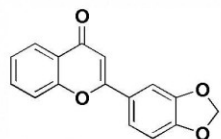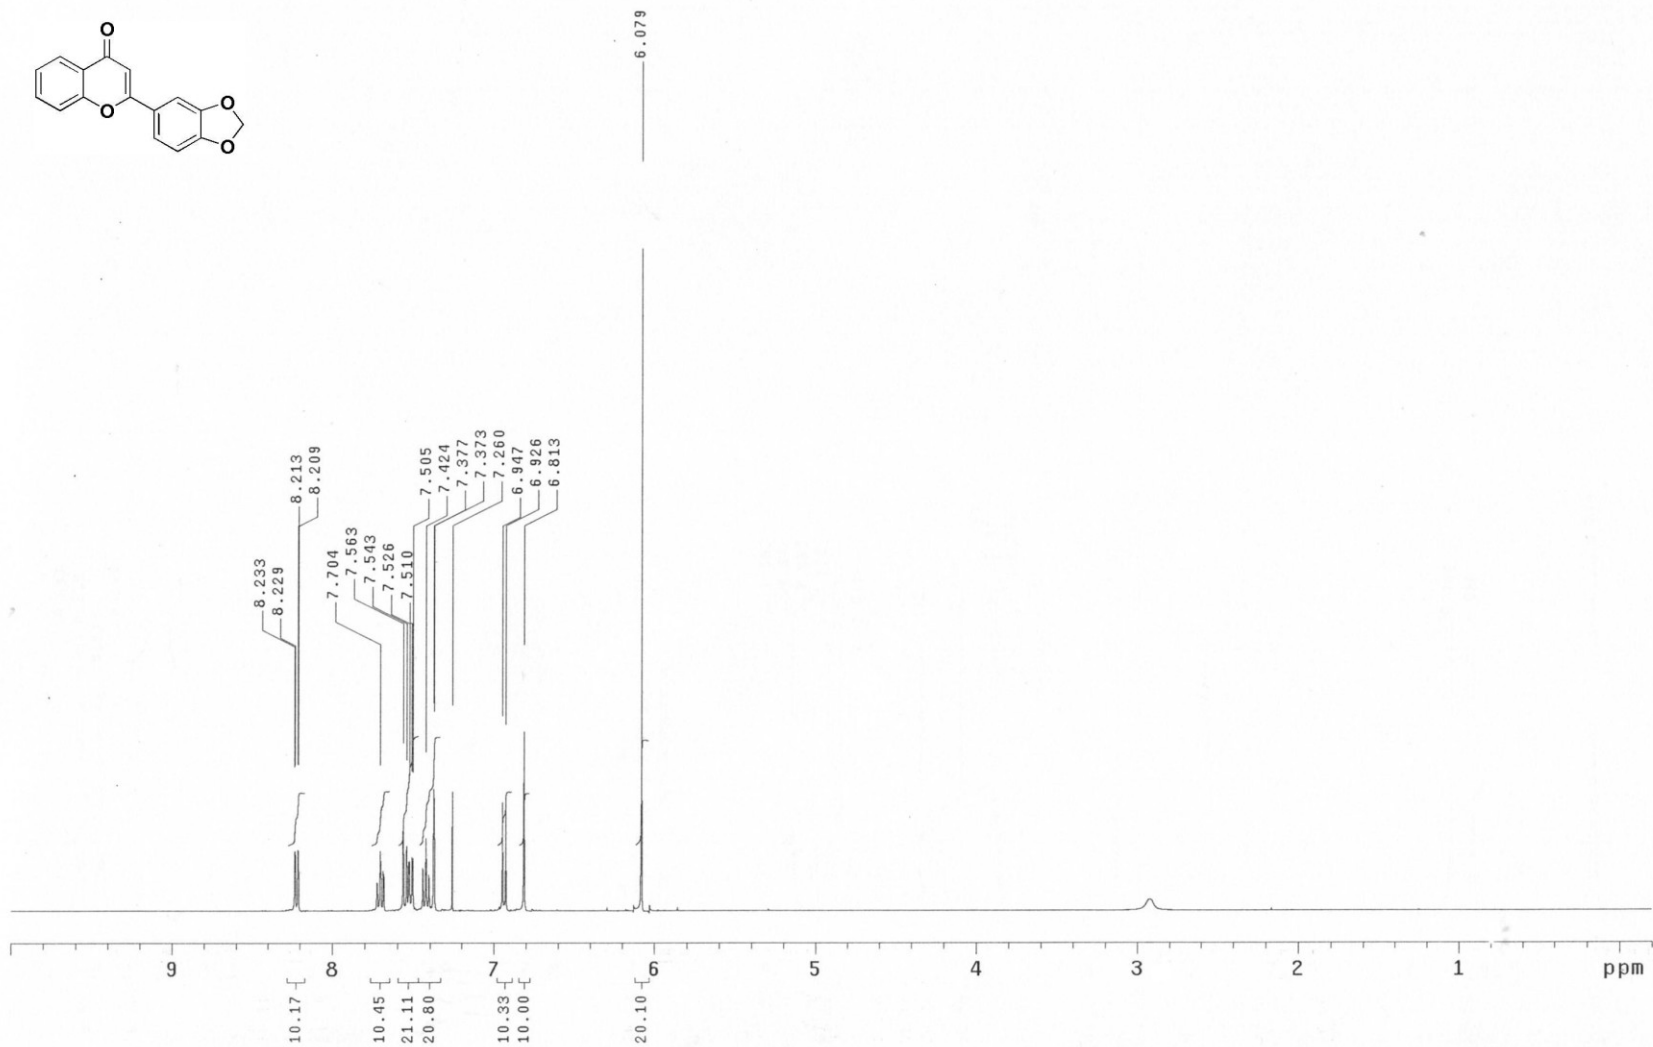

# Compound 4f (<sup>13</sup>C-NMR spectral data)

MC0822

Pulse Sequence: s2pu1  
UNITYplus-400 "unity400"  
Date: Aug 22 2019  
Solvent: CDC13  
Ambient temperature  
Total 2272 repetitions

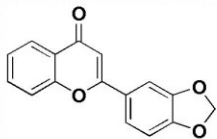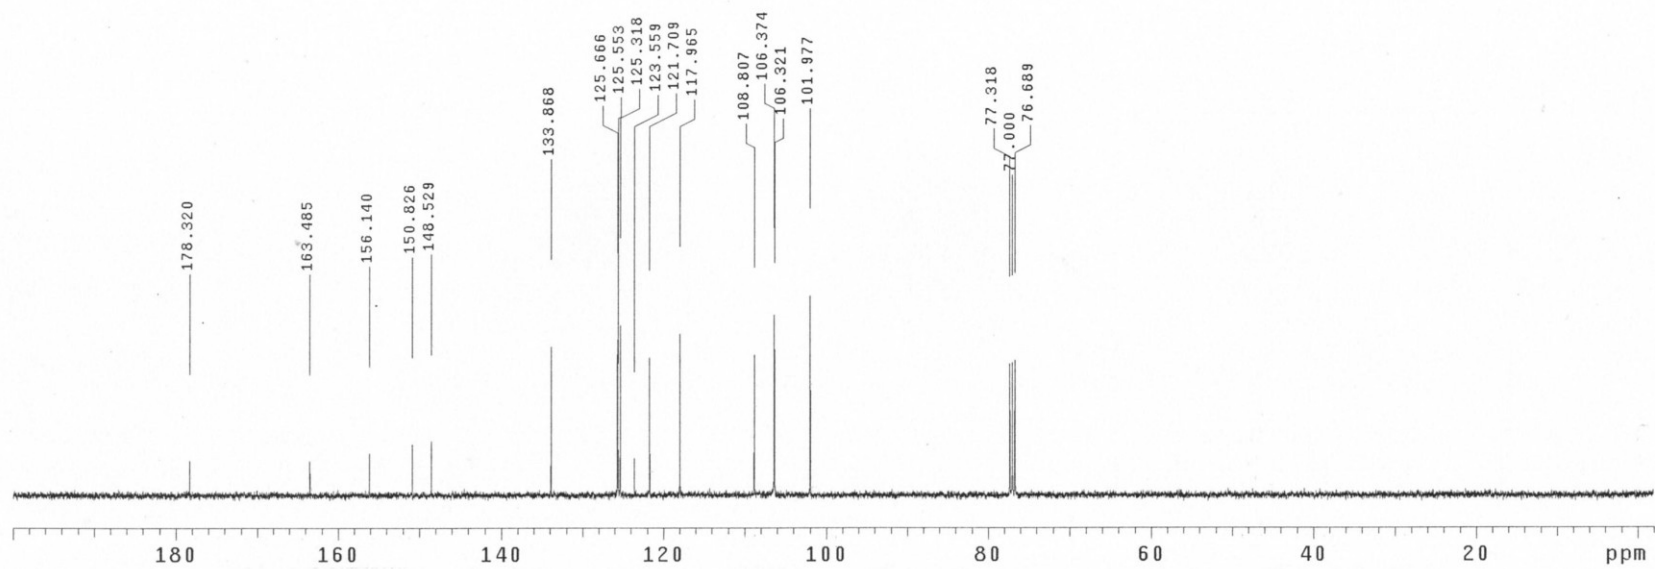

# Compound 4g (<sup>1</sup>H-NMR spectral data)

MC0821

Pulse Sequence: s2pu1

UNITYplus-400 "unity400"

Date: Aug 22 2019

Solvent: CDCl<sub>3</sub>

Ambient temperature

Total 32 repetitions

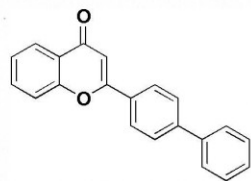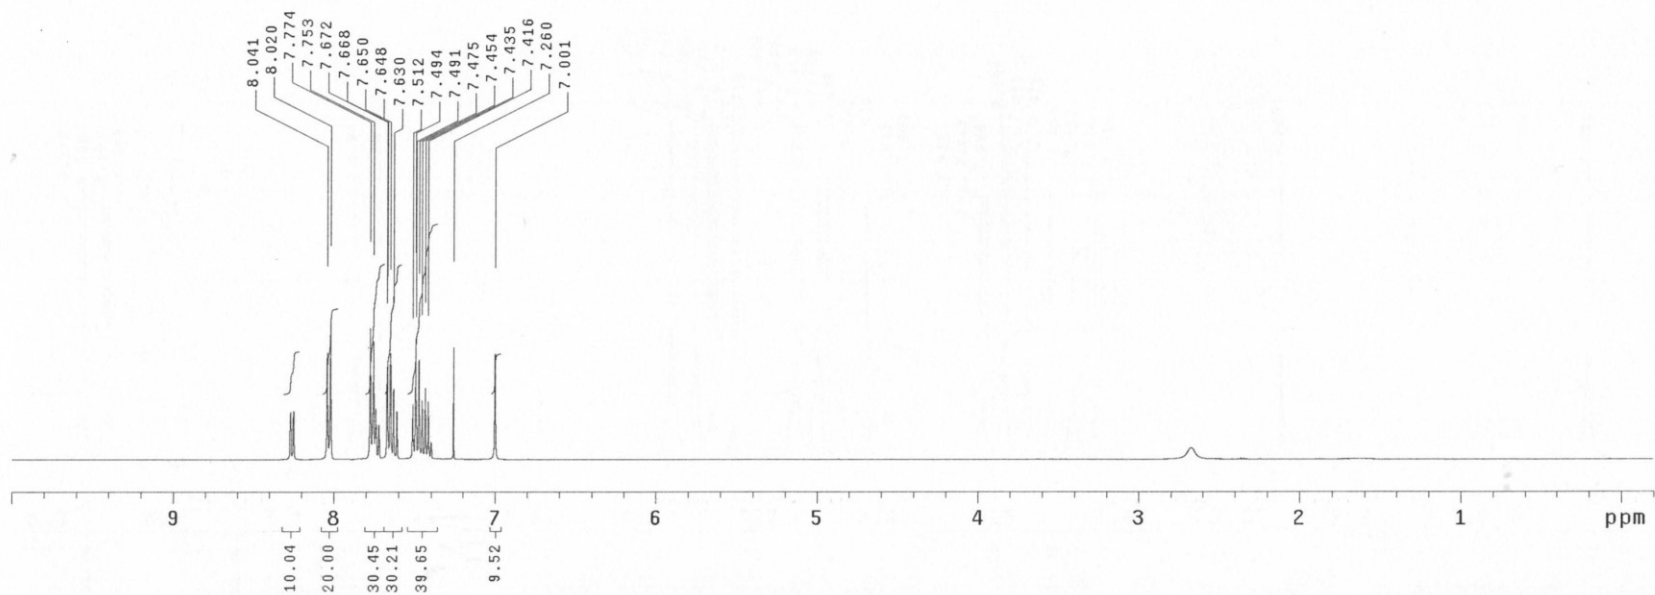

# Compound 4g (<sup>13</sup>C-NMR spectral data)

MC0821

Pulse Sequence: s2pu1

UNITYplus-400 "unity400"

Date: Aug 22 2019

Solvent: CDCl<sub>3</sub>

Ambient temperature

Total 3728 repetitions

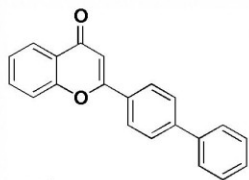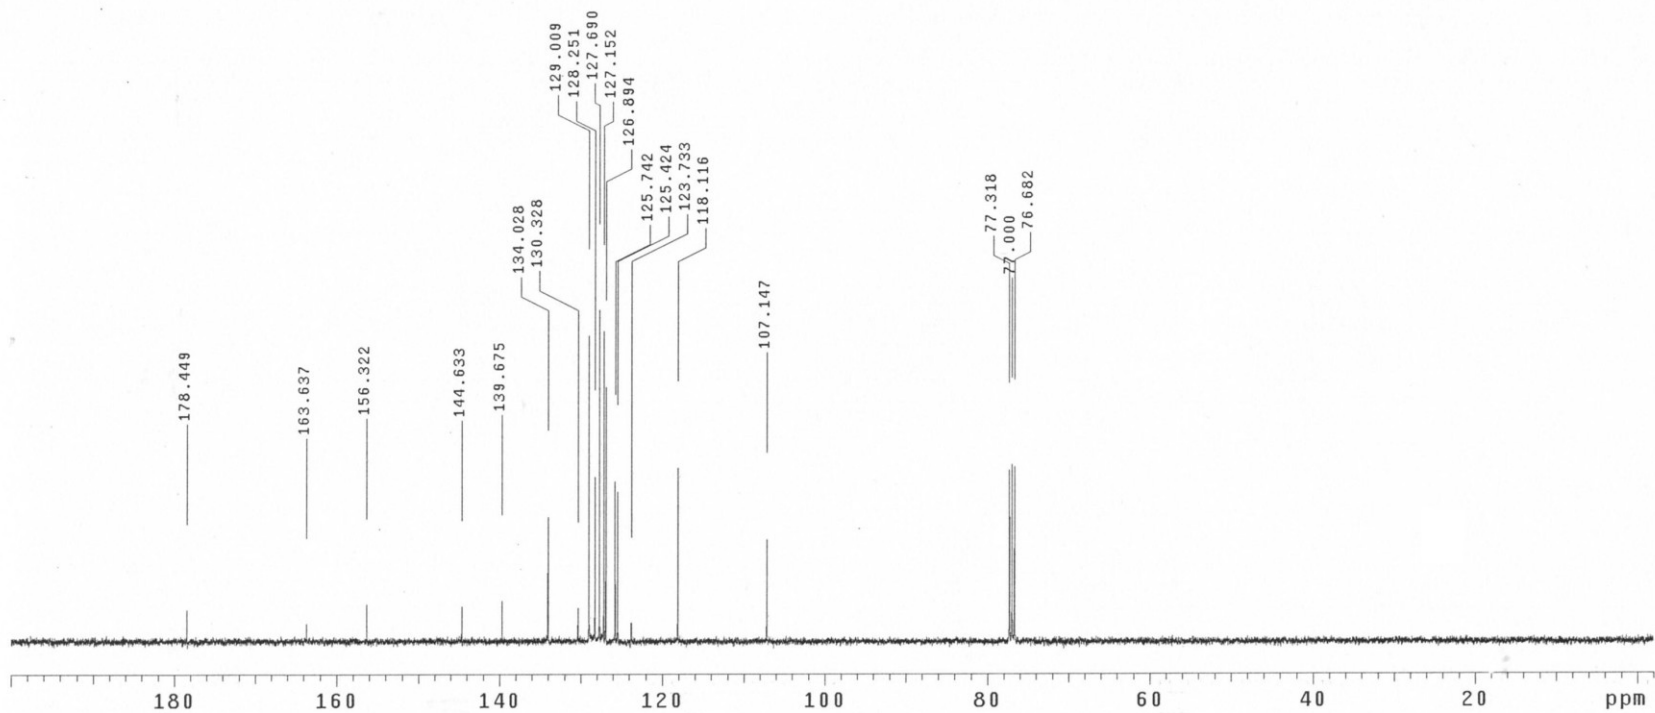

# Compound 4h (<sup>1</sup>H-NMR spectral data)

MC0726

Pulse Sequence: s2pu1  
UNITYplus-400 "unity400"  
Date: Jul 29 2019  
Solvent: CDCl<sub>3</sub>  
Ambient temperature  
Total 32 repetitions

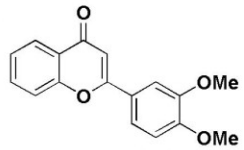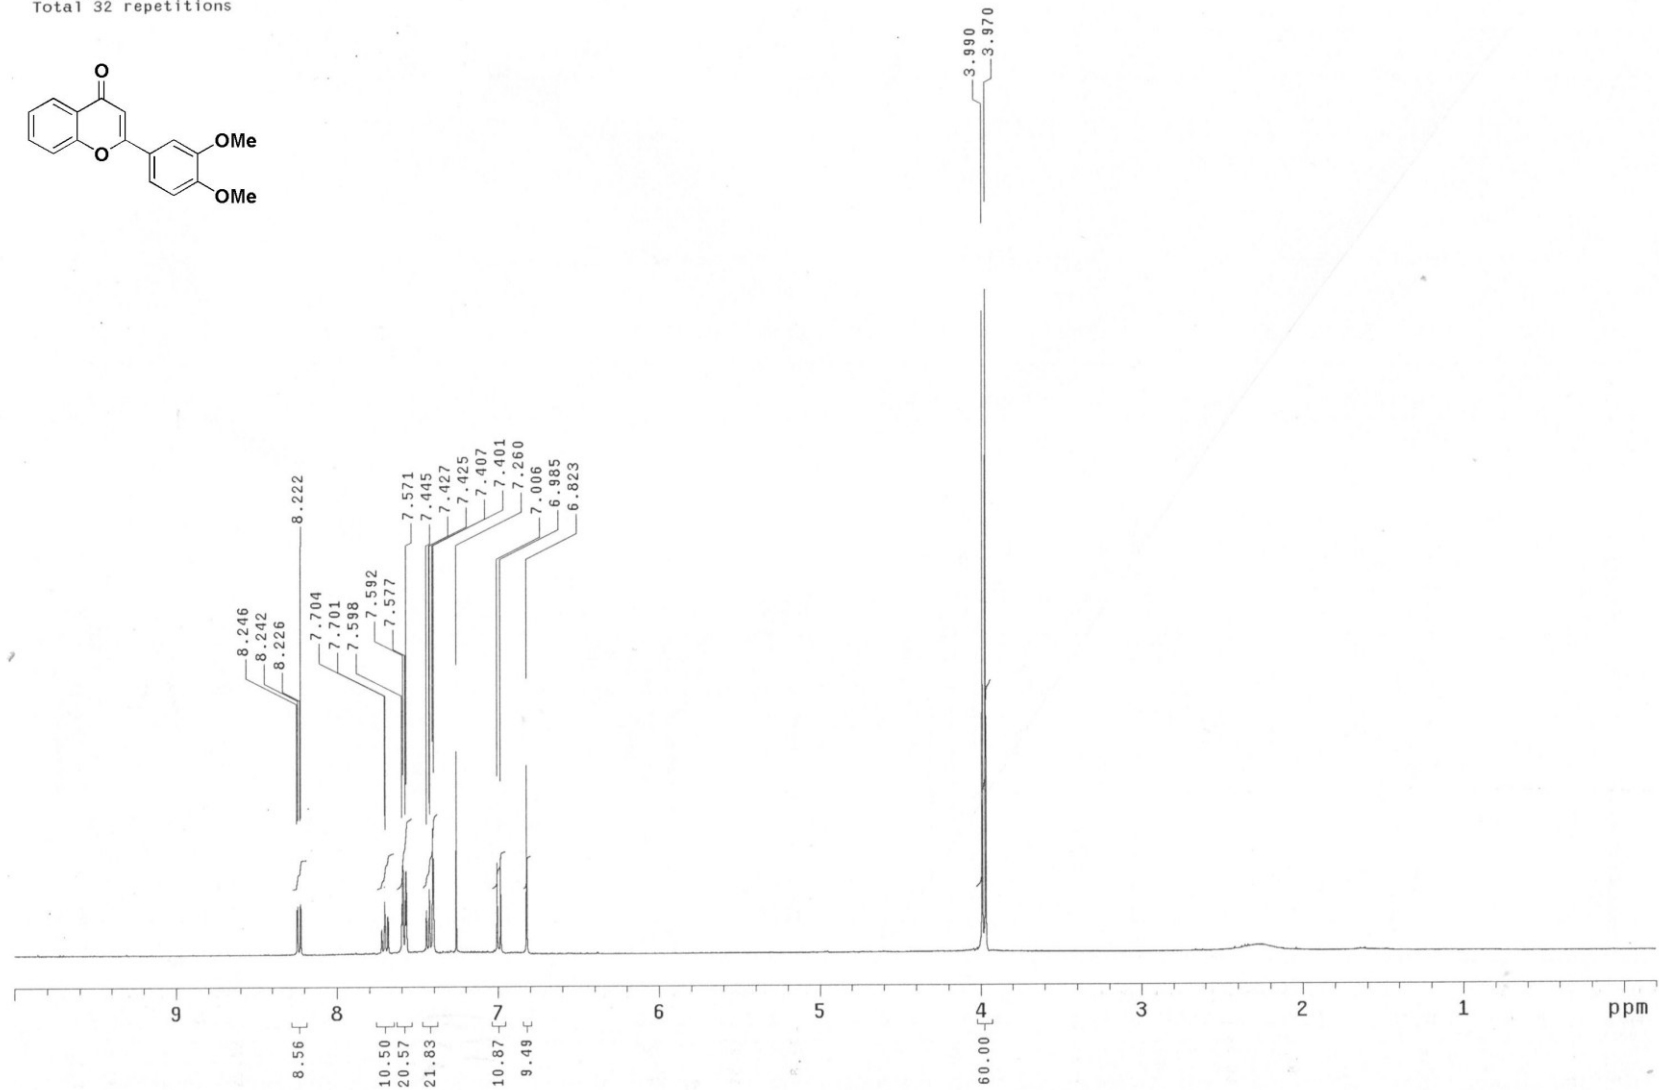



# Compound 4h (<sup>13</sup>C-NMR spectral data)

MC0726

Pulse Sequence: s2pu1

UNITYplus-400 "unity400"

Date: Jul 29 2019

Solvent: CDCl<sub>3</sub>

Ambient temperature

Total 4752 repetitions

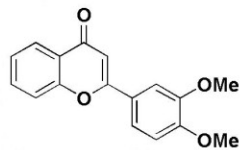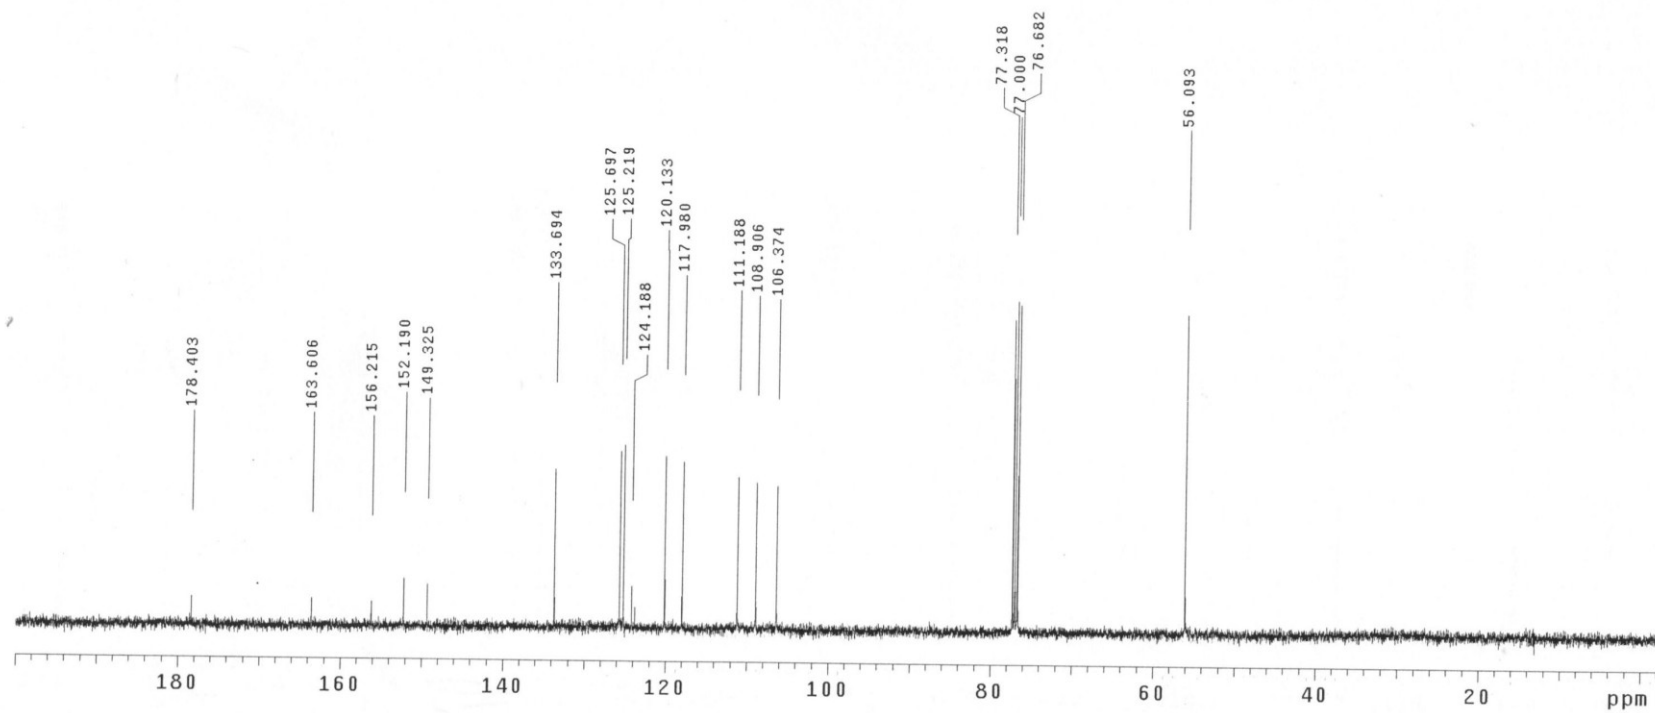

# Compound 4i (<sup>1</sup>H-NMR spectral data)

MC0801

Pulse Sequence: s2pu1  
UNITYplus-400 "unity400"  
Date: Aug 5 2019  
Solvent: CDCl<sub>3</sub>  
Ambient temperature  
Total 32 repetitions

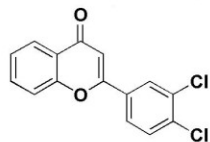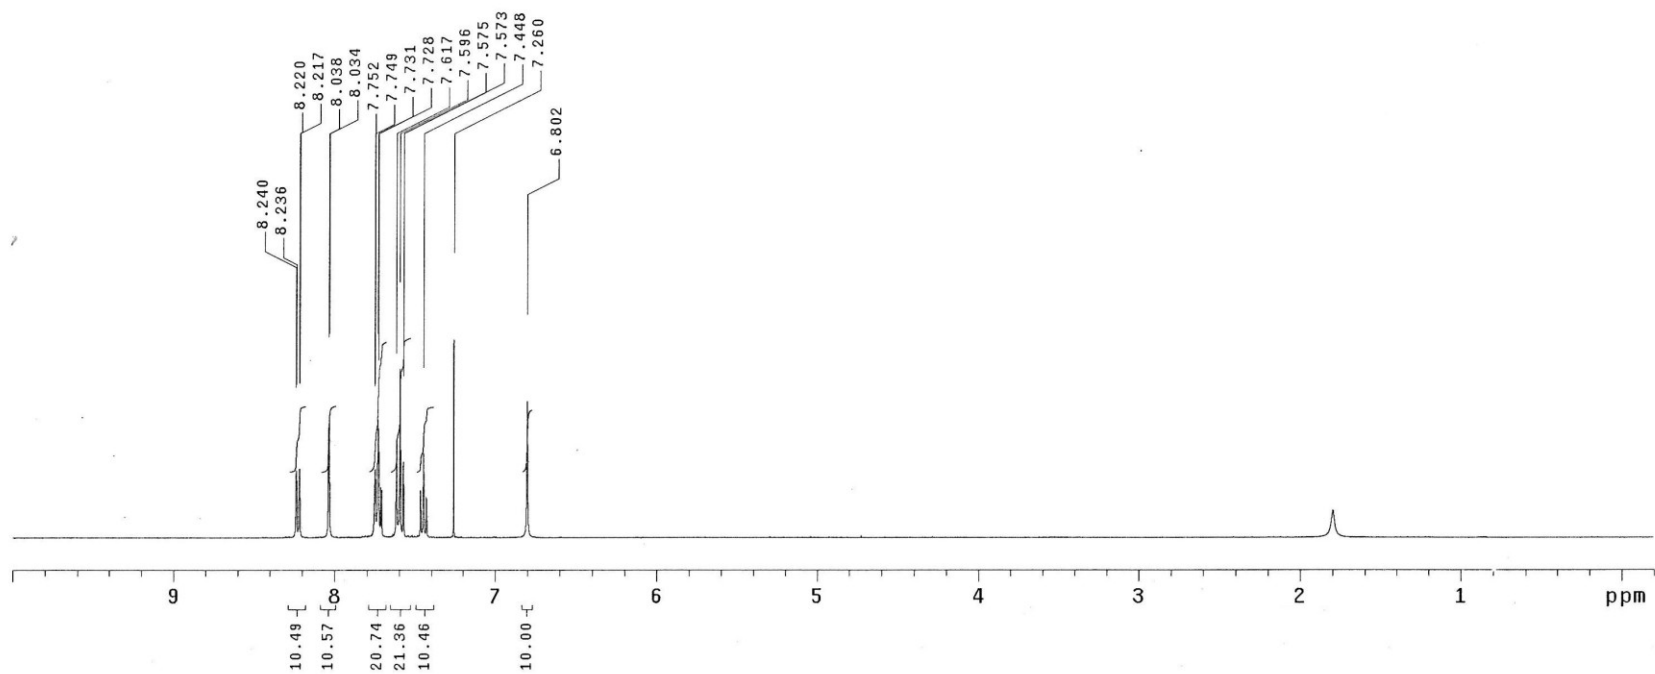

# Compound 4i (<sup>13</sup>C-NMR spectral data)

MC0801

Pulse Sequence: s2pu1  
UNITYplus-400 "unity400"  
Date: Aug 5 2019  
Solvent: CDCl<sub>3</sub>  
Ambient temperature  
Total 6576 repetitions

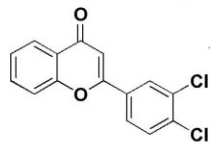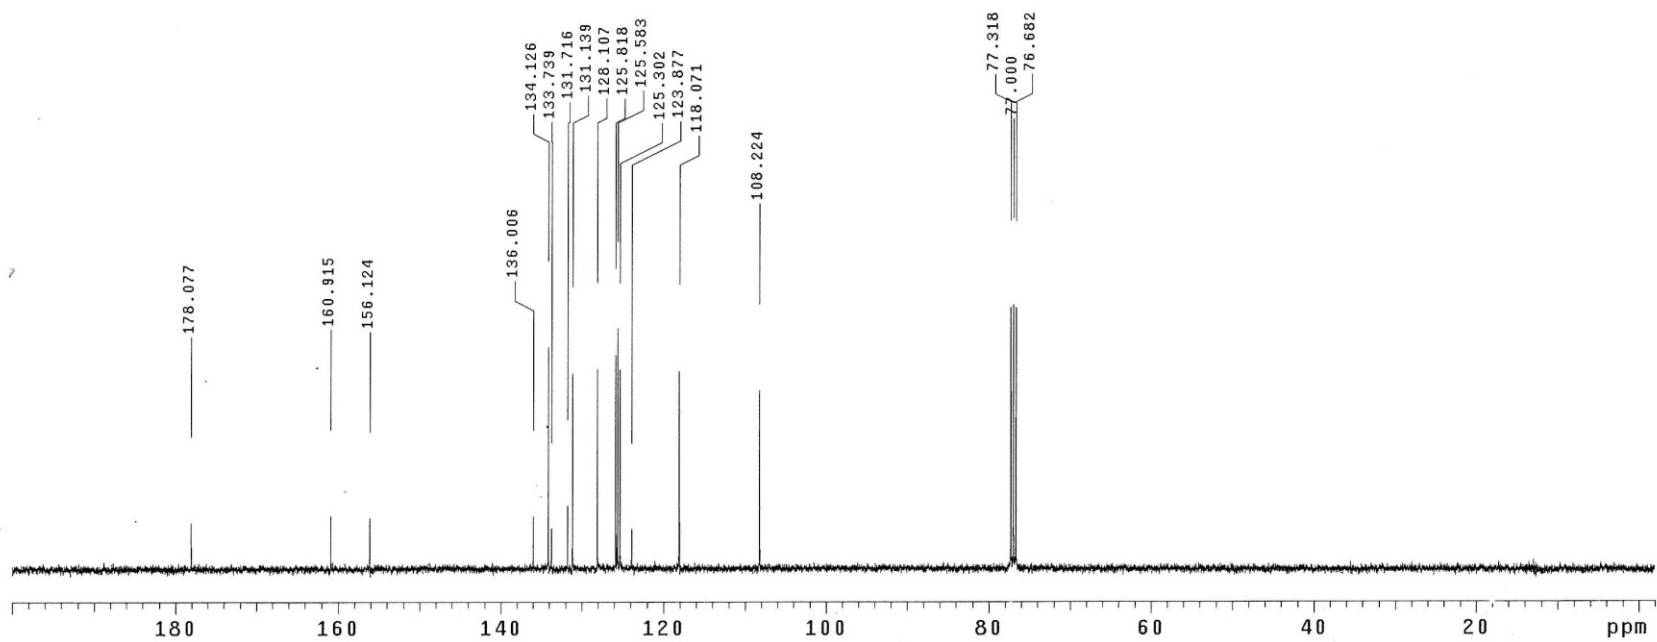

# Compound 4j (<sup>1</sup>H-NMR spectral data)

MC0716

Pulse Sequence: s2pu1  
UNITYplus-400 "unity400"  
Date: Aug 21 2019  
Solvent: CDC13  
Ambient temperature  
Total 32 repetitions

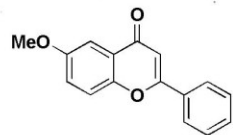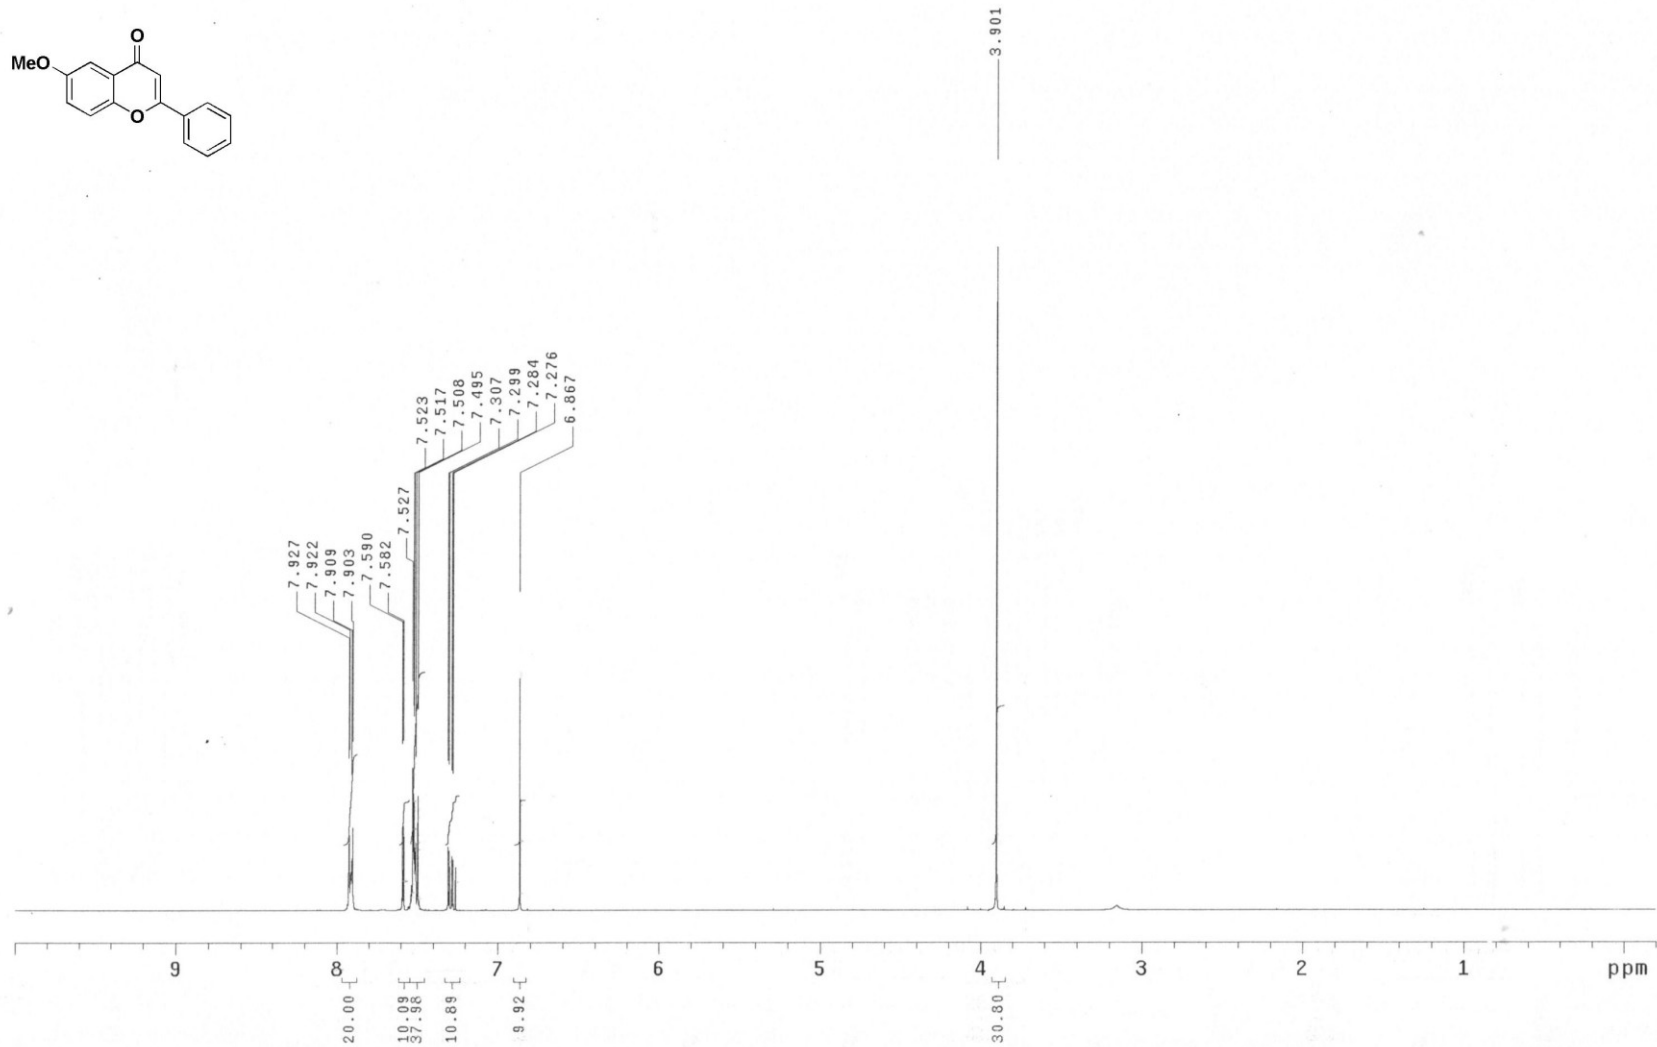

# Compound 4j (<sup>13</sup>C-NMR spectral data)

MC0716

Pulse Sequence: s2pu1

UNITYplus-400 "unity400"

Date: Aug 21 2019

Solvent: CDCl<sub>3</sub>

Ambient temperature

Total 656 repetitions

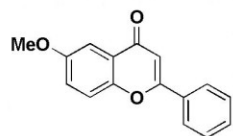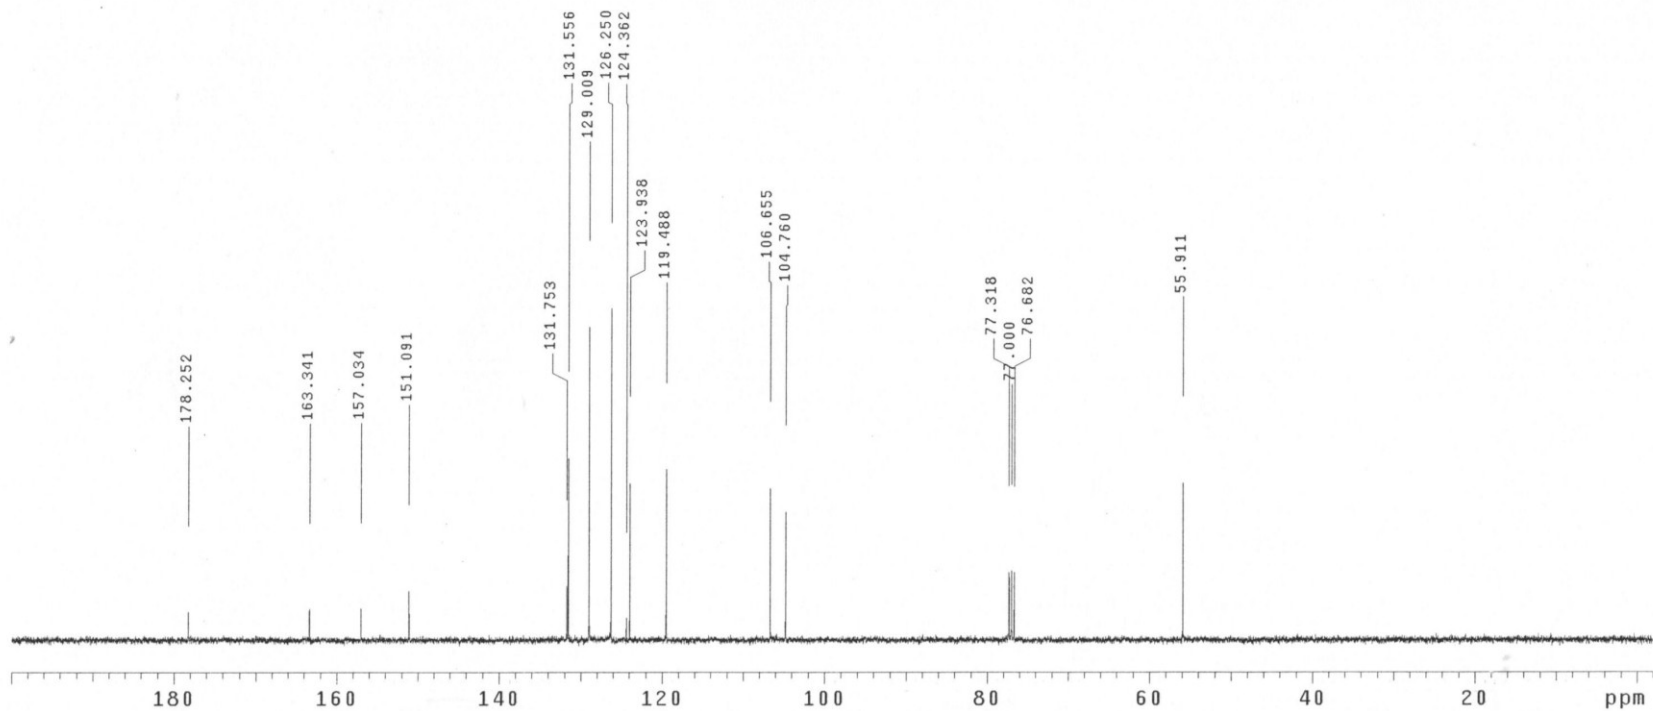

# Compound 4k (<sup>1</sup>H-NMR spectral data)

MC0717

Pulse Sequence: s2pu1  
UNITYplus-400 "unity400"  
Date: Aug 19 2019  
Solvent: CDCl<sub>3</sub>  
Ambient temperature  
Total 32 repetitions

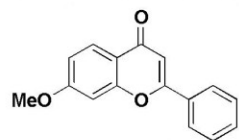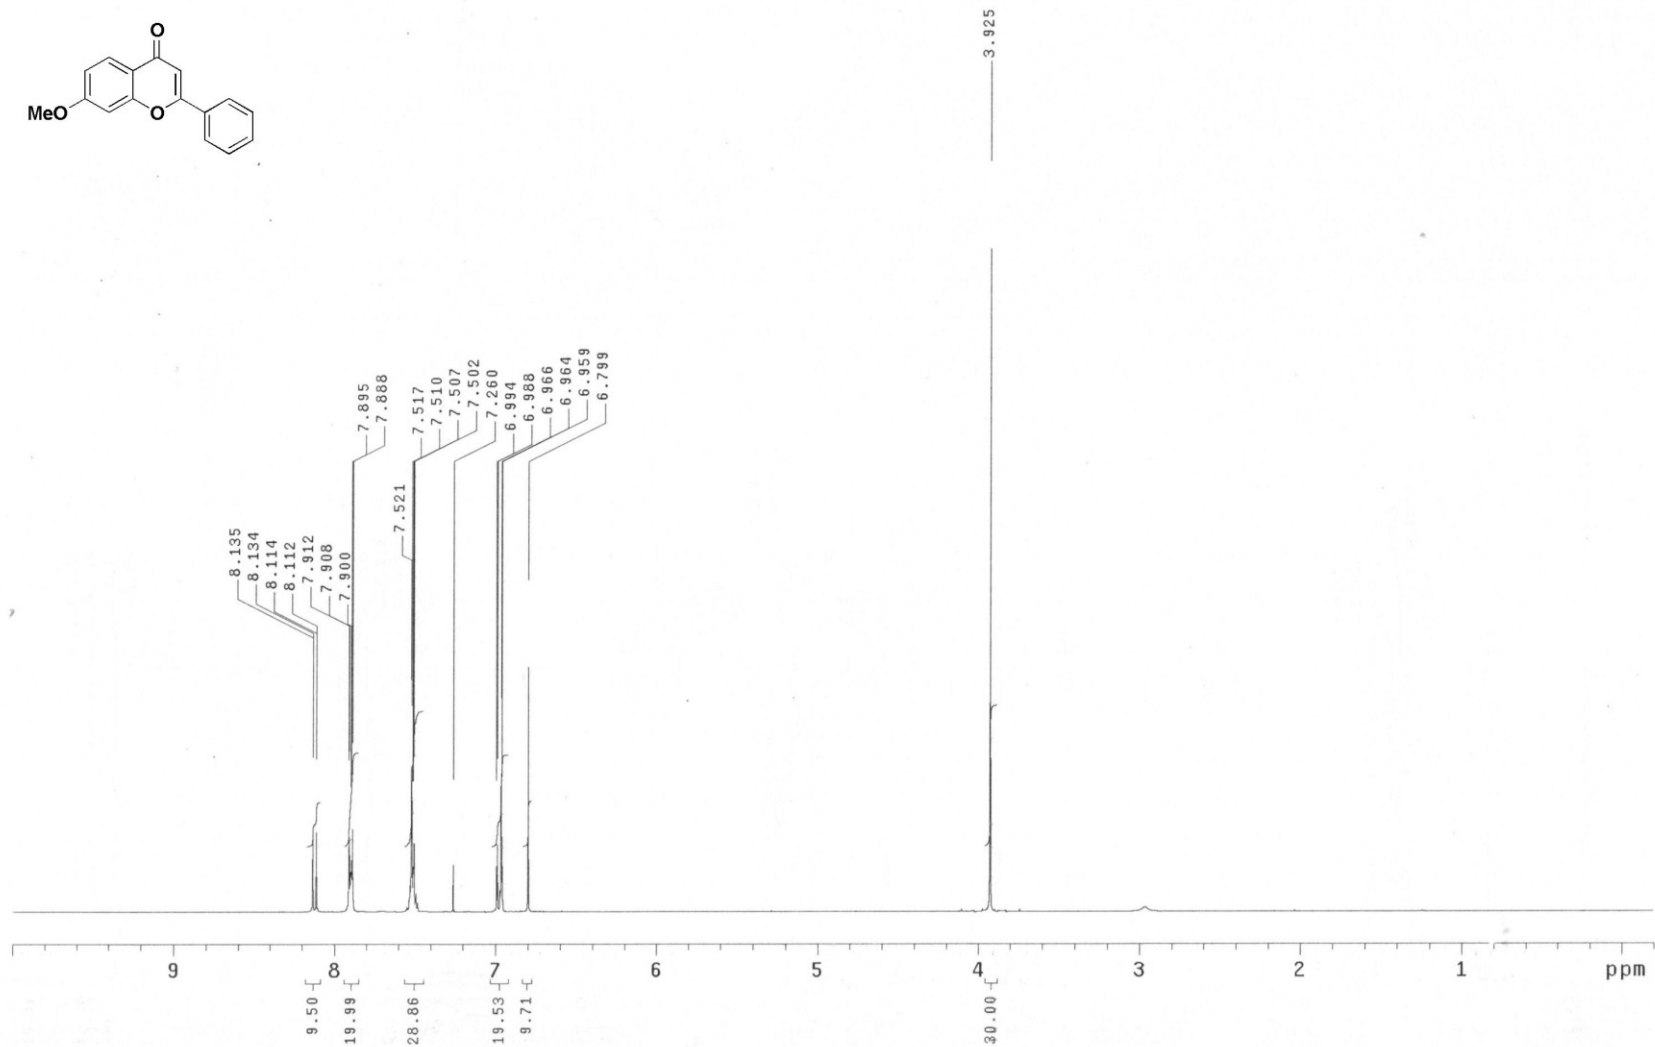

# Compound 4k (<sup>13</sup>C-NMR spectral data)

MC0717

Pulse Sequence: s2pu1

UNITYplus-400 "unity400"

Date: Aug 19 2019

Solvent: CDCl<sub>3</sub>

Ambient temperature

Total 656 repetitions

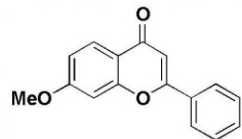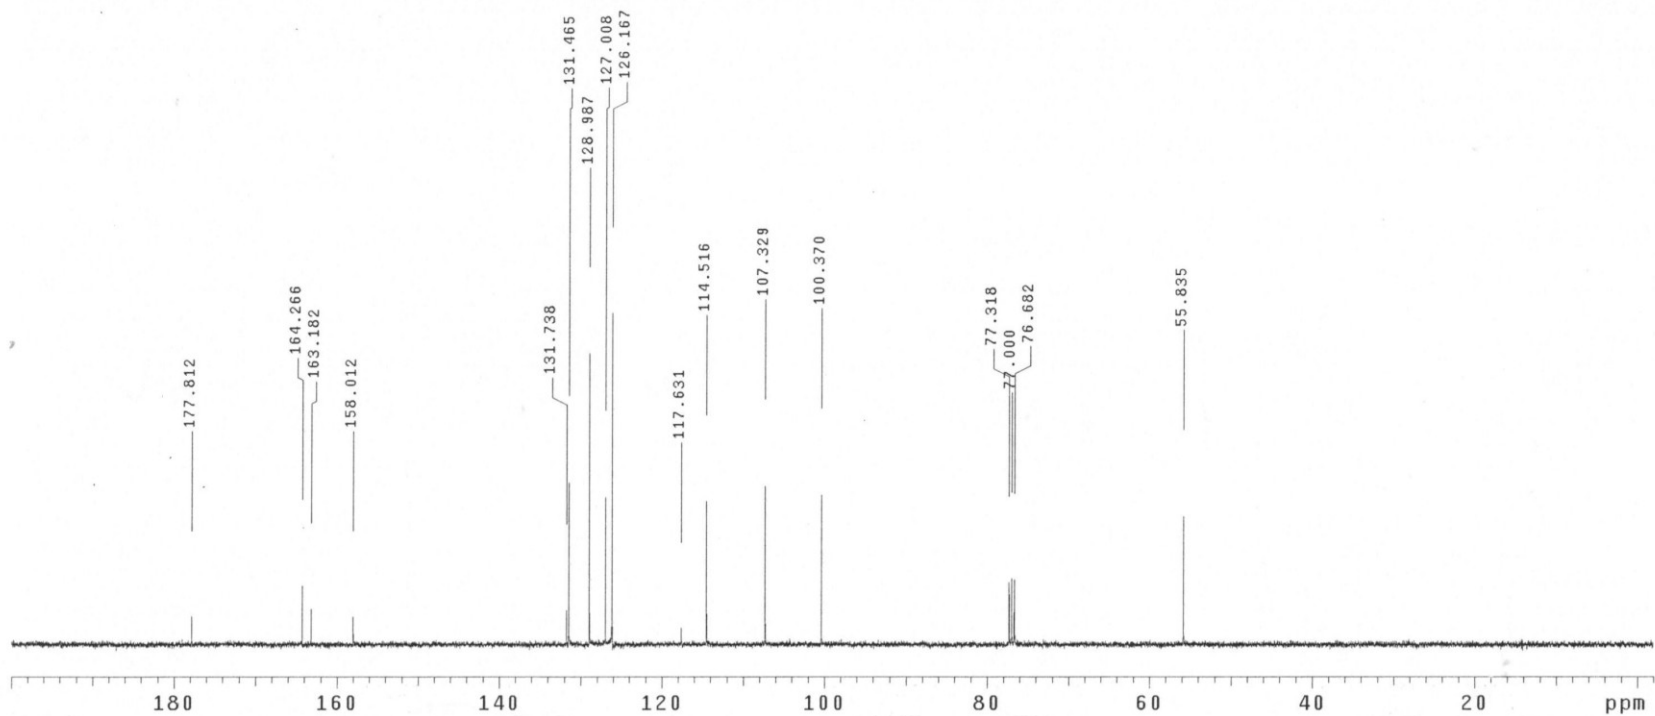

# Compound 4I (<sup>1</sup>H-NMR spectral data)

MC0720

Pulse Sequence: s2pu1  
UNITYplus-400 "unity400"  
Date: Aug 19 2019  
Solvent: CDCl<sub>3</sub>  
Ambient temperature  
Total 32 repetitions

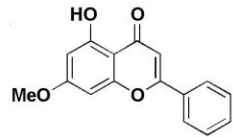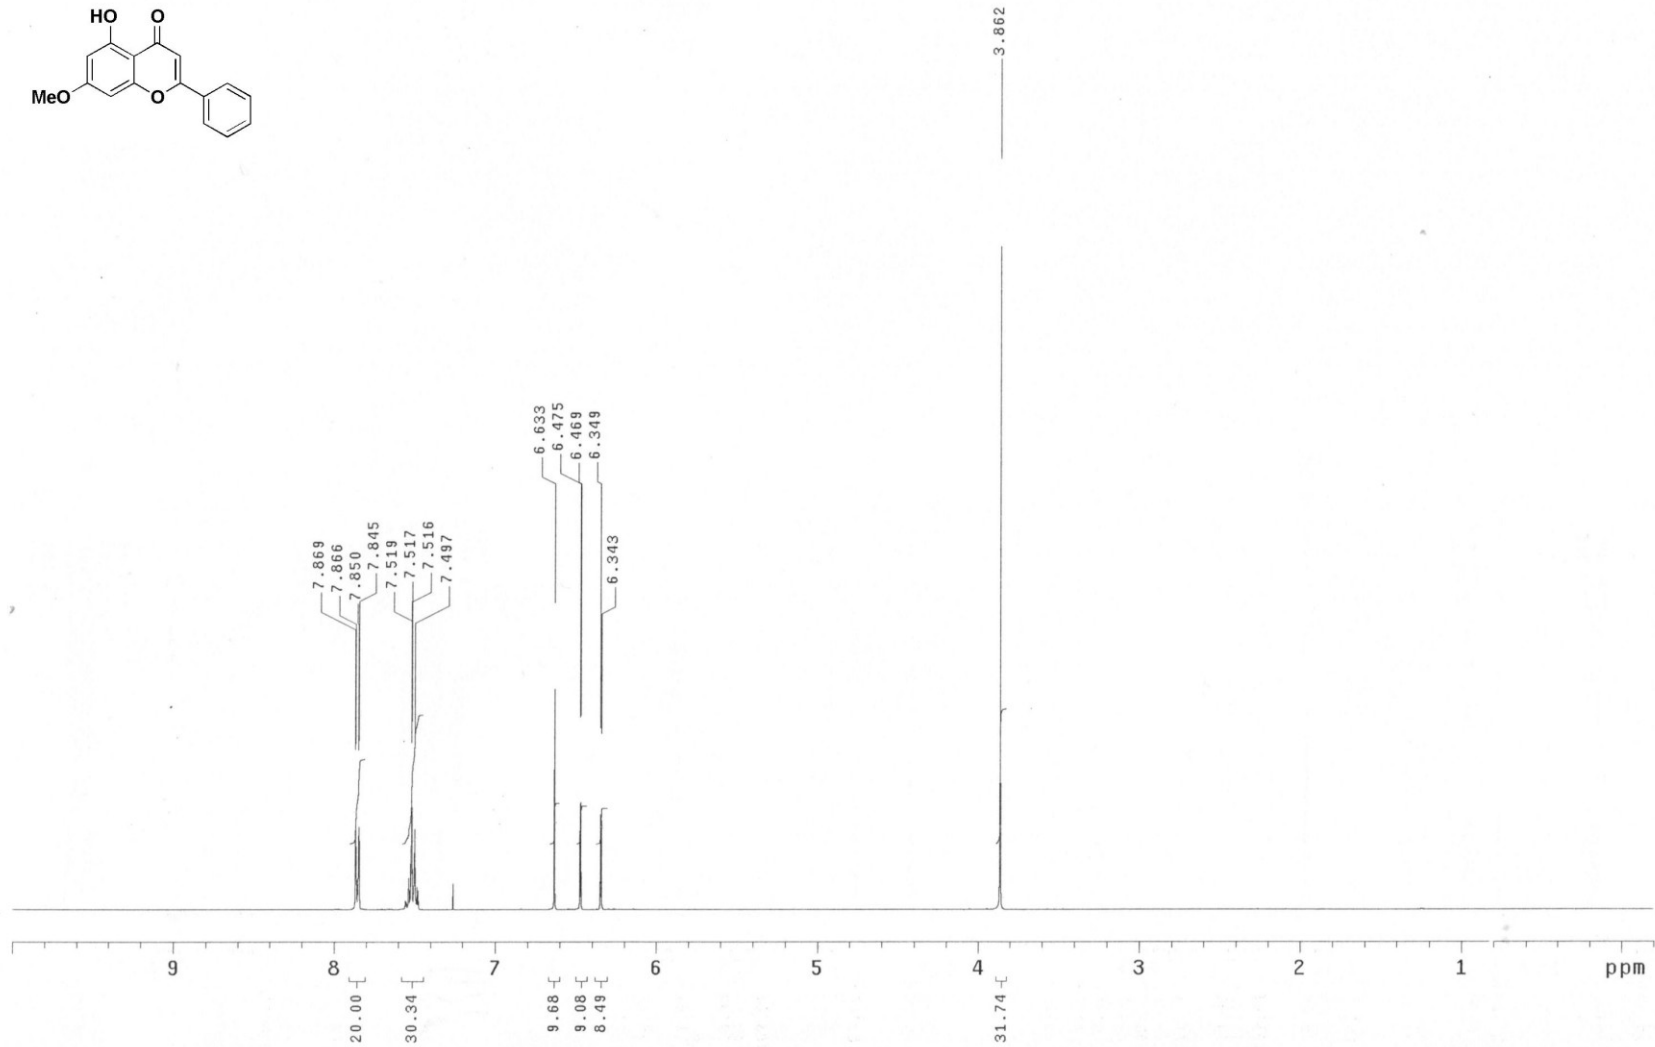



# Compound 4I (<sup>13</sup>C-NMR spectral data)

MC0720

Pulse Sequence: s2pu1  
UNITYplus-400 "unity400"  
Date: Aug 19 2019  
Solvent: CDC13  
Ambient temperature  
Total 1248 repetitions

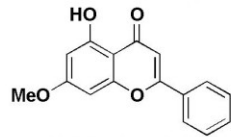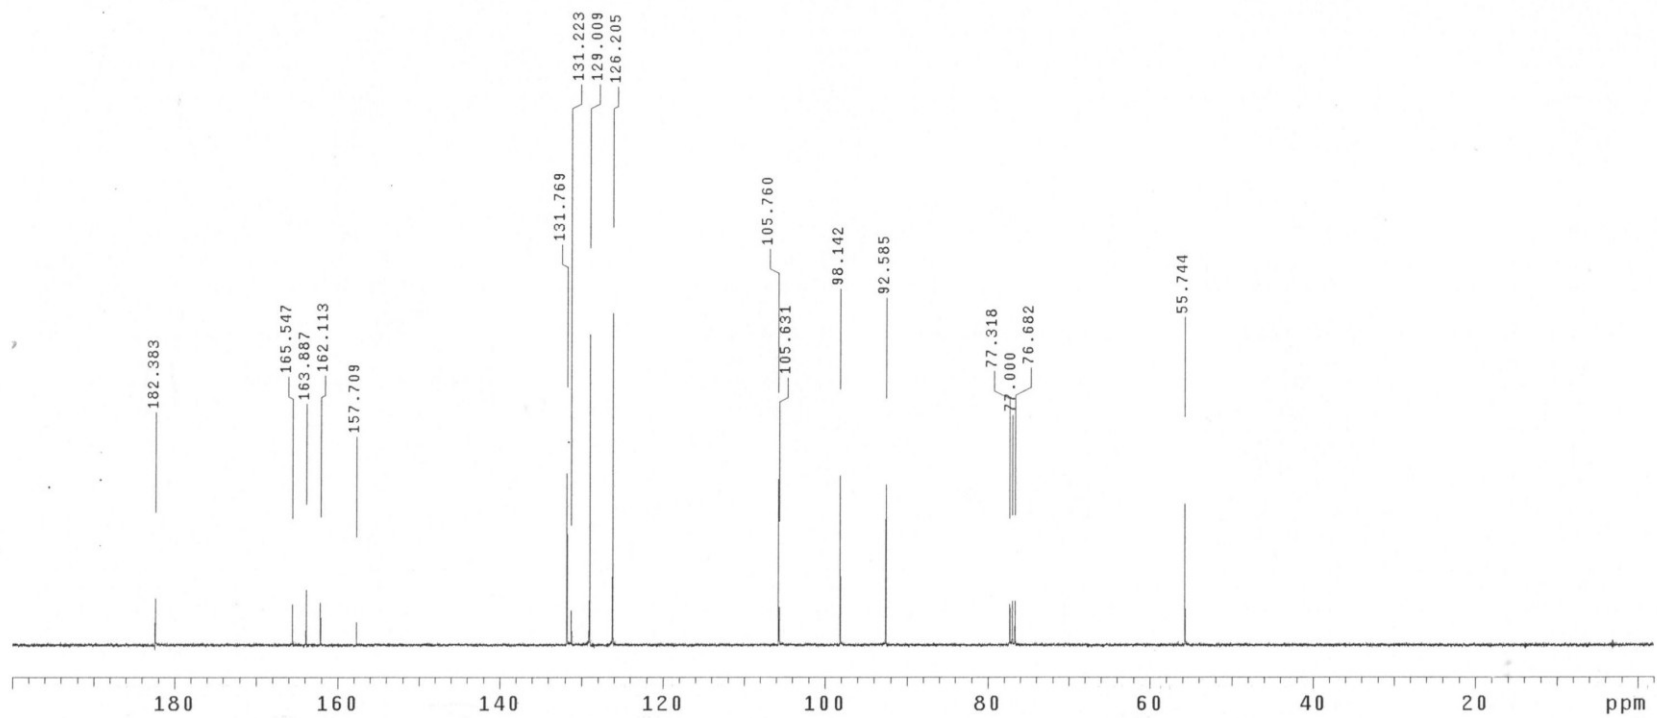

# Compound 4m (<sup>1</sup>H-NMR spectral data)

MC0722

Pulse Sequence: s2pu1

UNITYplus-400 "unity400"

Date: Aug 21 2019

Solvent: CDCl<sub>3</sub>

Ambient temperature

Total 32 repetitions

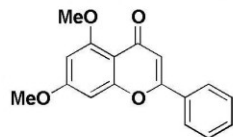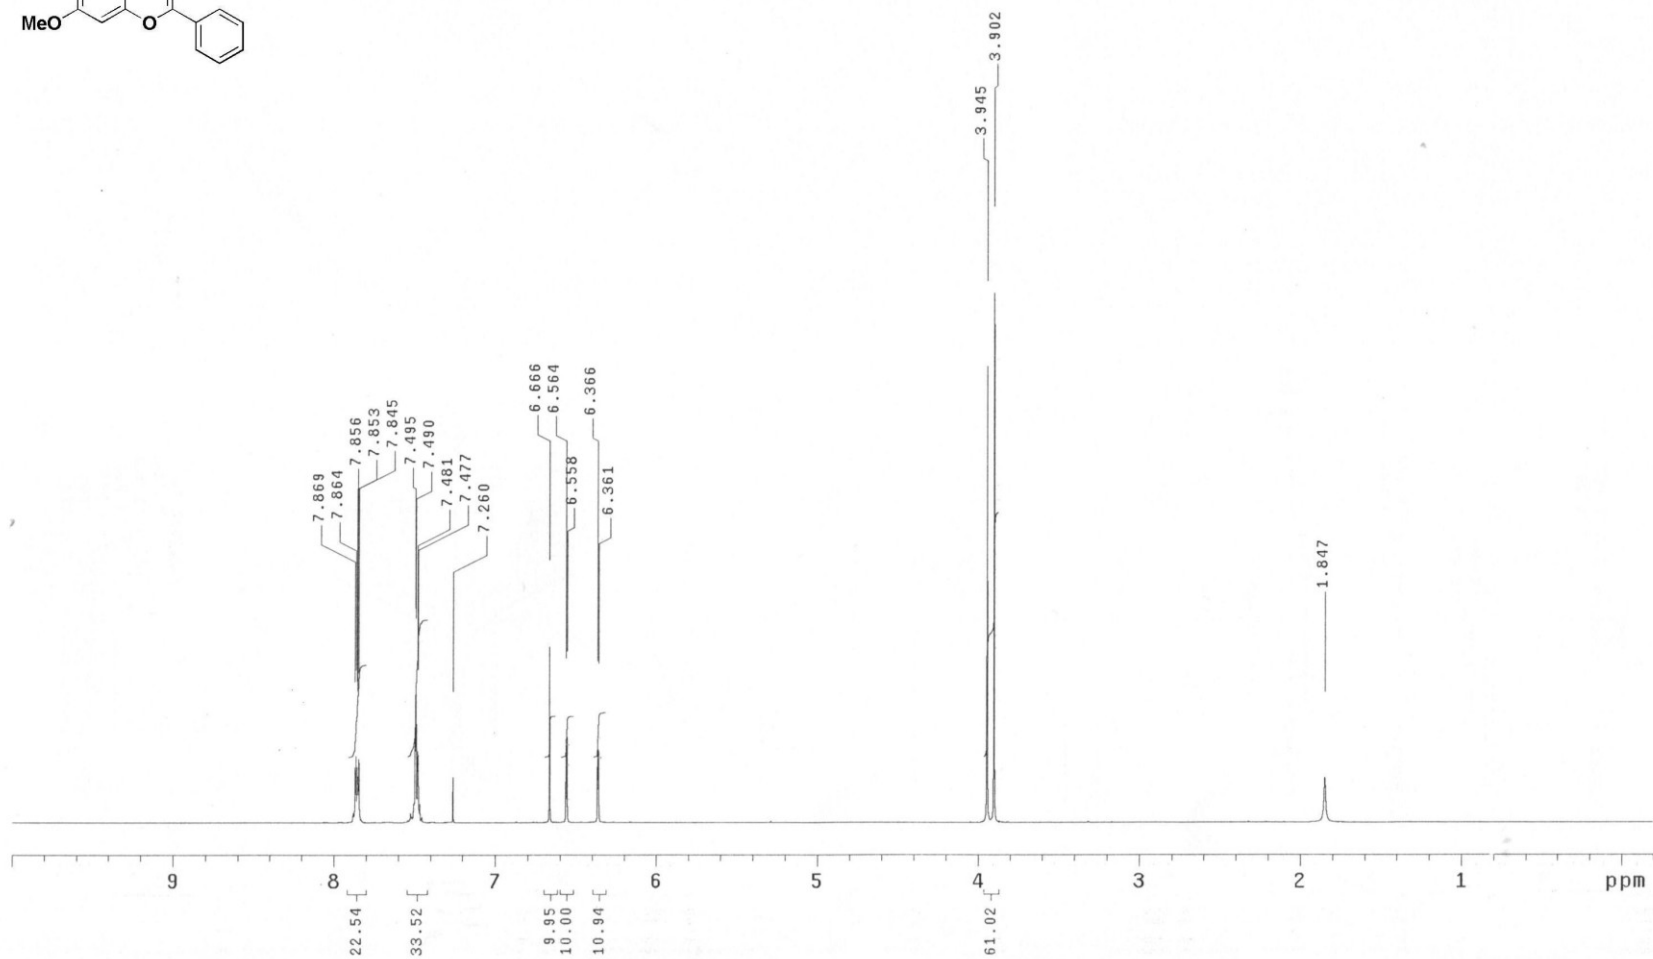

# Compound 4m (<sup>13</sup>C-NMR spectral data)

MC0722

Pulse Sequence: s2pu1  
UNITYplus-400 "unity400"  
Date: Aug 21 2019  
Solvent: CDCl<sub>3</sub>  
Ambient temperature  
Total 1600 repetitions

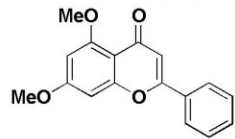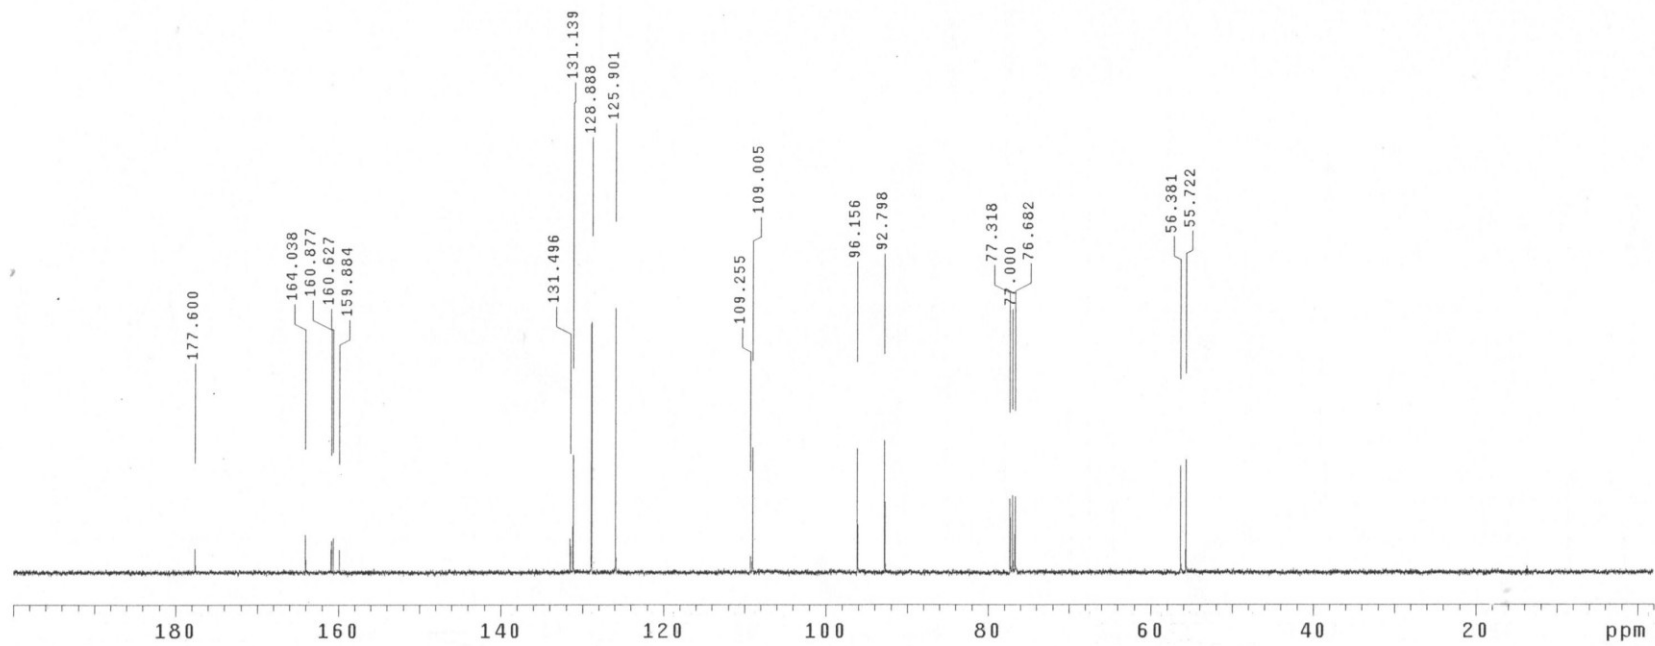

# Compound 4n (<sup>1</sup>H-NMR spectral data)

MC0806

Pulse Sequence: s2pu1

UNITYplus-400 "unity400"

Date: Aug 12 2019

Solvent: CDC13

Ambient temperature

Total 32 repetitions

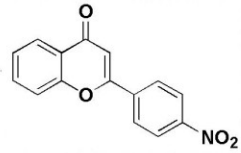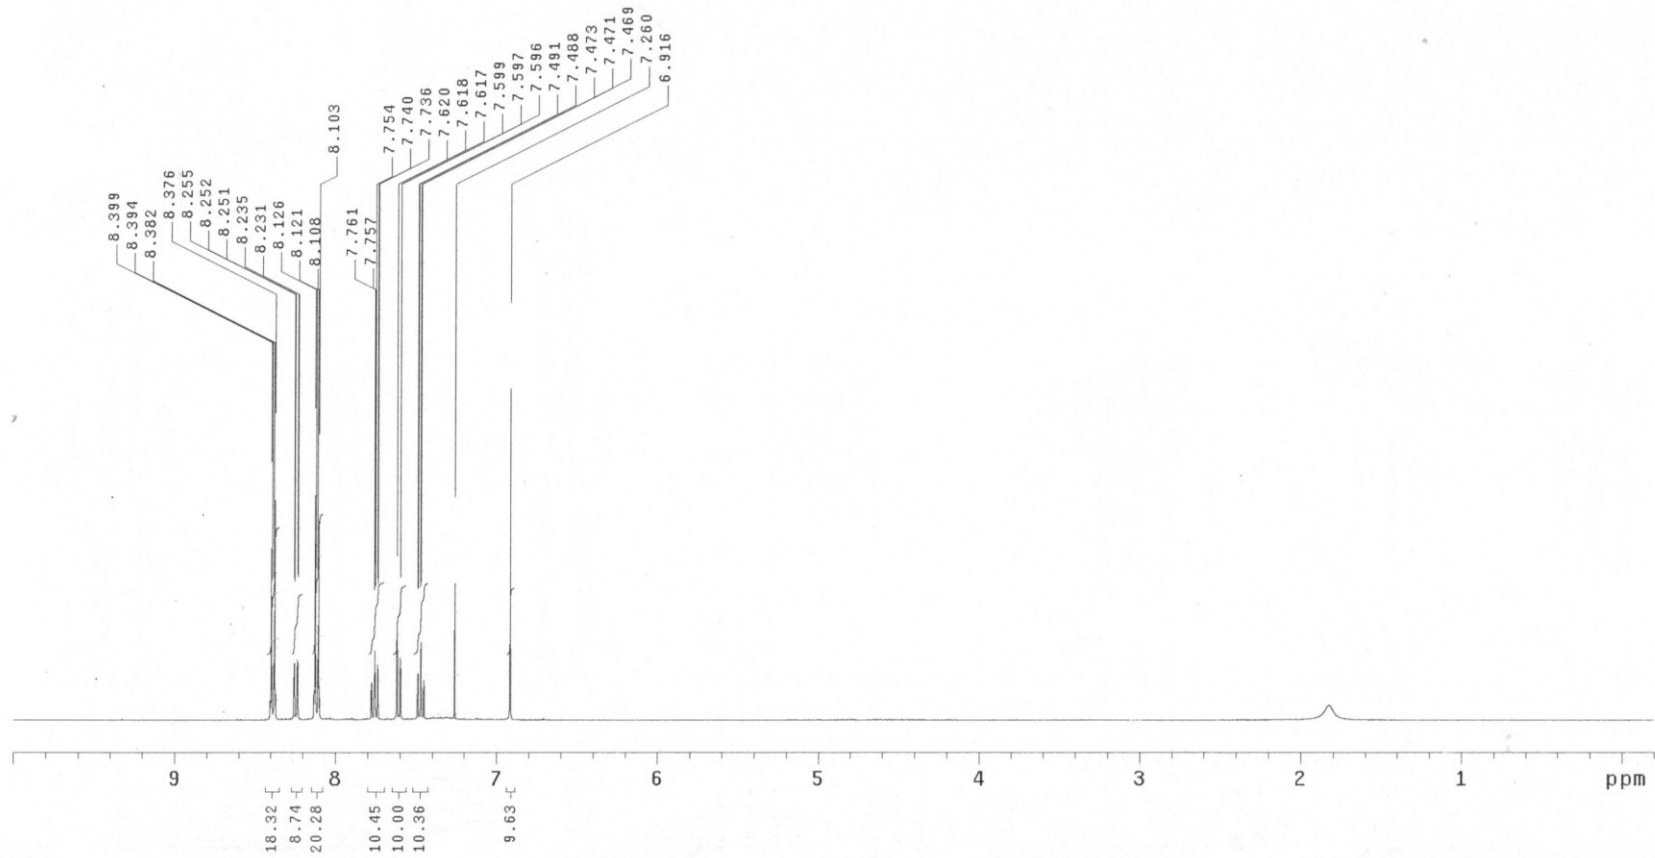

# Compound 4n (<sup>13</sup>C-NMR spectral data)

MC0806

Pulse Sequence: s2pu1  
UNITYplus-400 "unity400"  
Date: Aug 12 2019  
Solvent: CDC13  
Ambient temperature  
Total 2384 repetitions

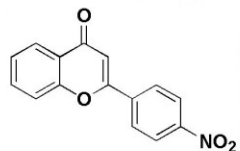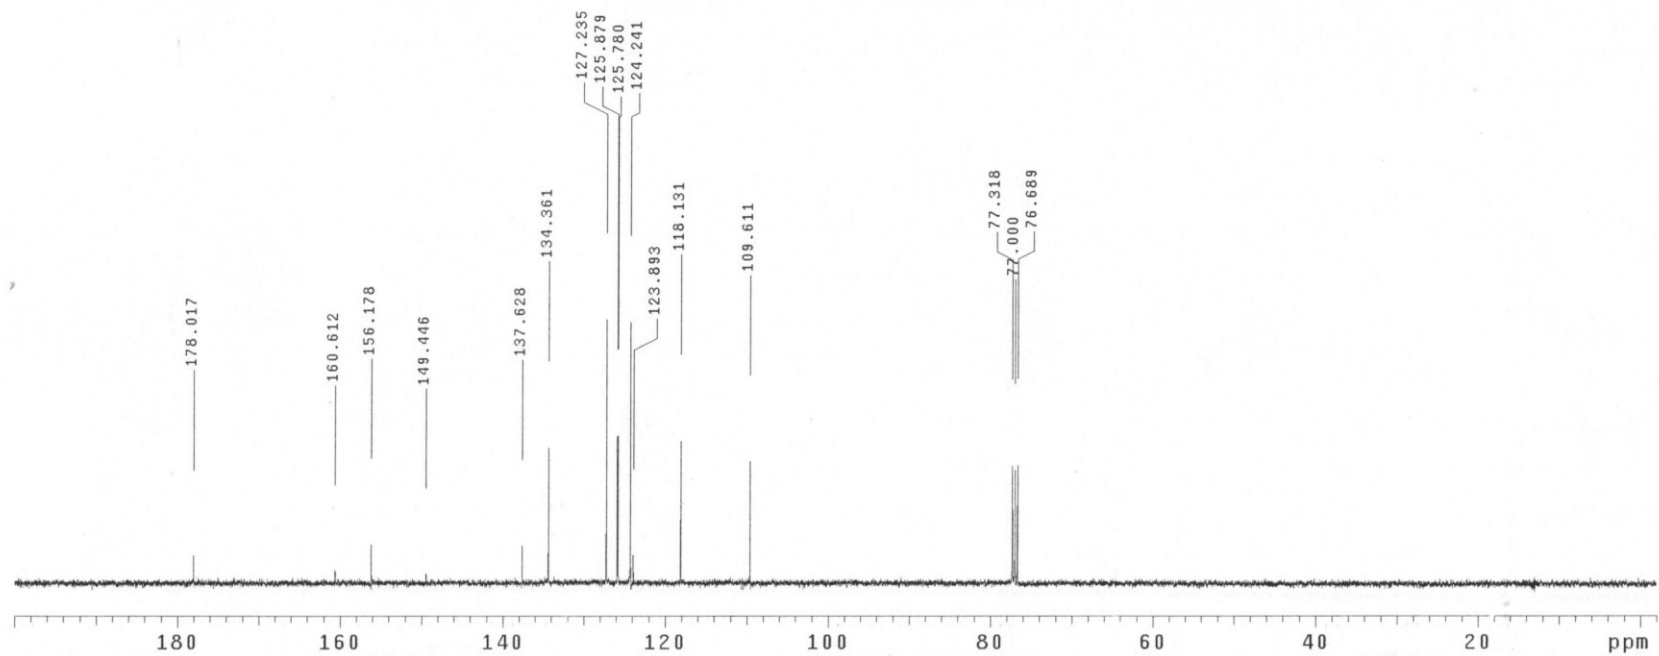

# Compound 4o (<sup>1</sup>H-NMR spectral data)

MC0811

Pulse Sequence: s2pu1

UNITYplus-400 "unity400"

Date: Aug 21 2019

Solvent: CDCl<sub>3</sub>

Ambient temperature

Total 64 repetitions

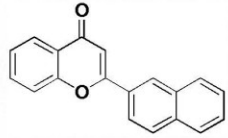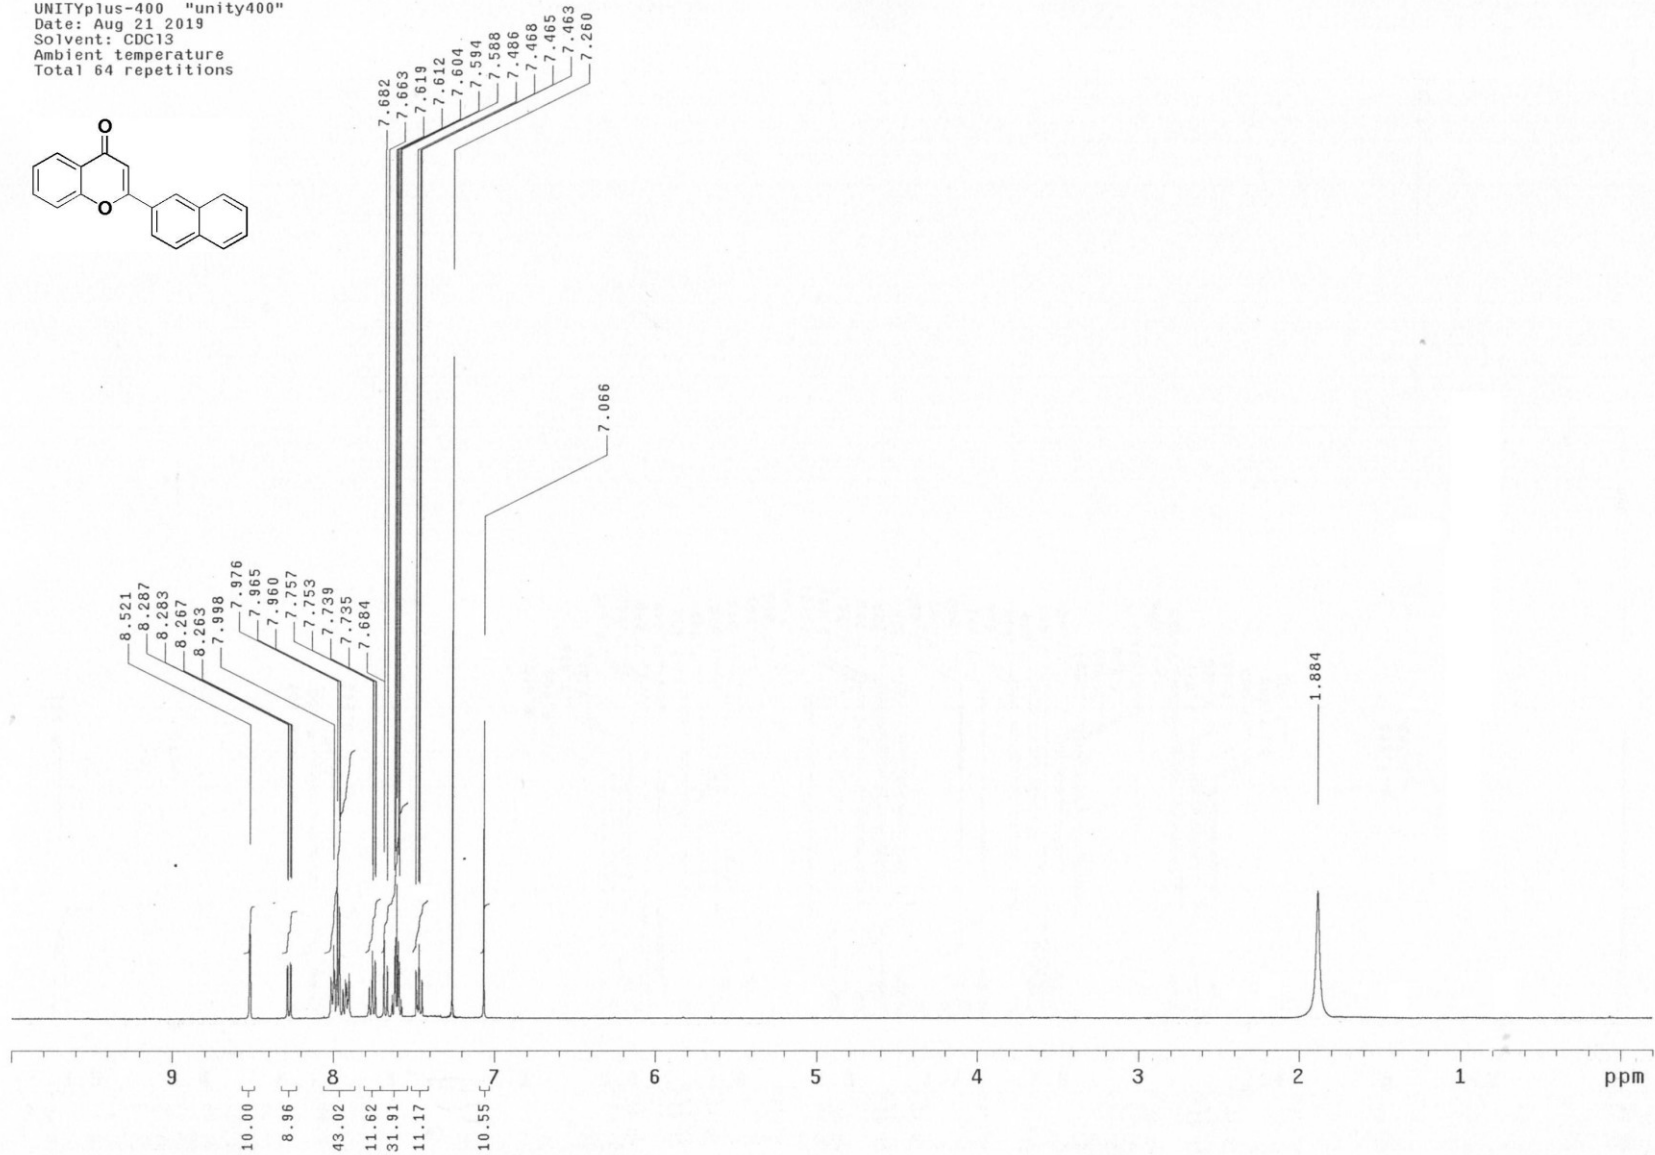

# Compound 4o (<sup>13</sup>C-NMR spectral data)

MC0811

Pulse Sequence: s2pu1  
UNITYplus-400 "unity400"  
Date: Aug 21 2019  
Solvent: CDC13  
Ambient temperature  
Total 31488 repetitions

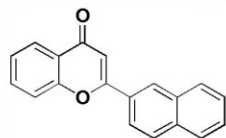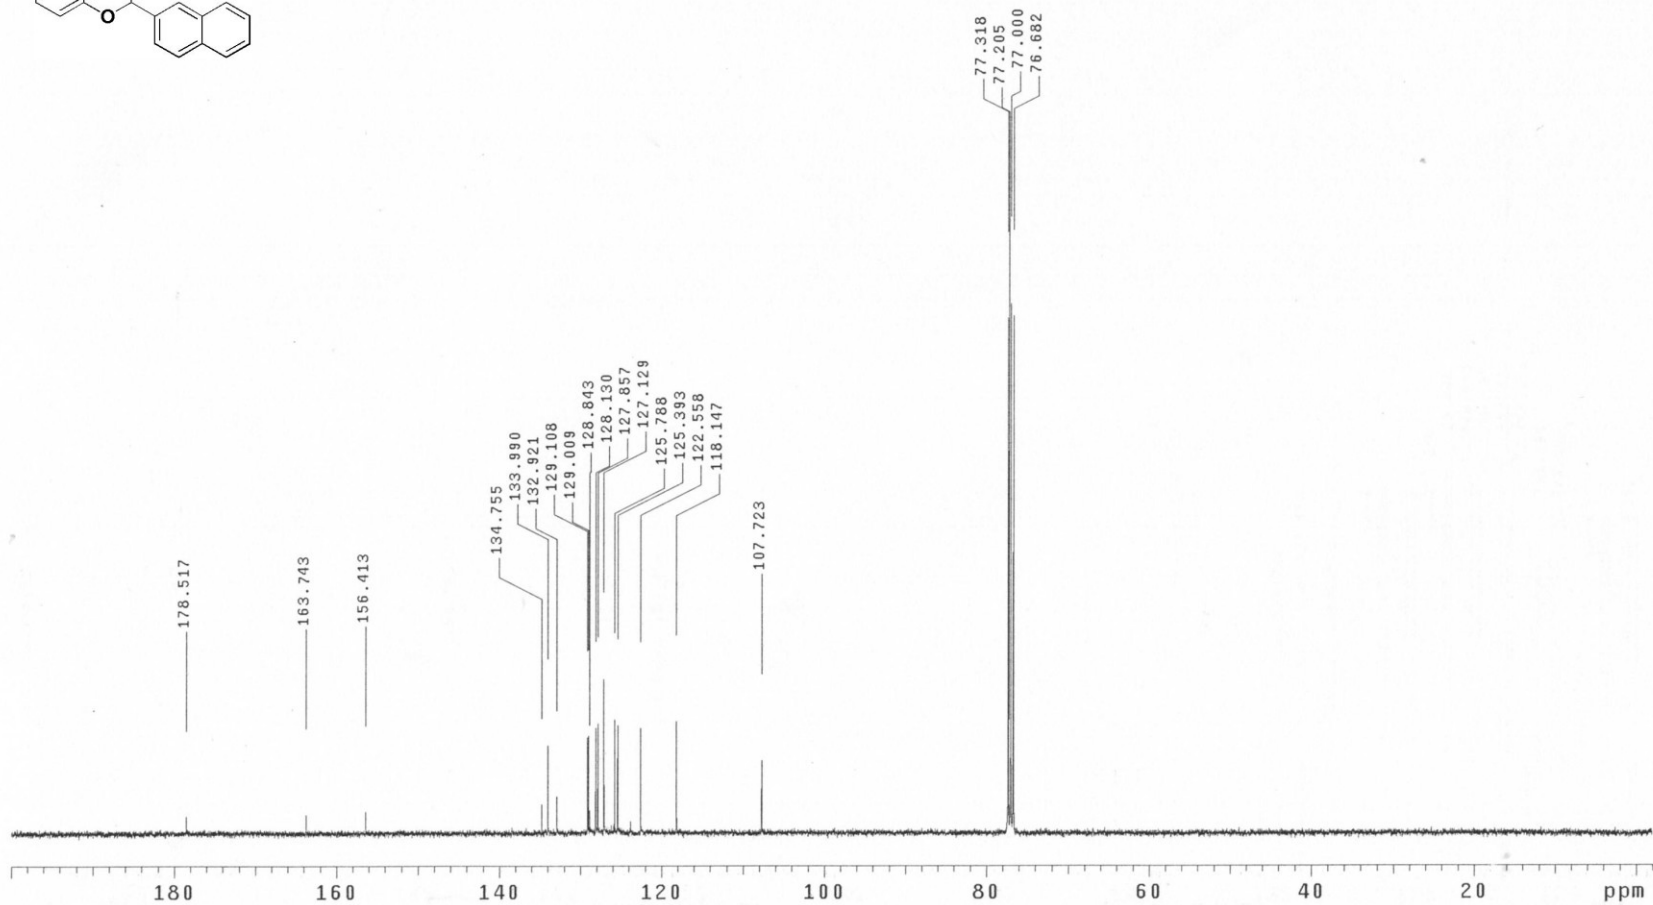

# Compound 4p (<sup>1</sup>H-NMR spectral data)

MC0820F

Pulse Sequence: s2pu1  
UNITYplus-400 "unity400"  
Date: Aug 22 2019  
Solvent: CDCl<sub>3</sub>  
Ambient temperature  
Total 160 repetitions

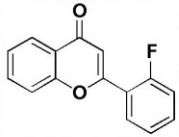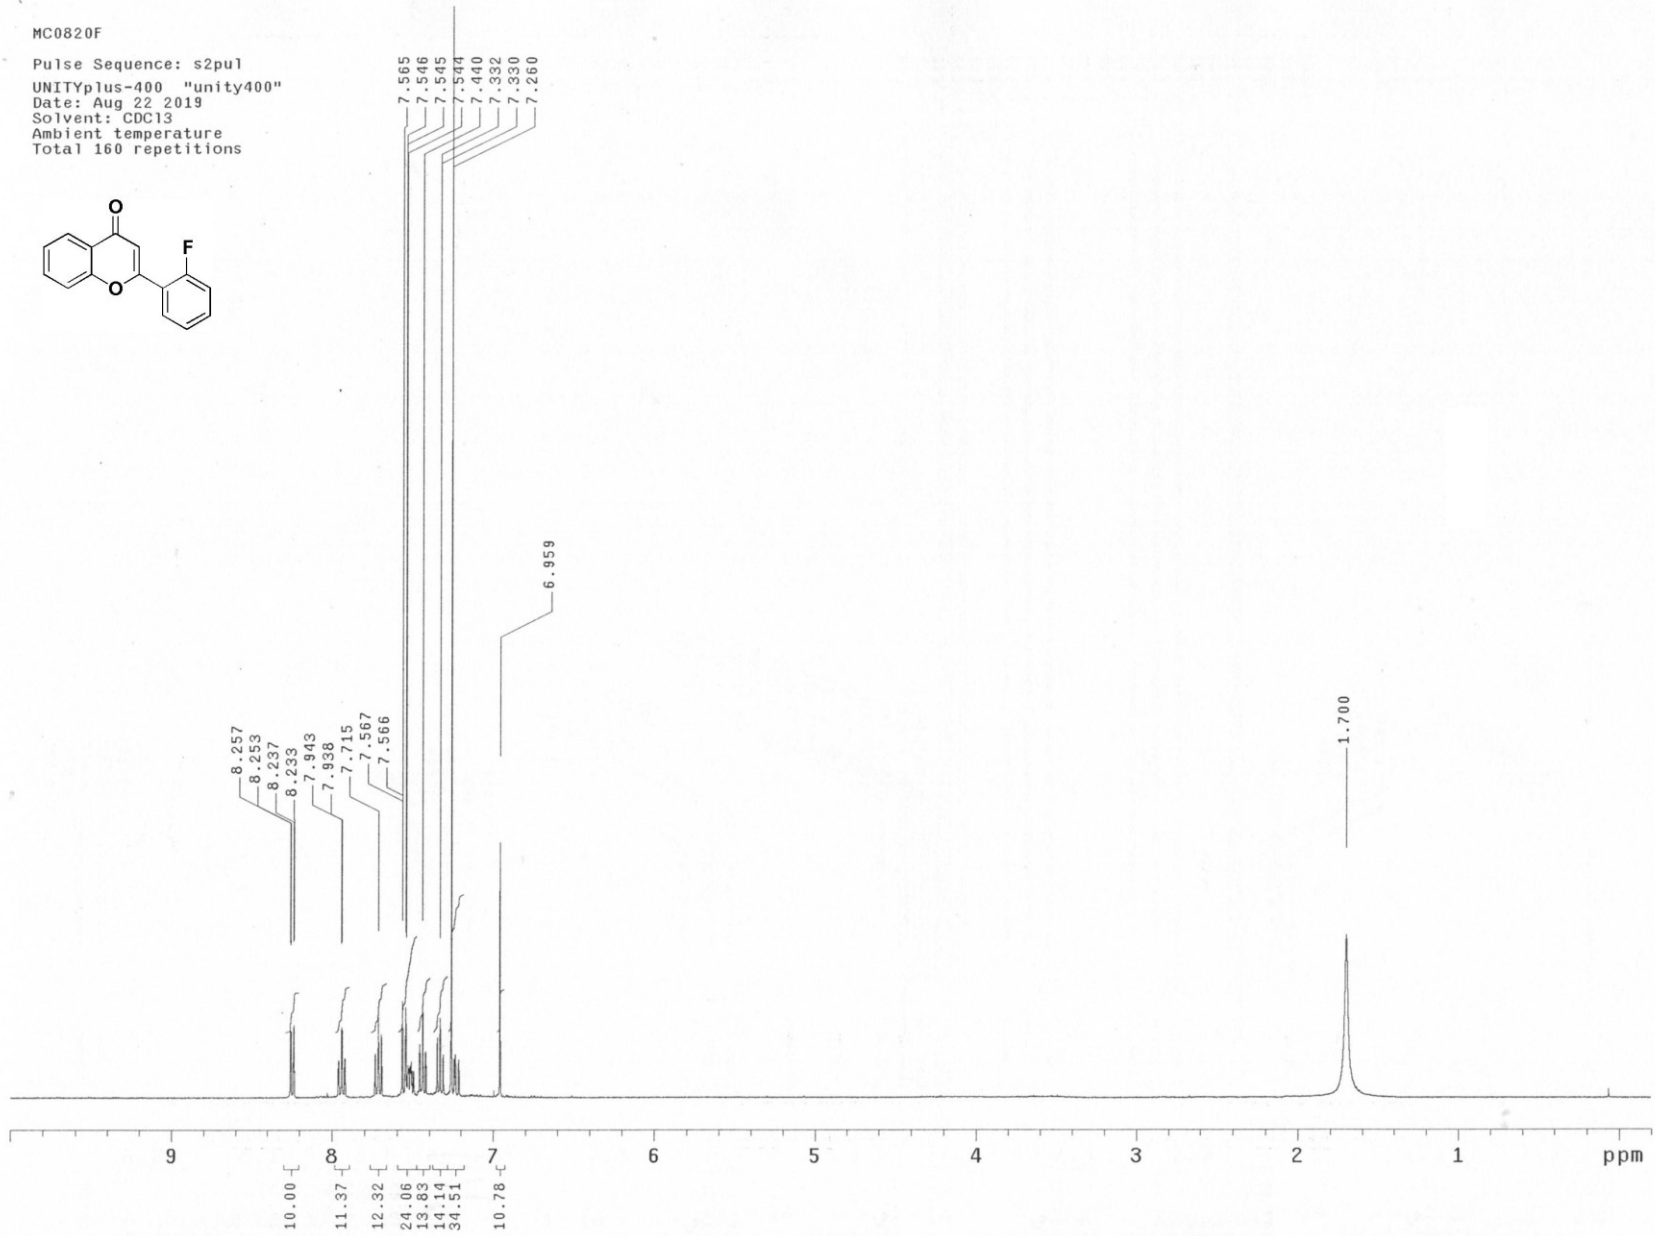



# Compound 4p (<sup>13</sup>C-NMR spectral data)

MC0820F

Pulse Sequence: s2pu1  
UNITYplus-400 "unity400"  
Date: Aug 22 2019  
Solvent: CDCl<sub>3</sub>  
Ambient temperature  
File: U0223-10  
Total 32000 repetitions

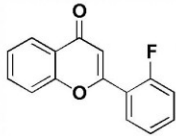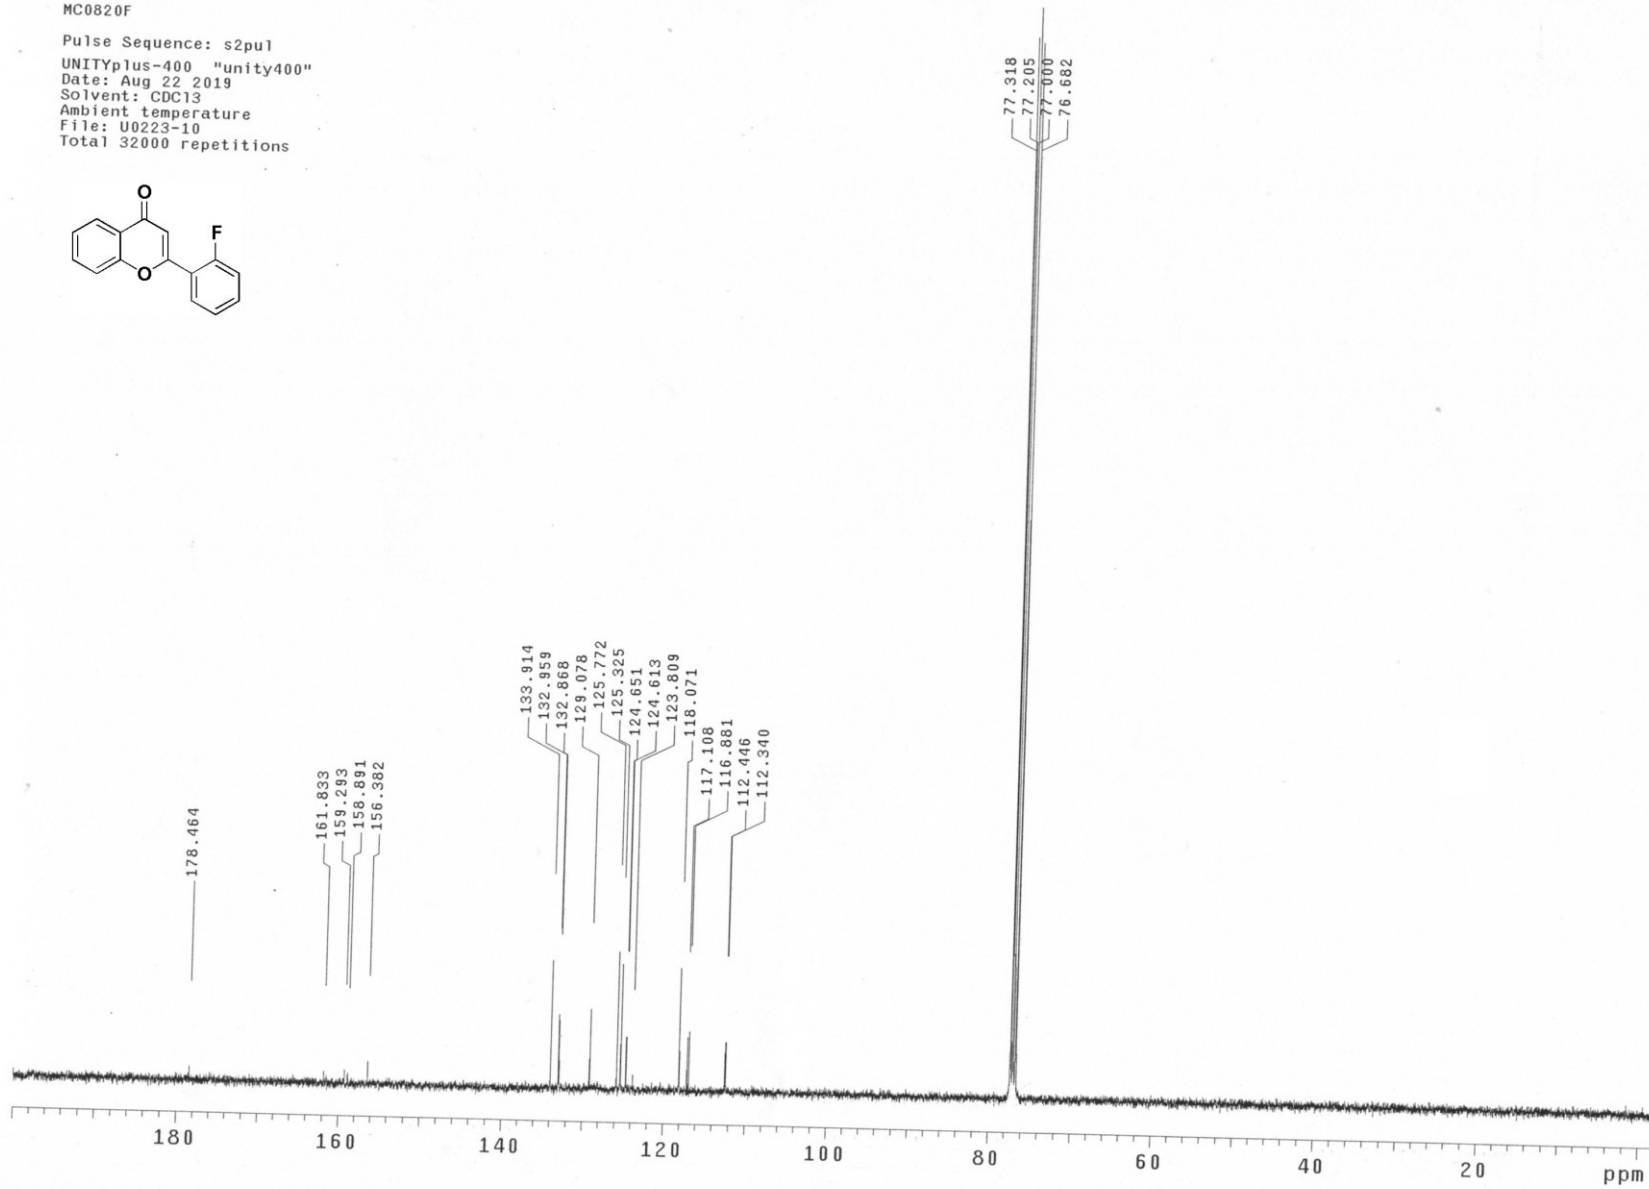

# Compound 4q (<sup>1</sup>H-NMR spectral data)

MC0828

Pulse Sequence: s2pu1

UNITYplus-400 "unity400"

Date: Aug 29 2019

Solvent: CDCl<sub>3</sub>

Ambient temperature

Total 64 repetitions

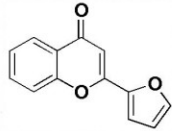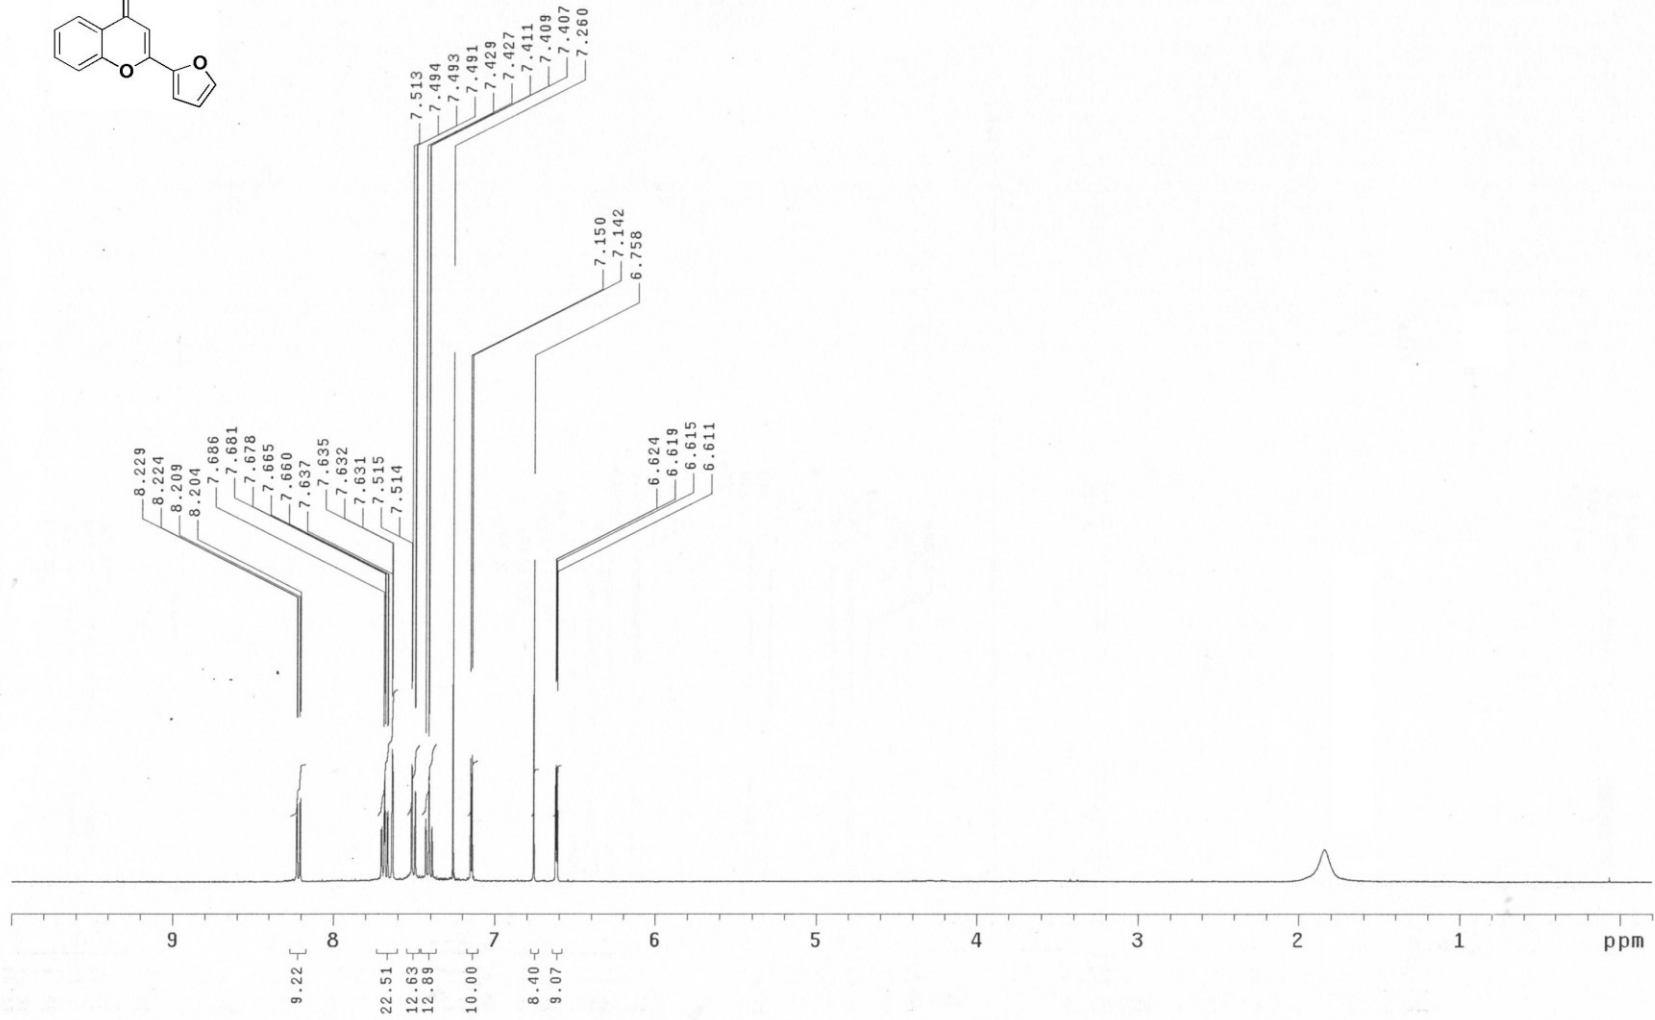

# Compound 4q (<sup>13</sup>C-NMR spectral data)

MC0828

Pulse Sequence: s2pu1

UNITYplus-400 "unity400"

Date: Aug 29 2019

Solvent: CDCl<sub>3</sub>

Ambient temperature

Total 30640 repetitions

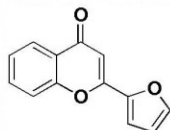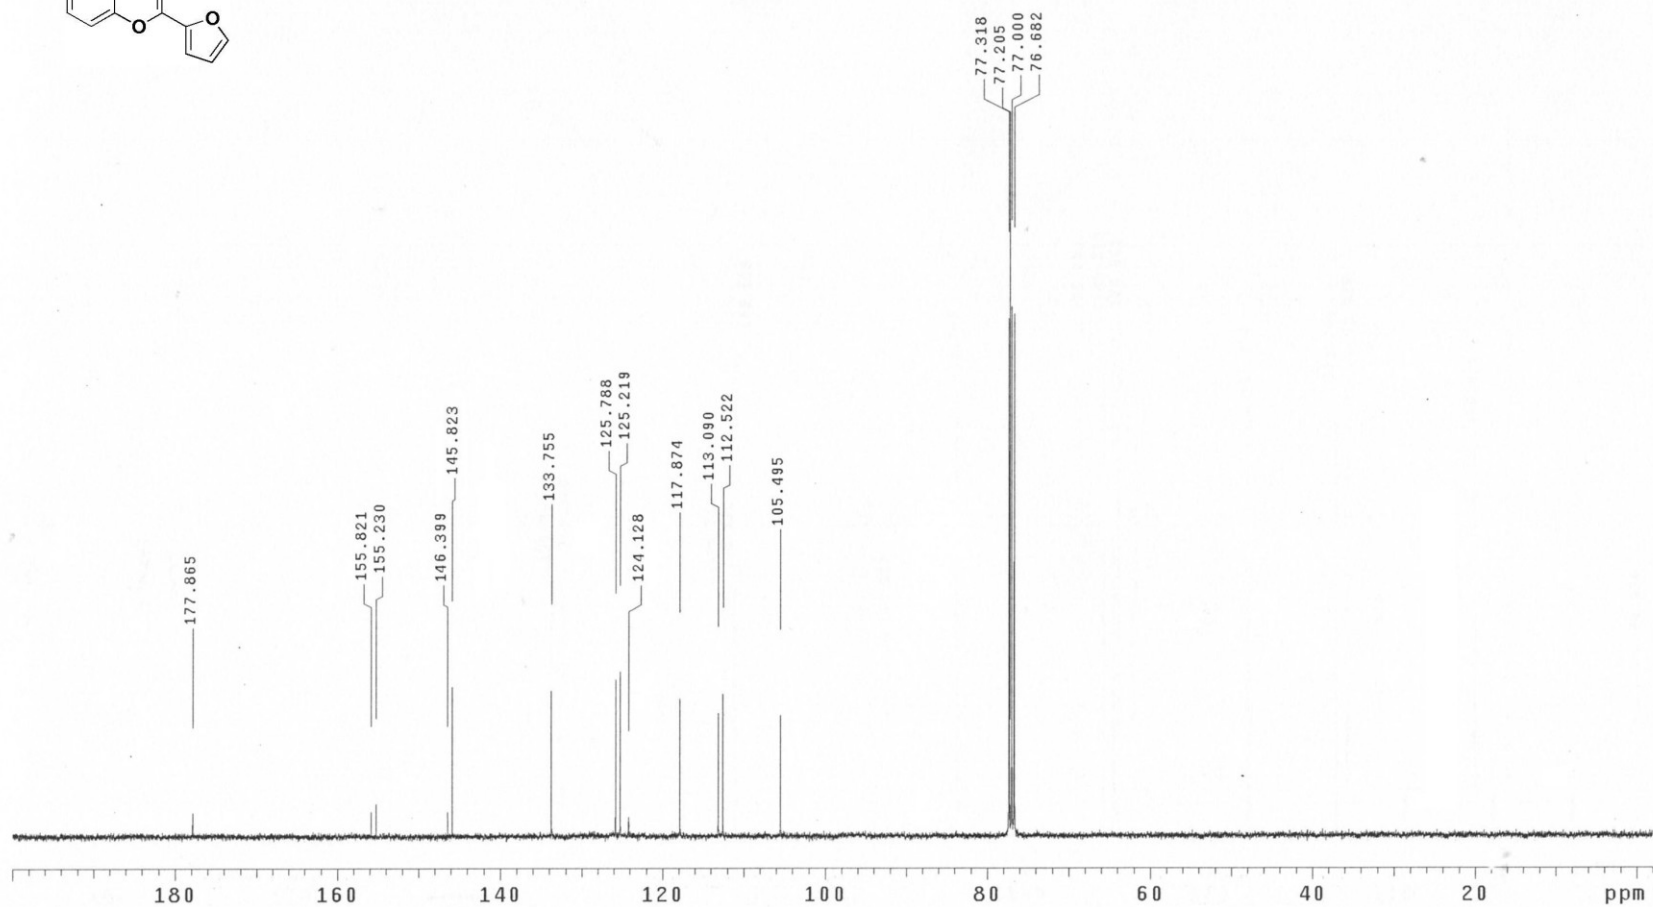

# Compound 4r (<sup>1</sup>H-NMR spectral data)

MC0812S

Pulse Sequence: s2pu1  
UNITYplus-400 "unity400"  
Date: Aug 19 2019  
Solvent: CDCl<sub>3</sub>  
Ambient temperature  
Total 80 repetitions

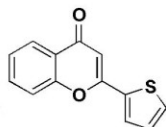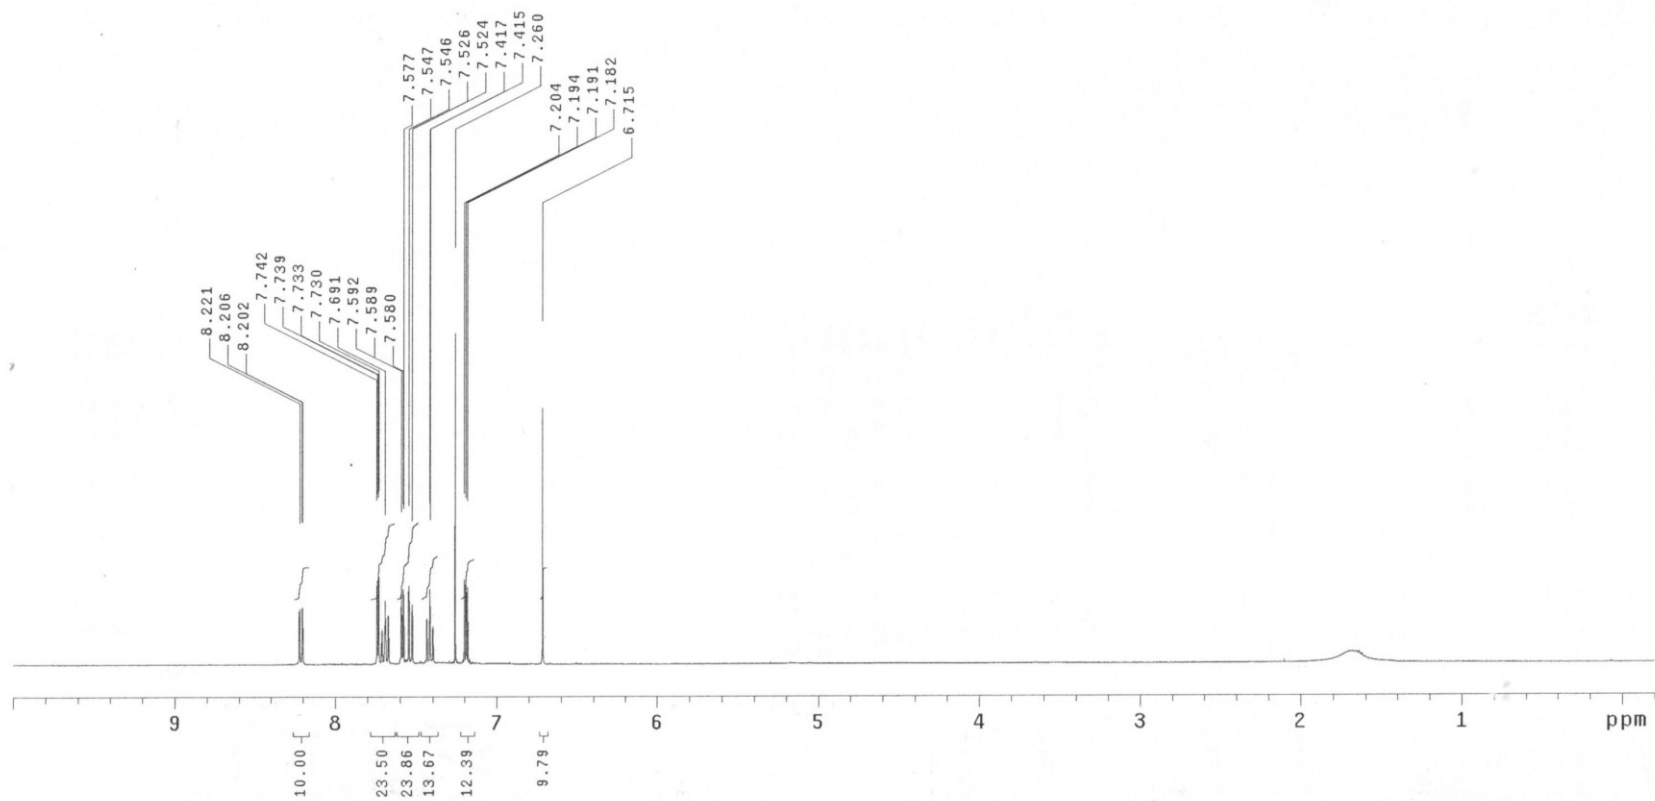

# Compound 4r (<sup>13</sup>C-NMR spectral data)

MC0812S

Pulse Sequence: s2pu1  
UNITYplus-400 "unity400"  
Date: Aug 19 2019  
Solvent: CDCl<sub>3</sub>  
Ambient temperature  
Total 32000 repetitions

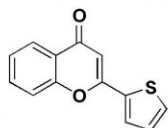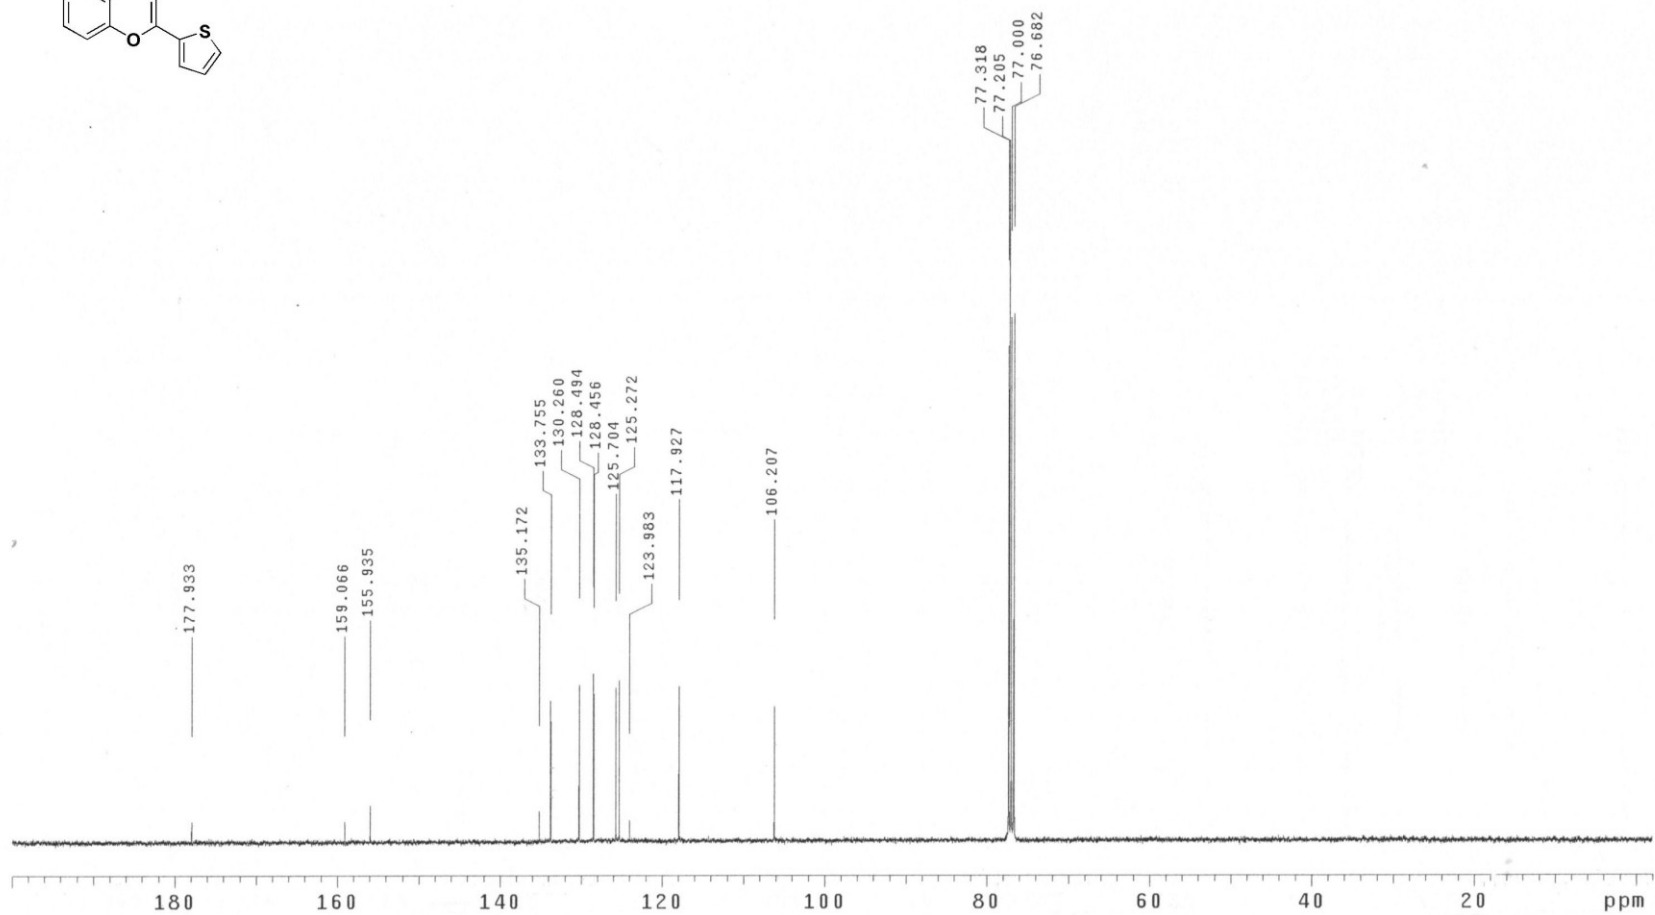

# Compound 4s (<sup>1</sup>H-NMR spectral data)

MC0827

Pulse Sequence: s2pu1

UNITYplus-400 "unity400"

Date: Aug 29 2019

Solvent: CDCl<sub>3</sub>

Ambient temperature

Total 32 repetitions

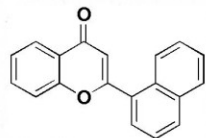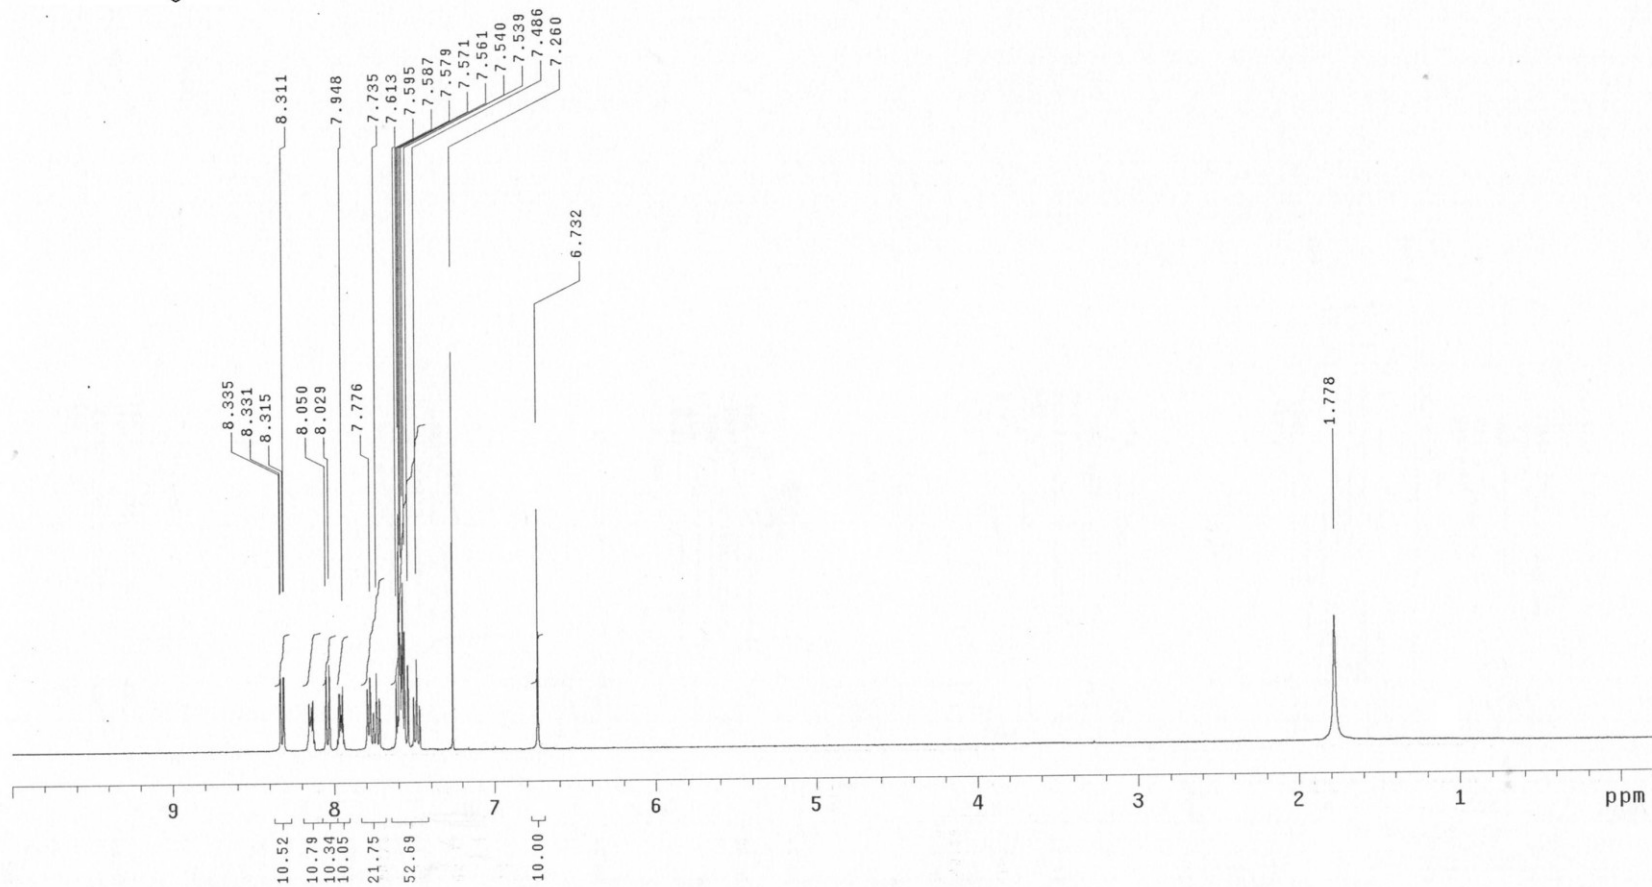

# Compound 4s (<sup>13</sup>C-NMR spectral data)

MC0827

Pulse Sequence: s2pu1  
UNITYplus-400 "unity400"  
Date: Aug 29 2019  
Solvent: CDCl3  
Ambient temperature  
Total 3584 repetitions

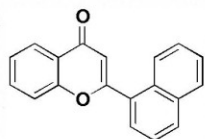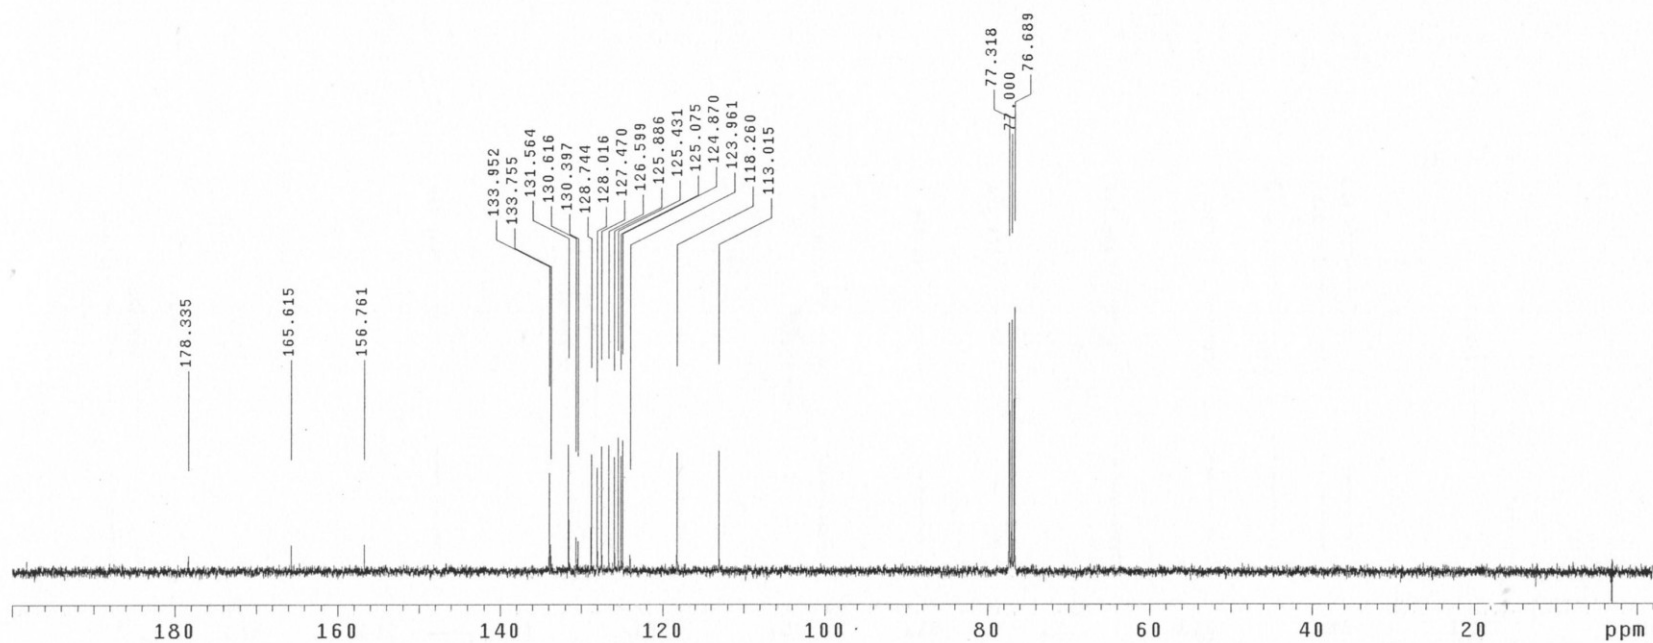

# Compound 4t (<sup>1</sup>H-NMR spectral data)

MC0819

Pulse Sequence: s2pu1  
UNITYplus-400 "unity400"  
Date: Aug 21 2019  
Solvent: CDCl<sub>3</sub>  
Ambient temperature  
Total 32 repetitions

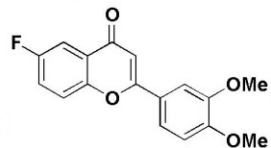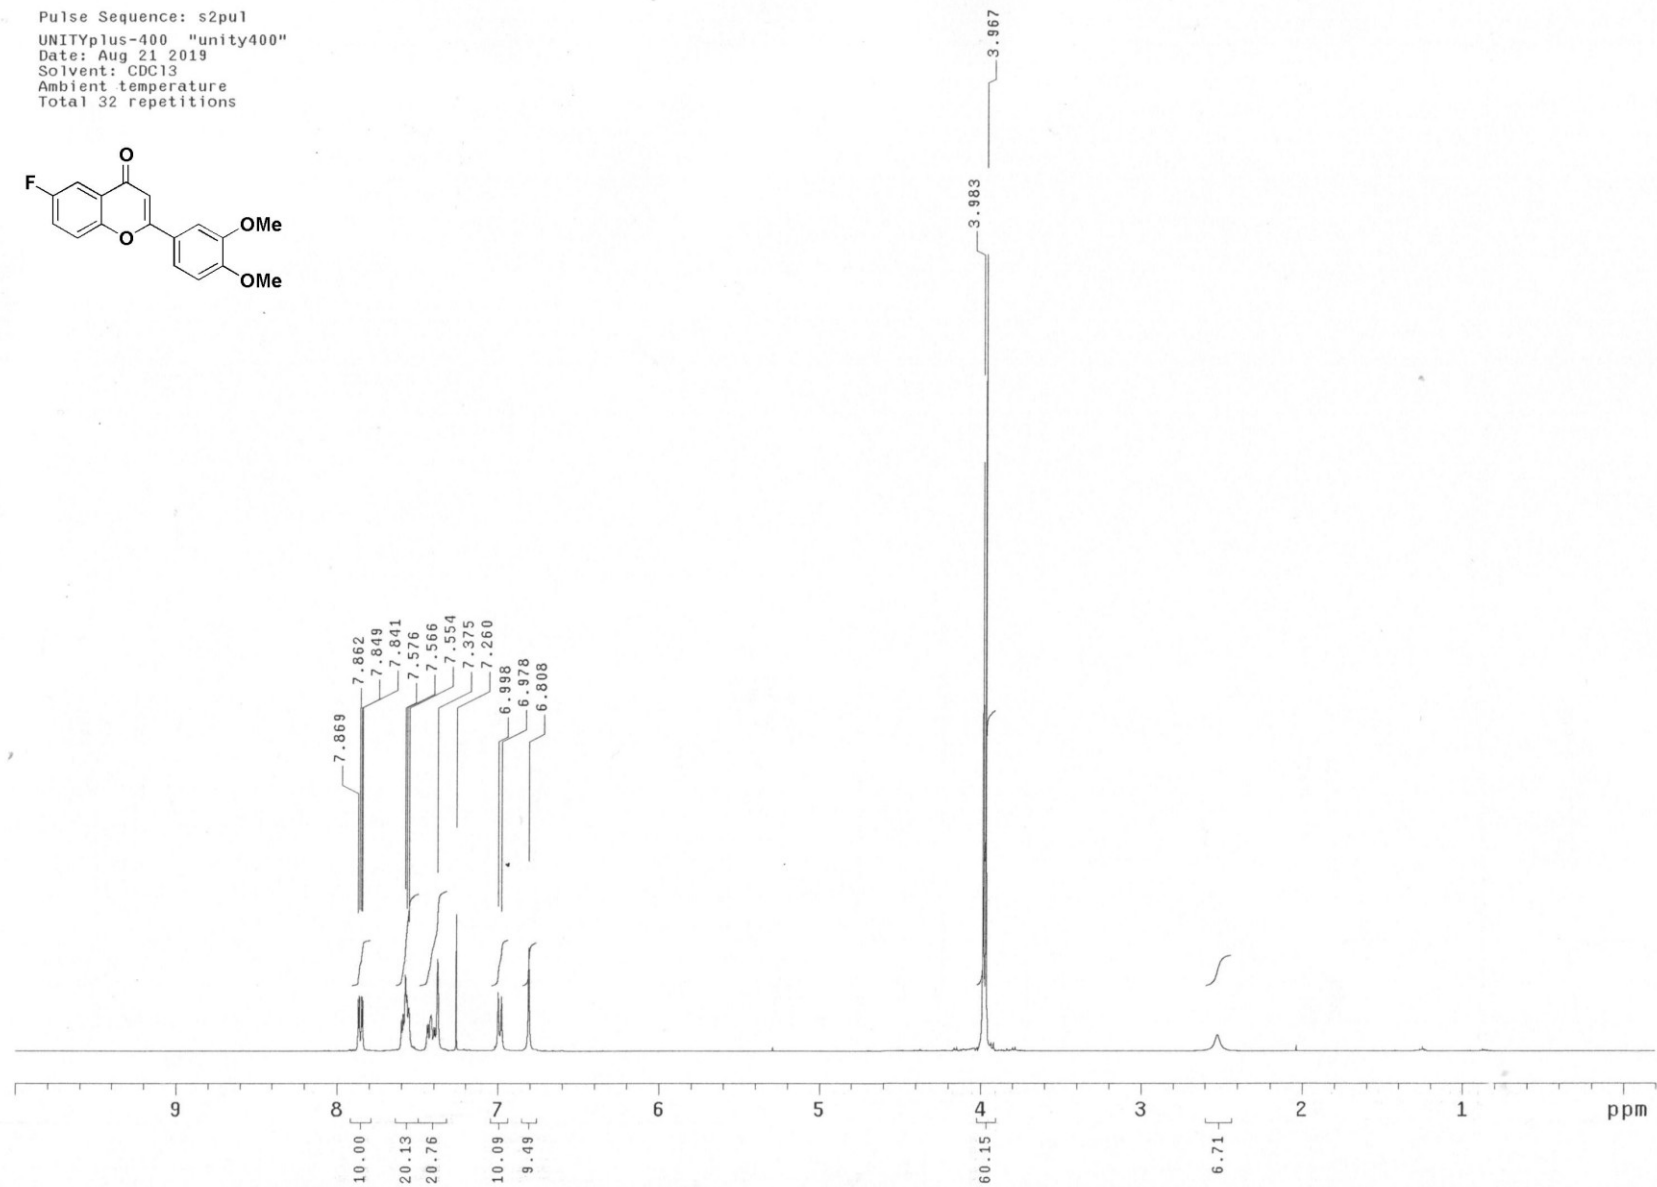



# Compound 4t (<sup>13</sup>C-NMR spectral data)

MC0819

Pulse Sequence: s2pu1  
UNITYplus-400 "unity400"  
Date: Aug 21 2019  
Solvent: CDCl<sub>3</sub>  
Ambient temperature  
Total 2624 repetitions

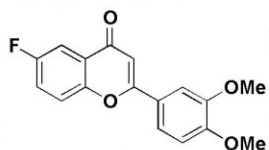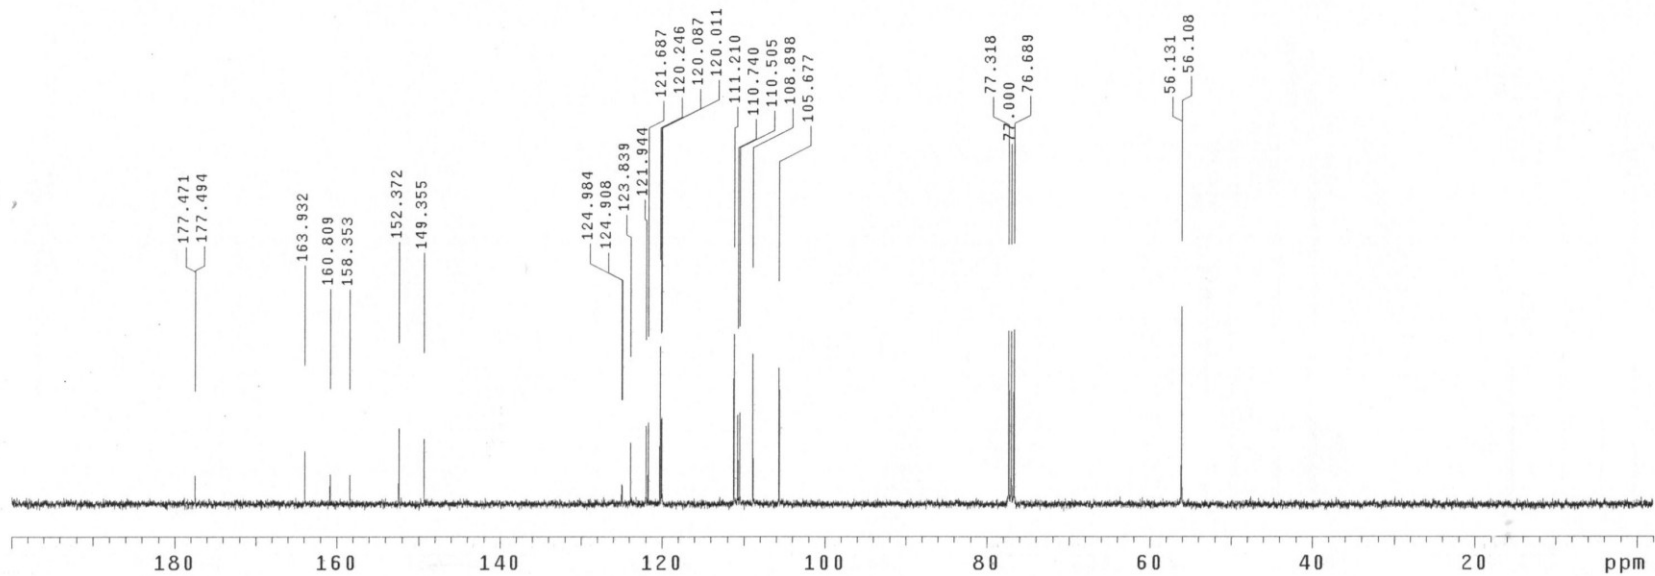

# Compound 4u (<sup>1</sup>H-NMR spectral data)

MC0814

Pulse Sequence: s2pu1  
UNITYplus-400 "unity400"  
Date: Aug 15 2019  
Solvent: CDCl<sub>3</sub>  
Ambient temperature  
Total 32 repetitions

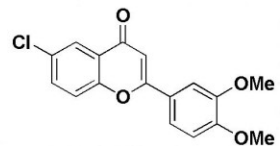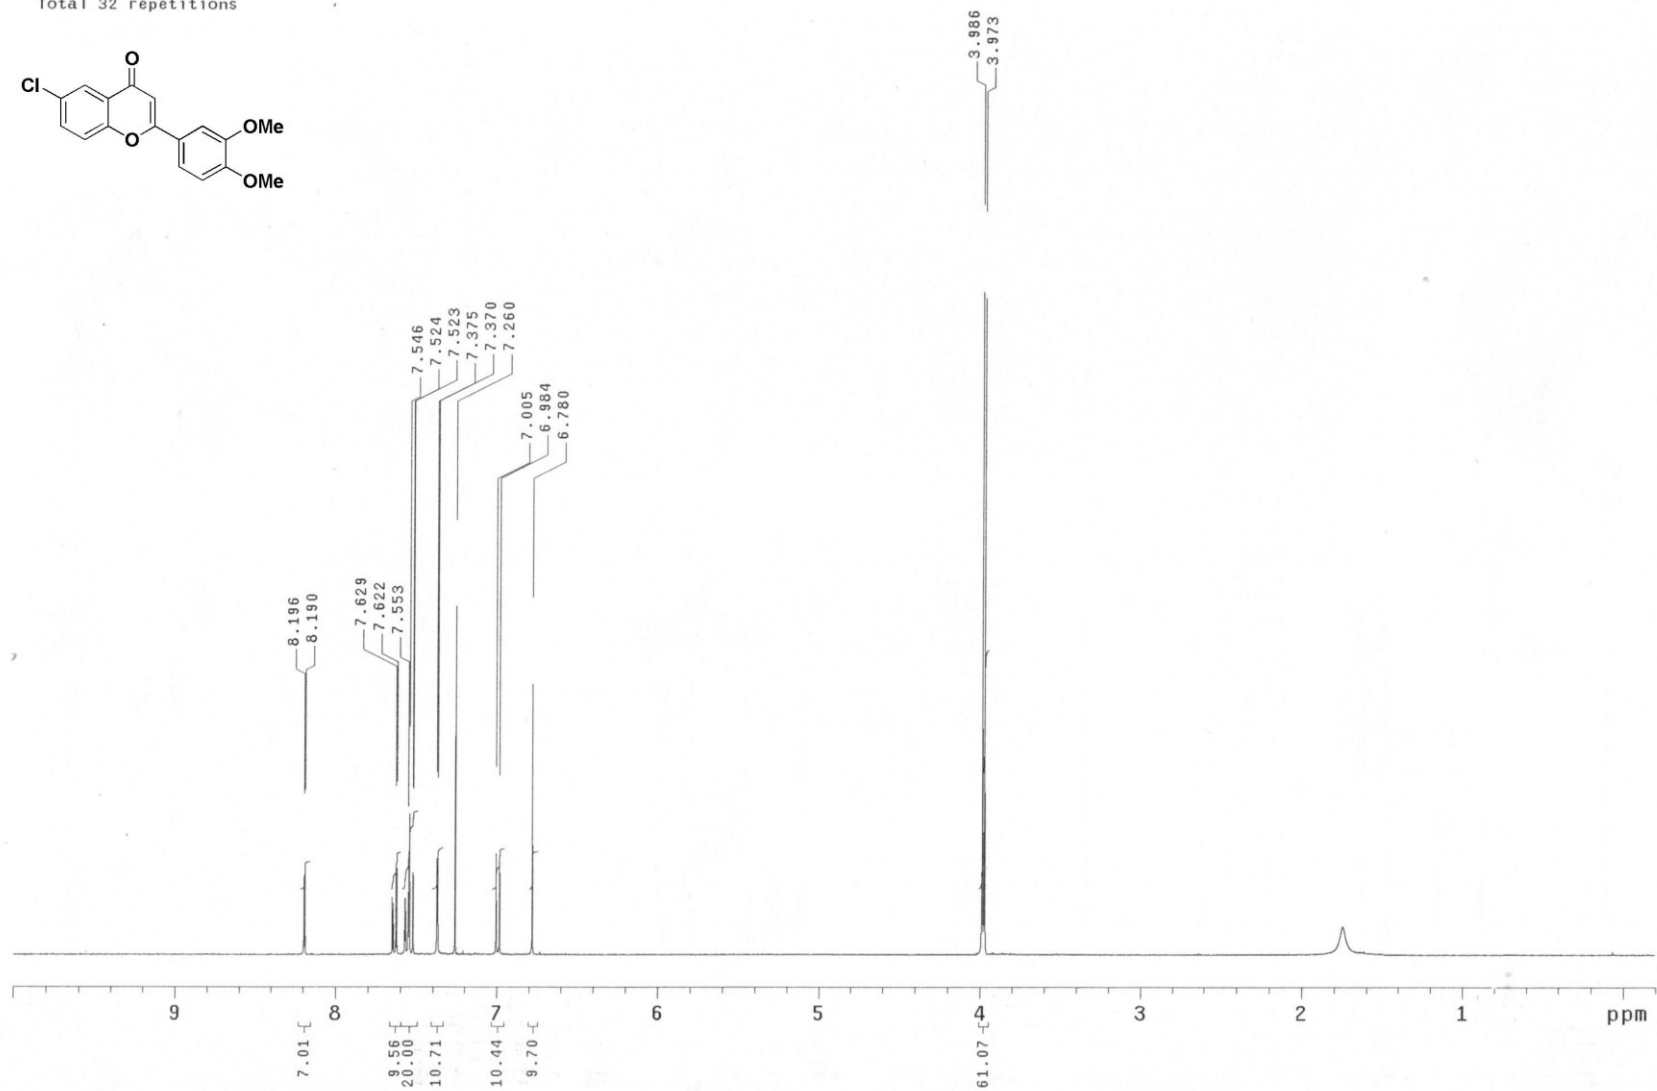

# Compound 4u (<sup>13</sup>C-NMR spectral data)

MC0814

Pulse Sequence: s2pu1  
UNITYplus-400 "unity400"  
Date: Aug 15 2019  
Solvent: CDCl<sub>3</sub>  
Ambient temperature  
Total 11536 repetitions

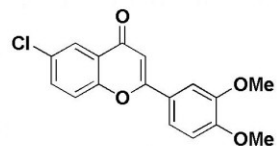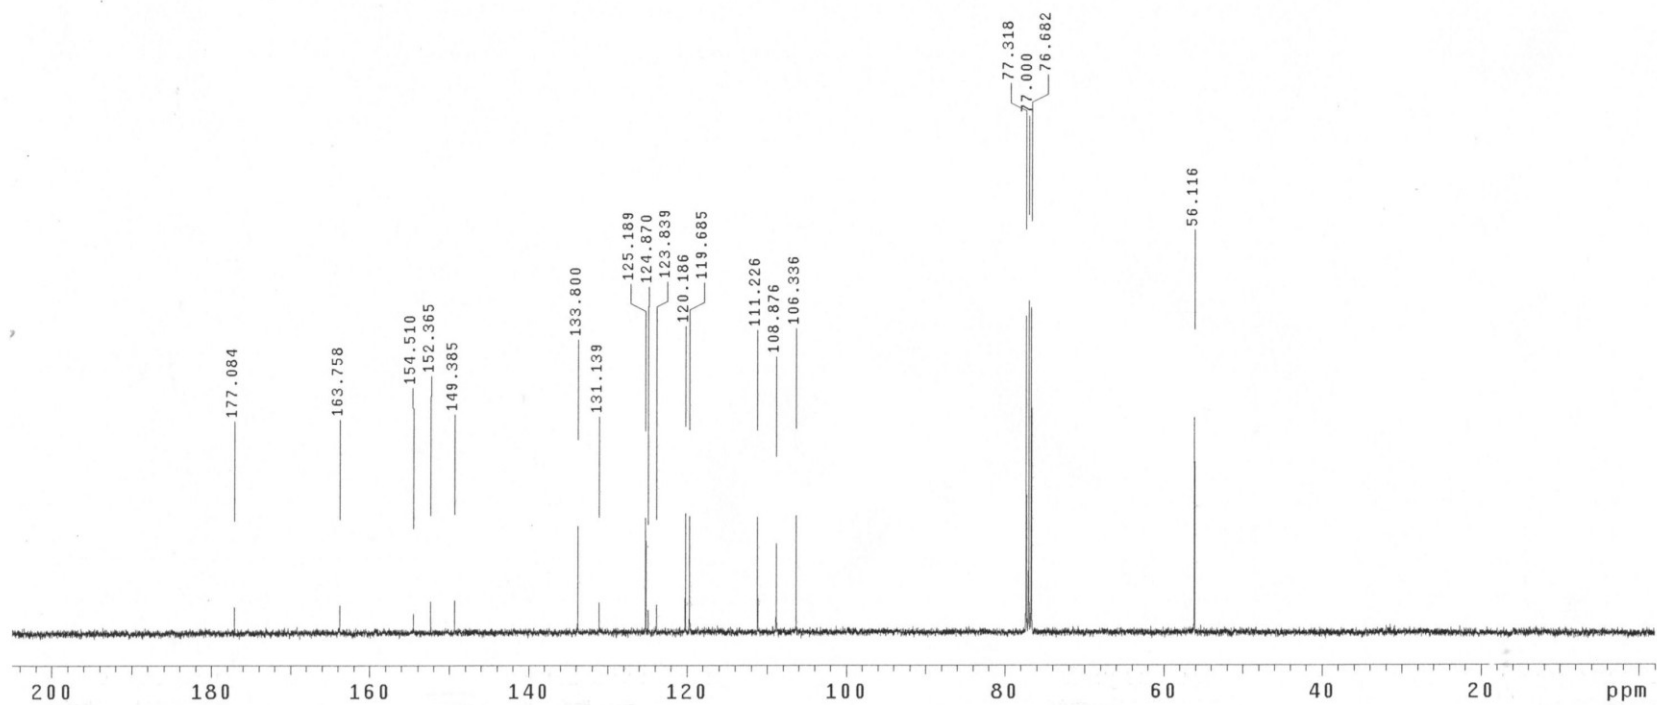

# Compound 4v (<sup>1</sup>H-NMR spectral data)

MC0826

Pulse Sequence: s2pu1

UNITYplus-400 "unity400"

Date: Aug 27 2019

Solvent: CDCl<sub>3</sub>

Ambient temperature

Total 32 repetitions

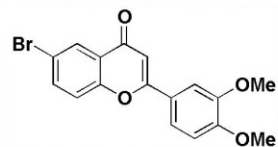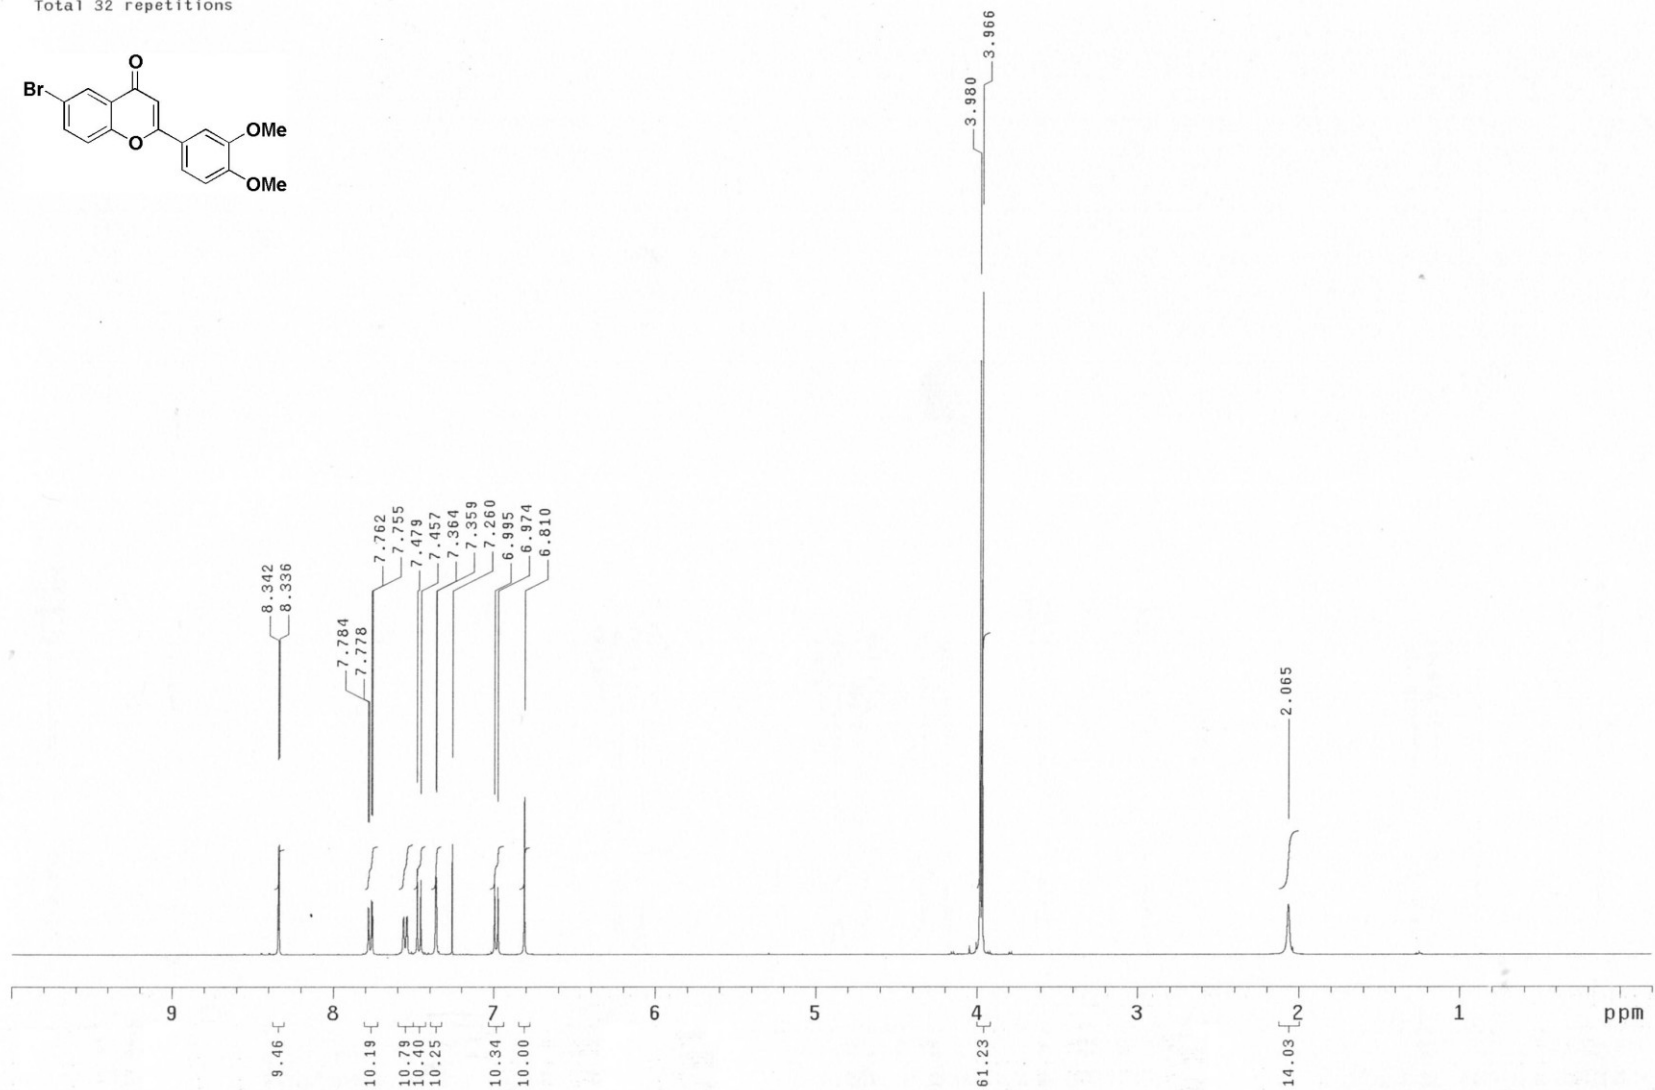

# Compound 4v (<sup>13</sup>C-NMR spectral data)

MC0826

Pulse Sequence: s2pu1  
UNITYplus-400 "unity400"  
Date: Aug 27 2019  
Solvent: CDCl<sub>3</sub>  
Ambient temperature  
Total 2048 repetitions

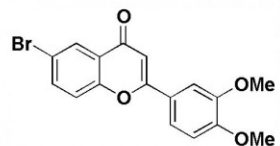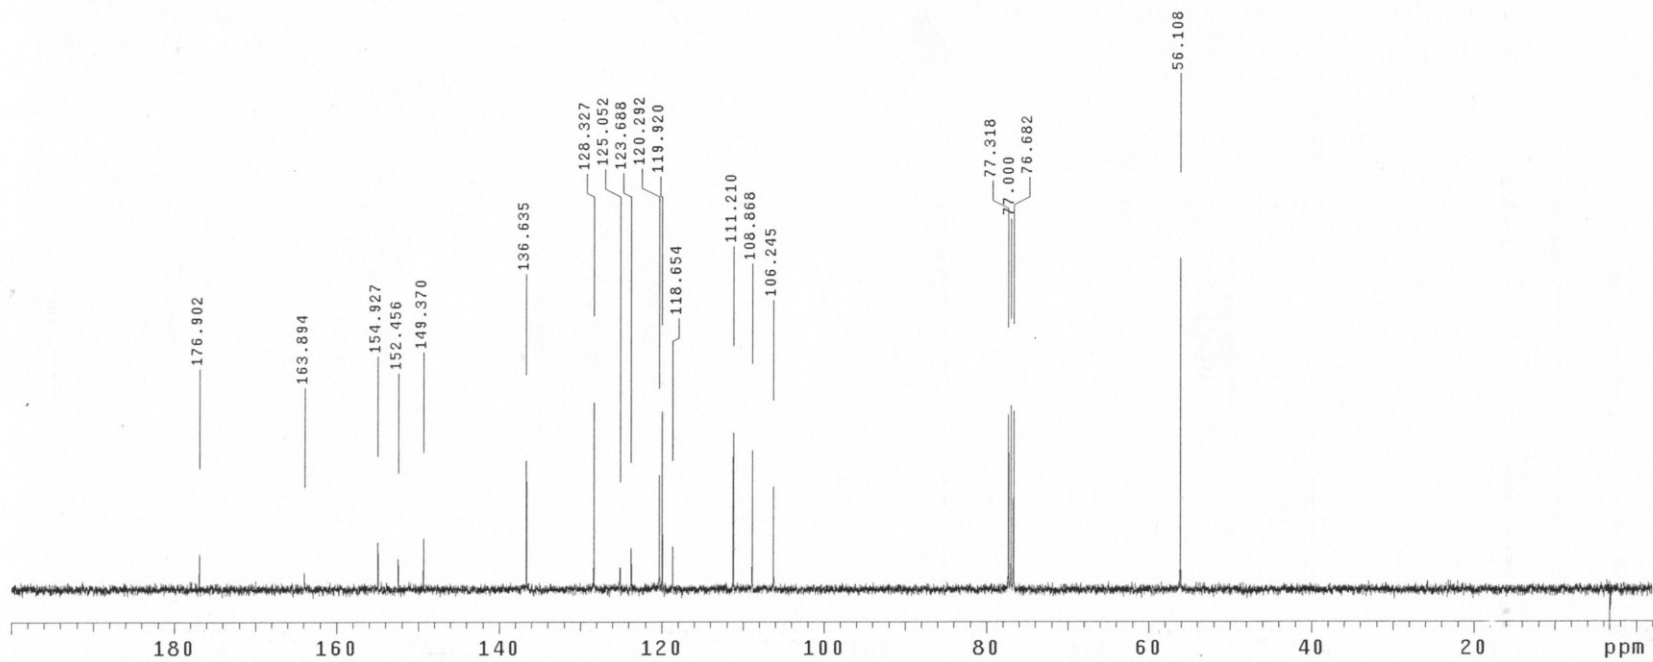

# Compound 4w (<sup>1</sup>H-NMR spectral data)

MC0823

Pulse Sequence: s2pu1  
UNITYplus-400 "unity400"  
Date: Aug 27 2019  
Solvent: CDCl3  
Ambient temperature  
Total 112 repetitions

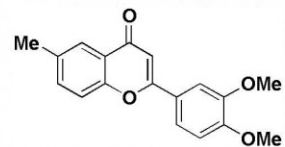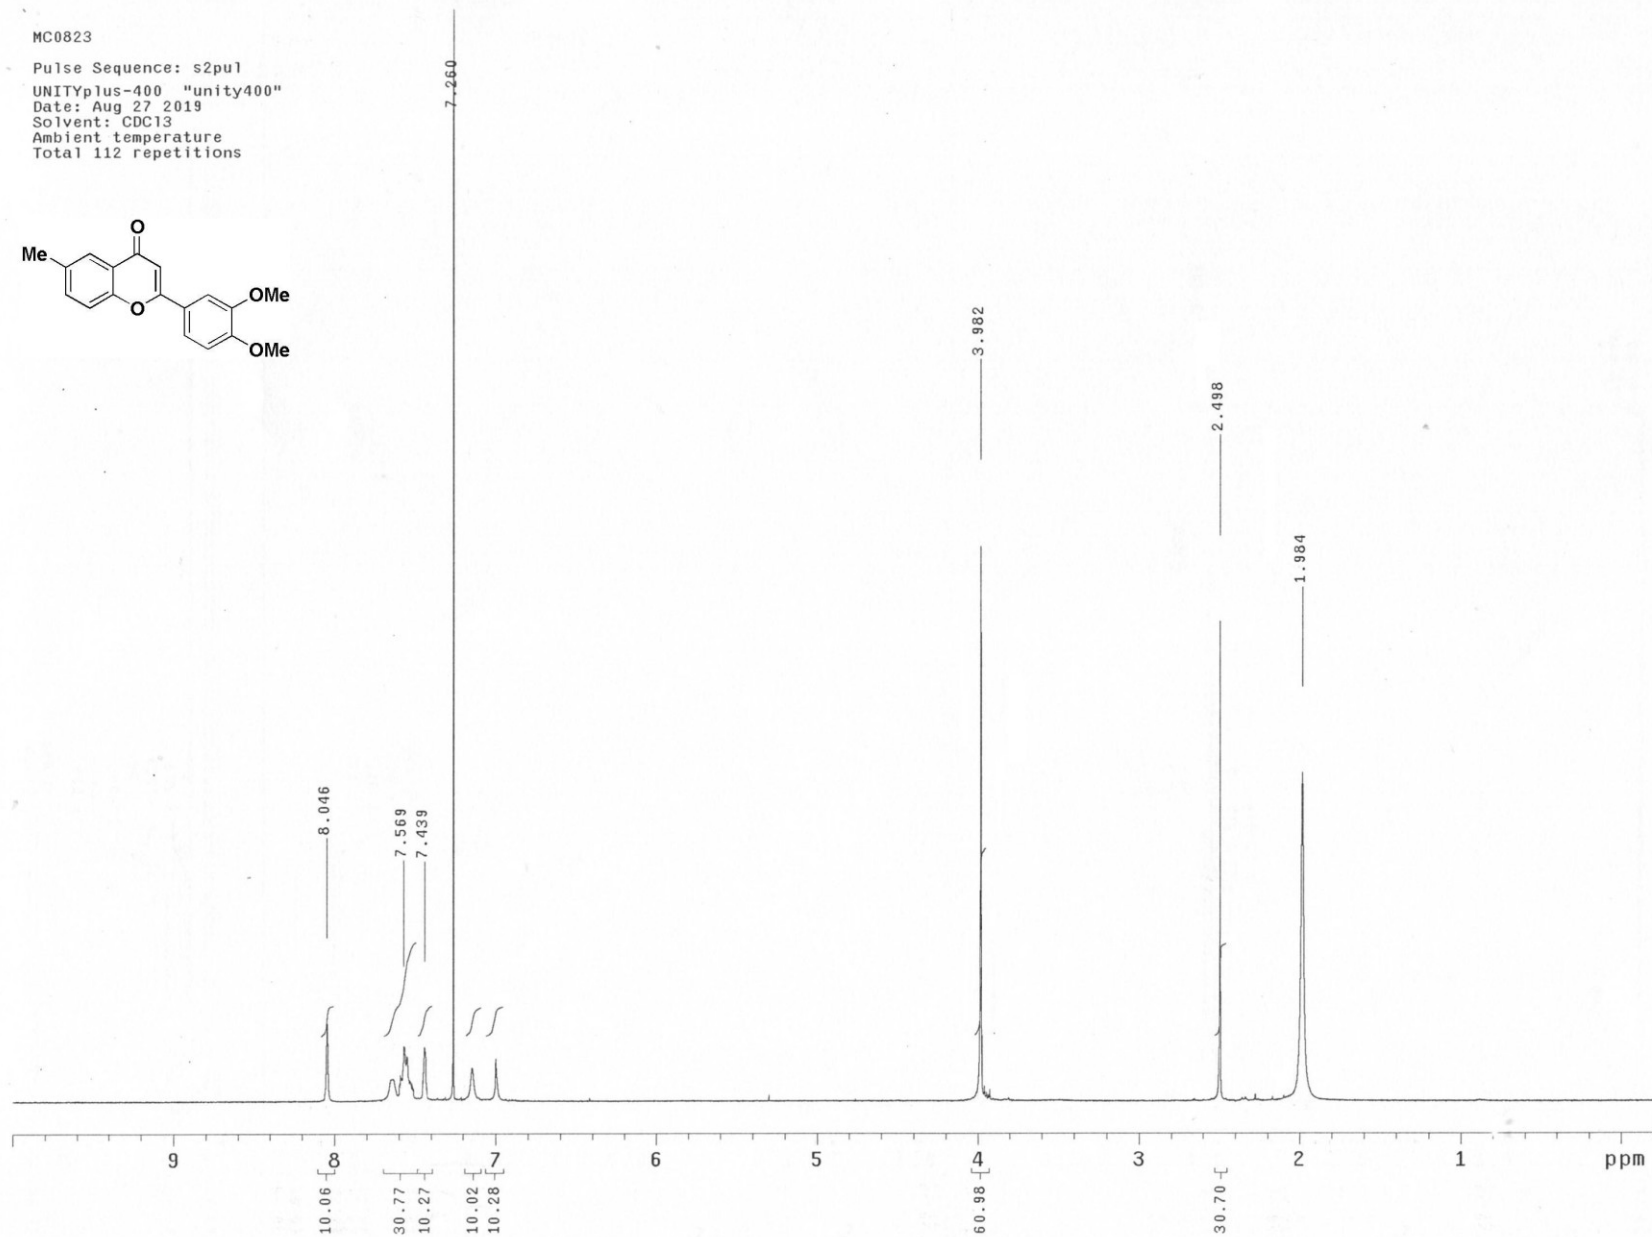

# Compound 4w (<sup>13</sup>C-NMR spectral data)

MC0823

Pulse Sequence: s2pu1

UNITYplus-400 "unity400"

Date: Aug 27 2019

Solvent: CDCl<sub>3</sub>

Ambient temperature

Total 32000 repetitions

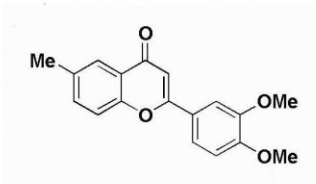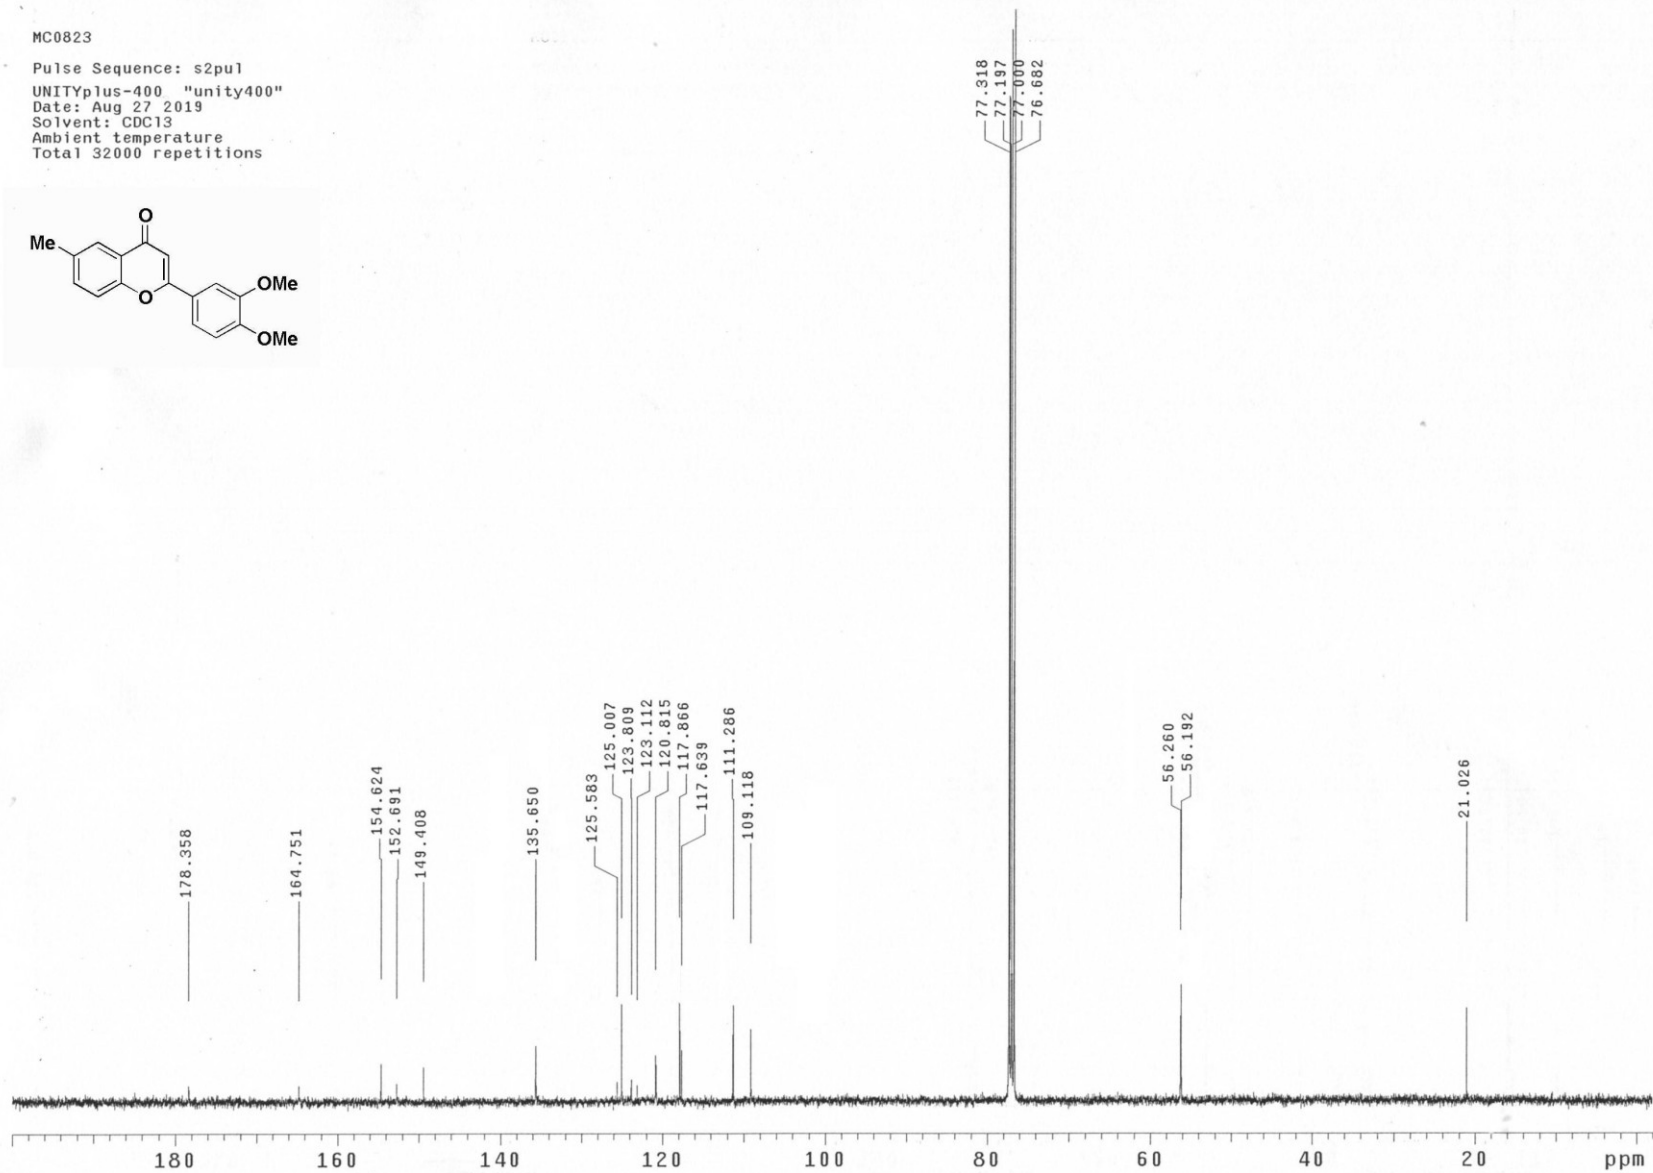

# Compound 4x (<sup>1</sup>H-NMR spectral data)

MC0815

Pulse Sequence: s2pu1  
UNITYplus-400 "unity400"  
Date: Aug 19 2019  
Solvent: CDCl<sub>3</sub>  
Ambient temperature  
Total 32 repetitions

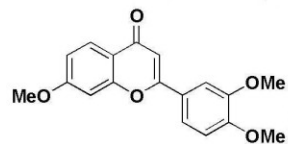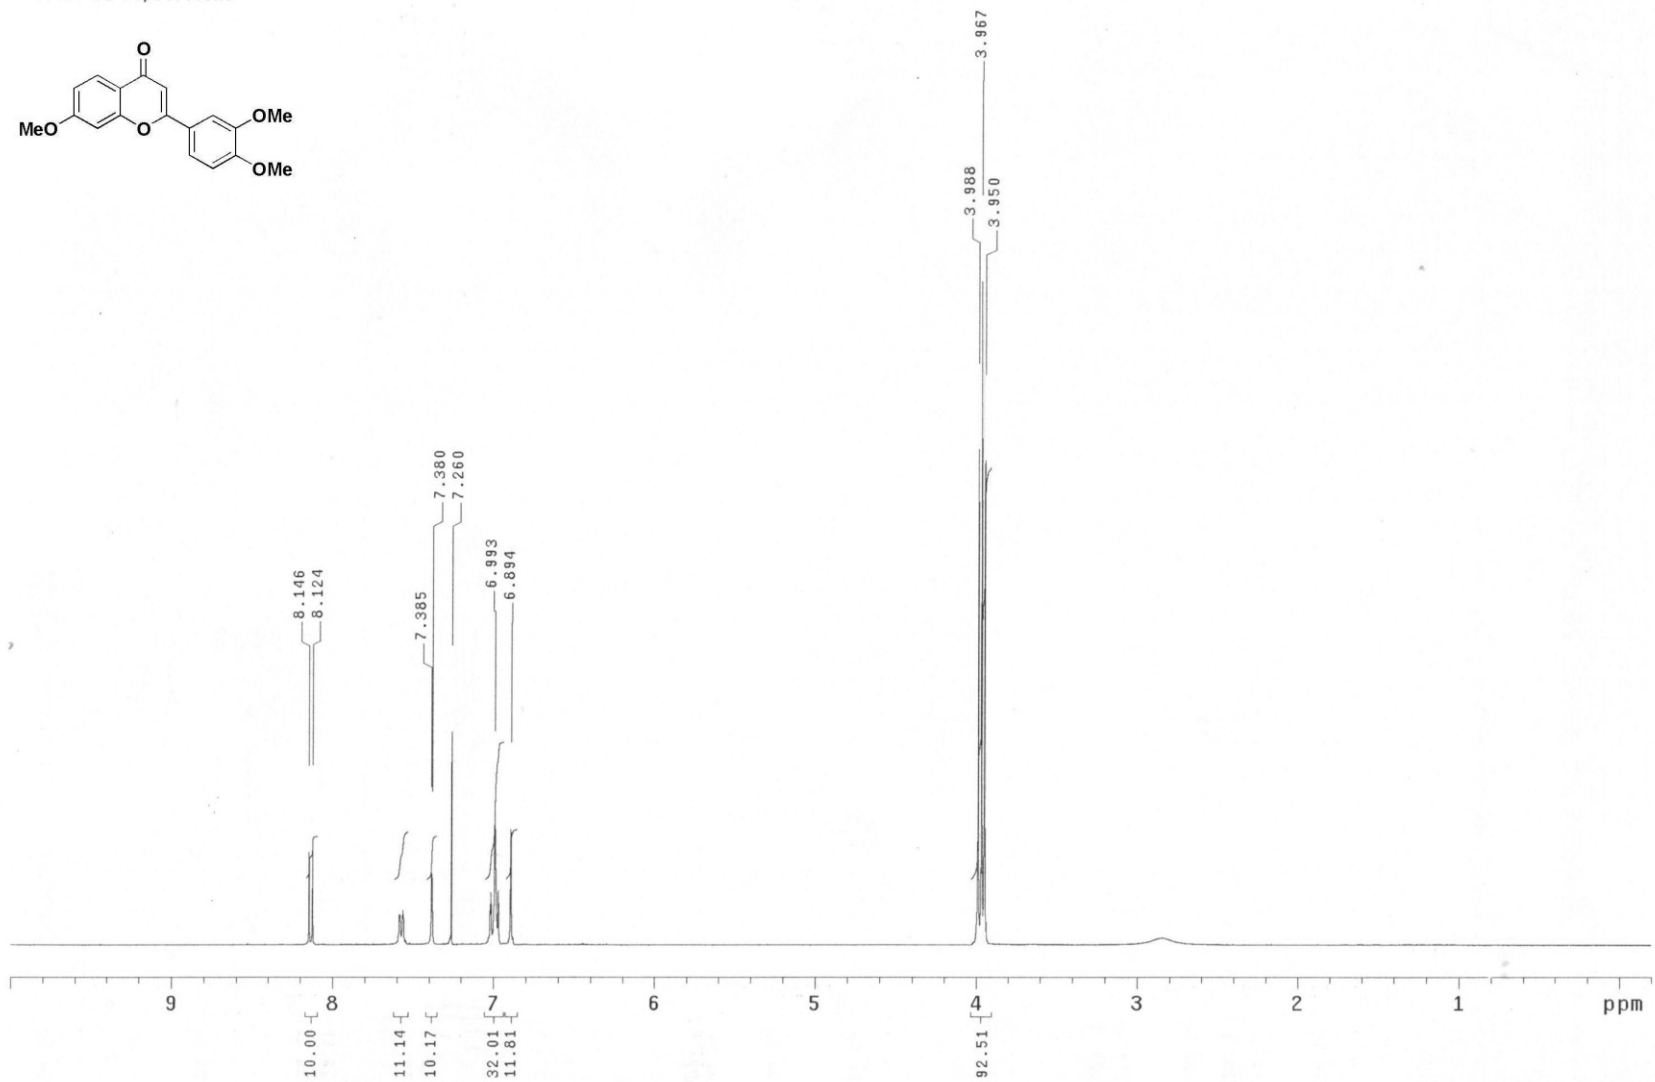



# Compound 4x (<sup>13</sup>C-NMR spectral data)

MC0815

Pulse Sequence: s2pu1

UNITYplus-400 "unity400"

Date: Aug 19 2019

Solvent: CDCl<sub>3</sub>

Ambient temperature

Total 4464 repetitions

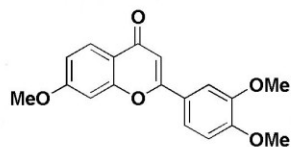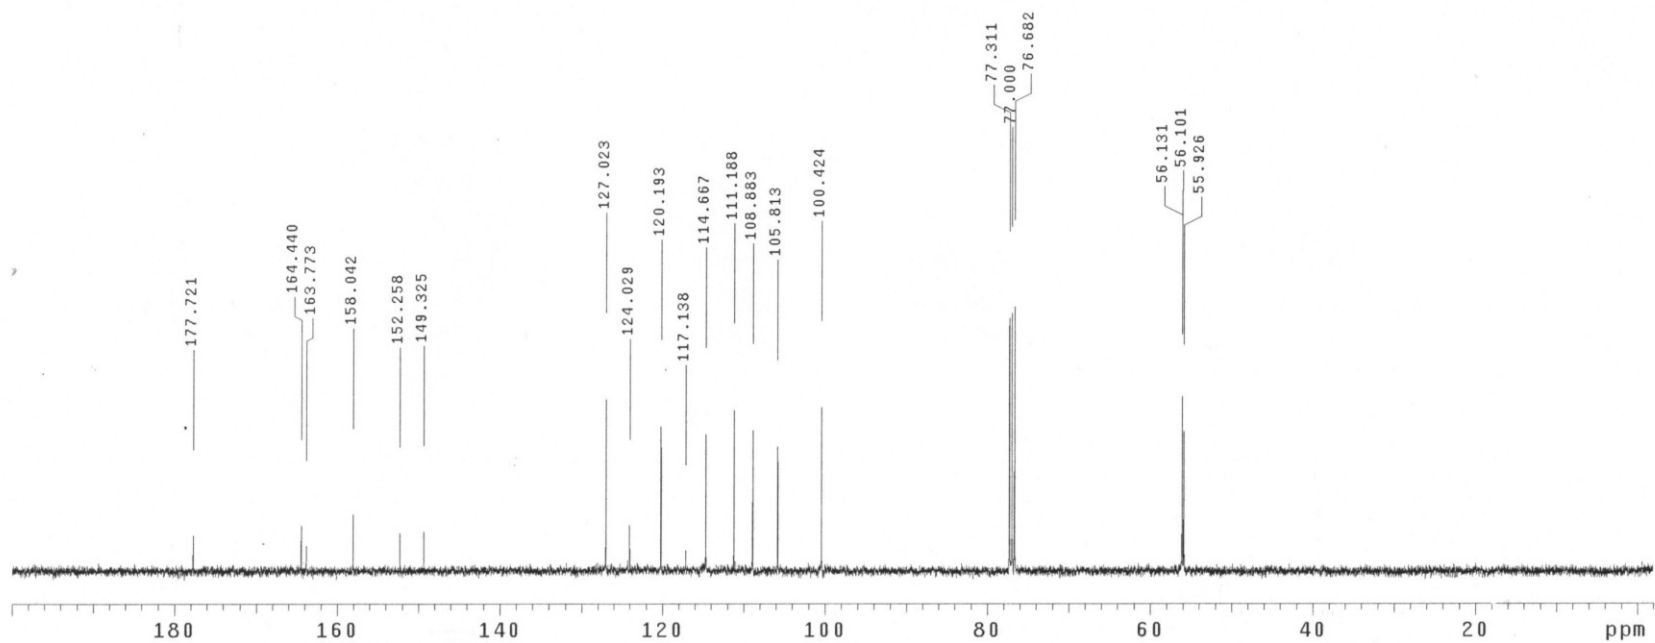

# Compound 4y (<sup>1</sup>H-NMR spectral data)

MC0310

Pulse Sequence: s2pu1

UNITYplus-400 "unity400"

Date: Mar 10 2021

Solvent: CDC13

Ambient temperature

Total 32 repetitions

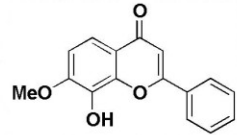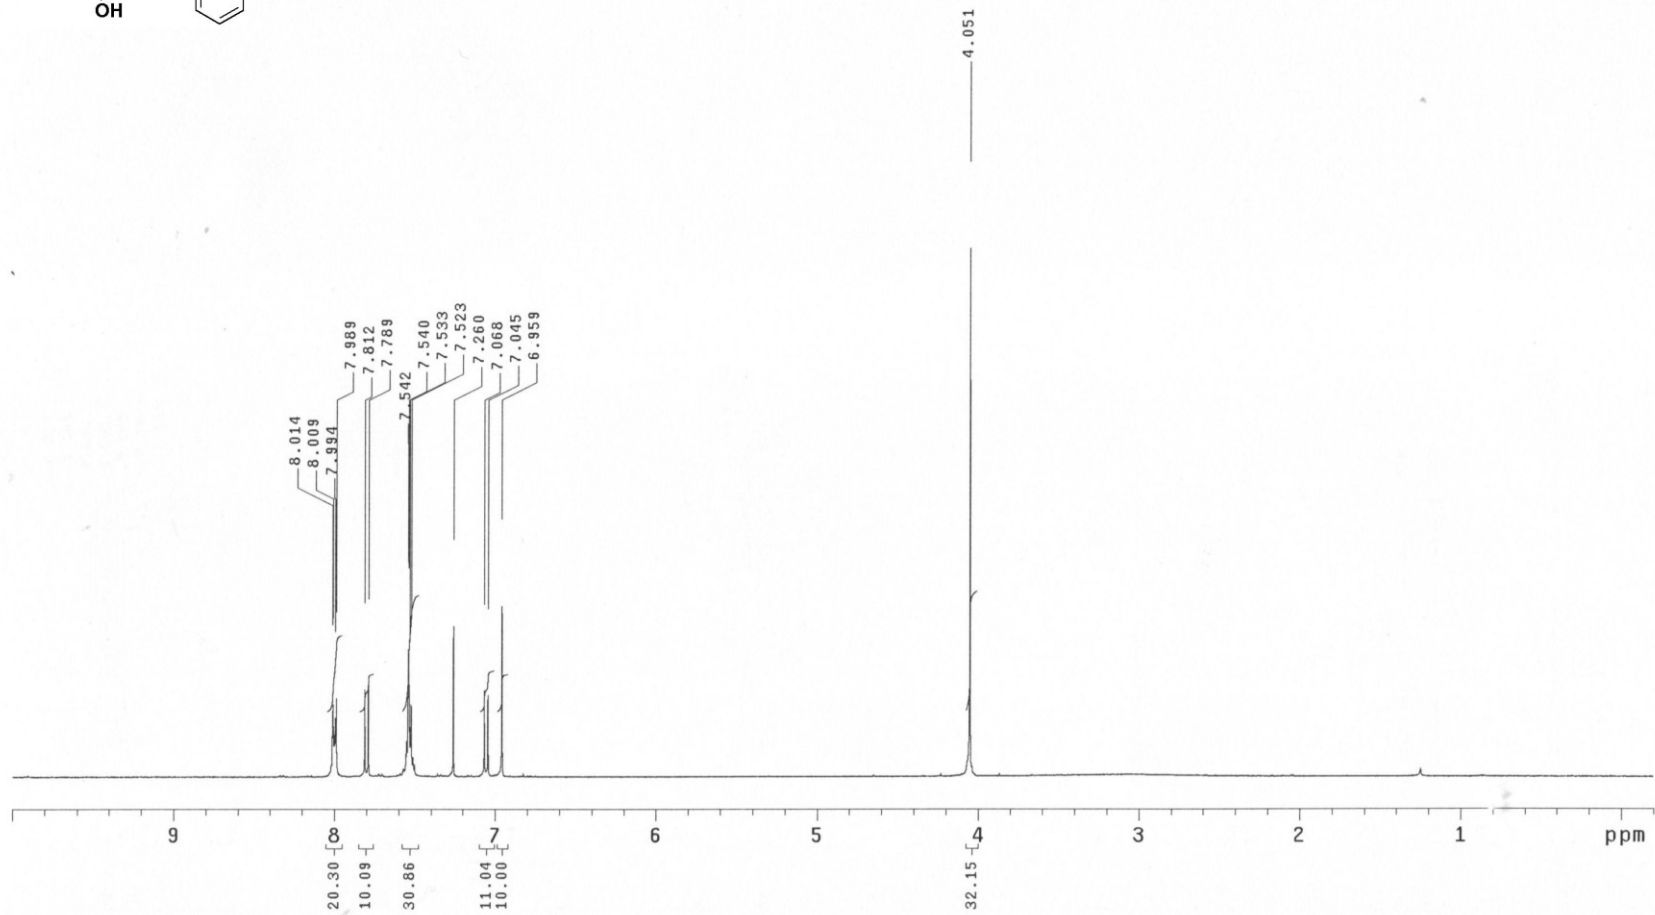

# Compound 4y (<sup>13</sup>C-NMR spectral data)

MC0310

Pulse Sequence: s2pu1

UNITYplus-400 "unity400"

Date: Mar 10 2021

Solvent: CDCl<sub>3</sub>

Ambient temperature

Total 40080 repetitions

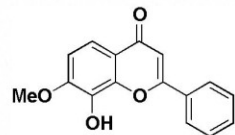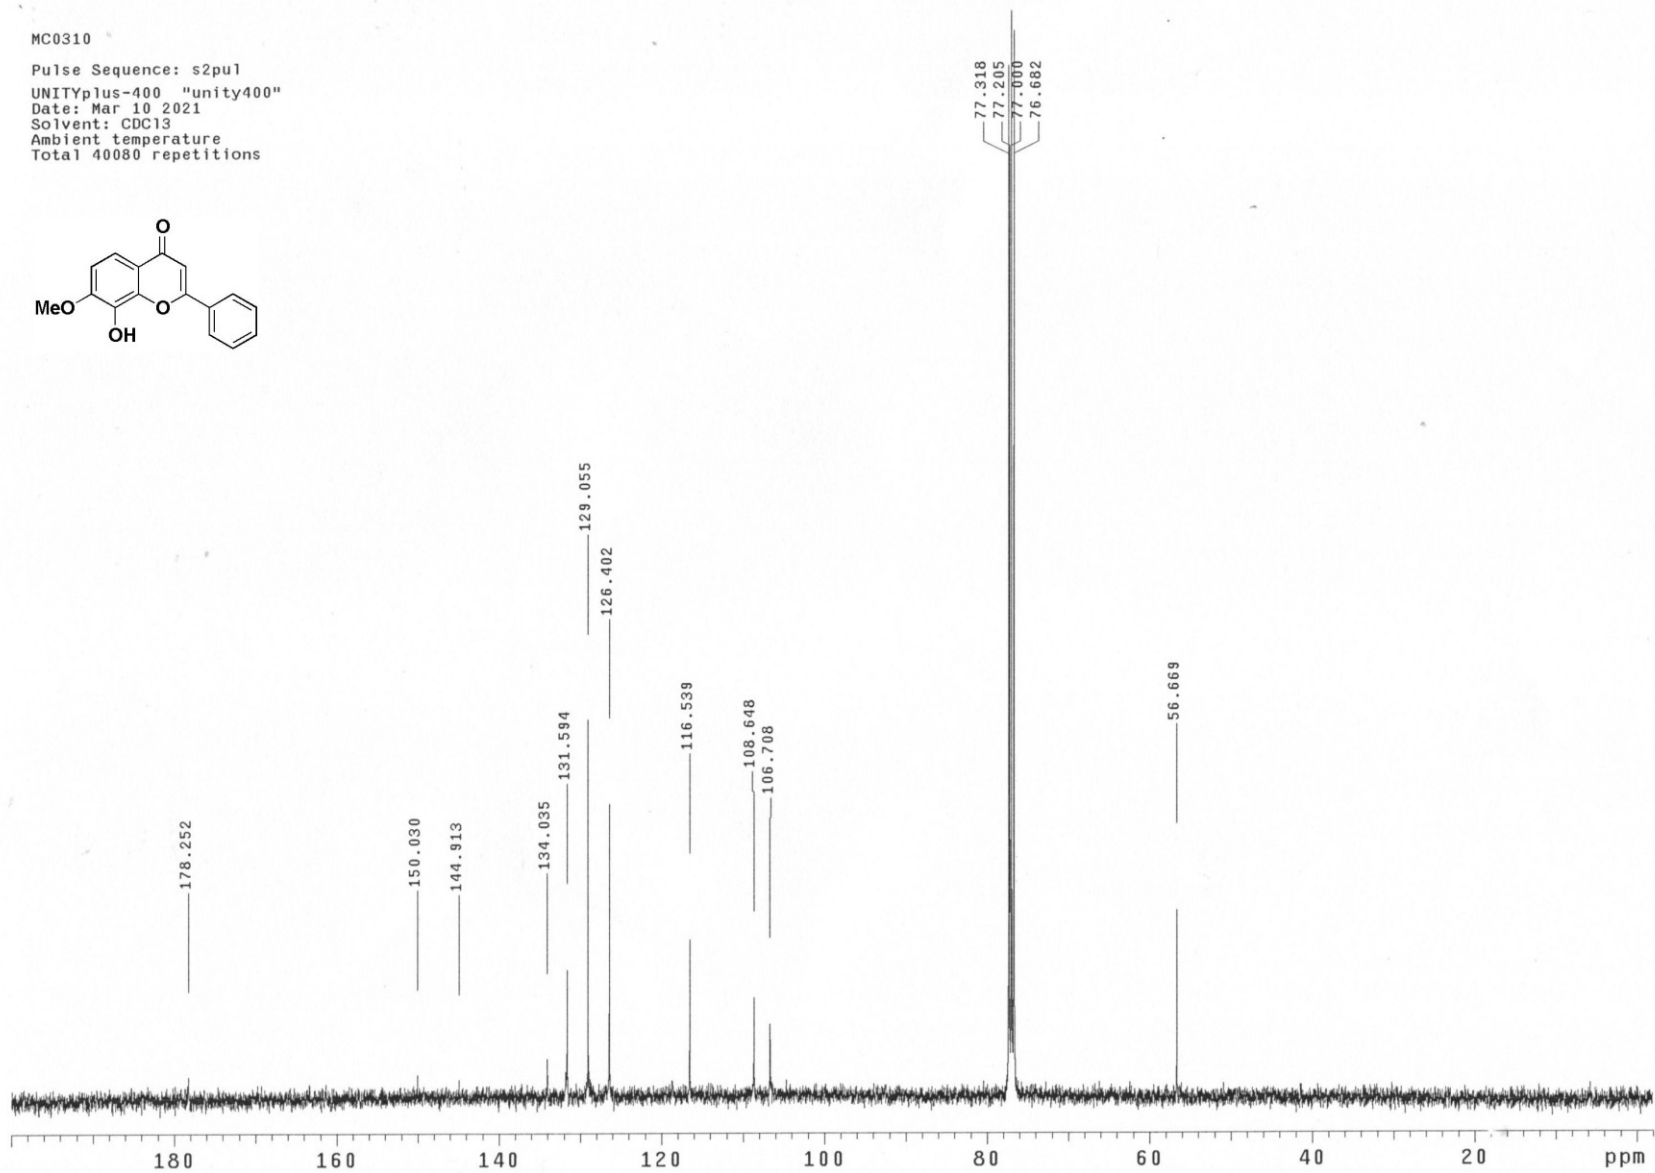

# Compound 3q (<sup>1</sup>H-NMR spectral data)

MC0805

Pulse Sequence: s2pu1  
UNITYplus-400 "unity400"  
Date: Aug 7 2019  
Solvent: CDC13  
Ambient temperature  
Total 32 repetitions

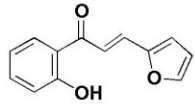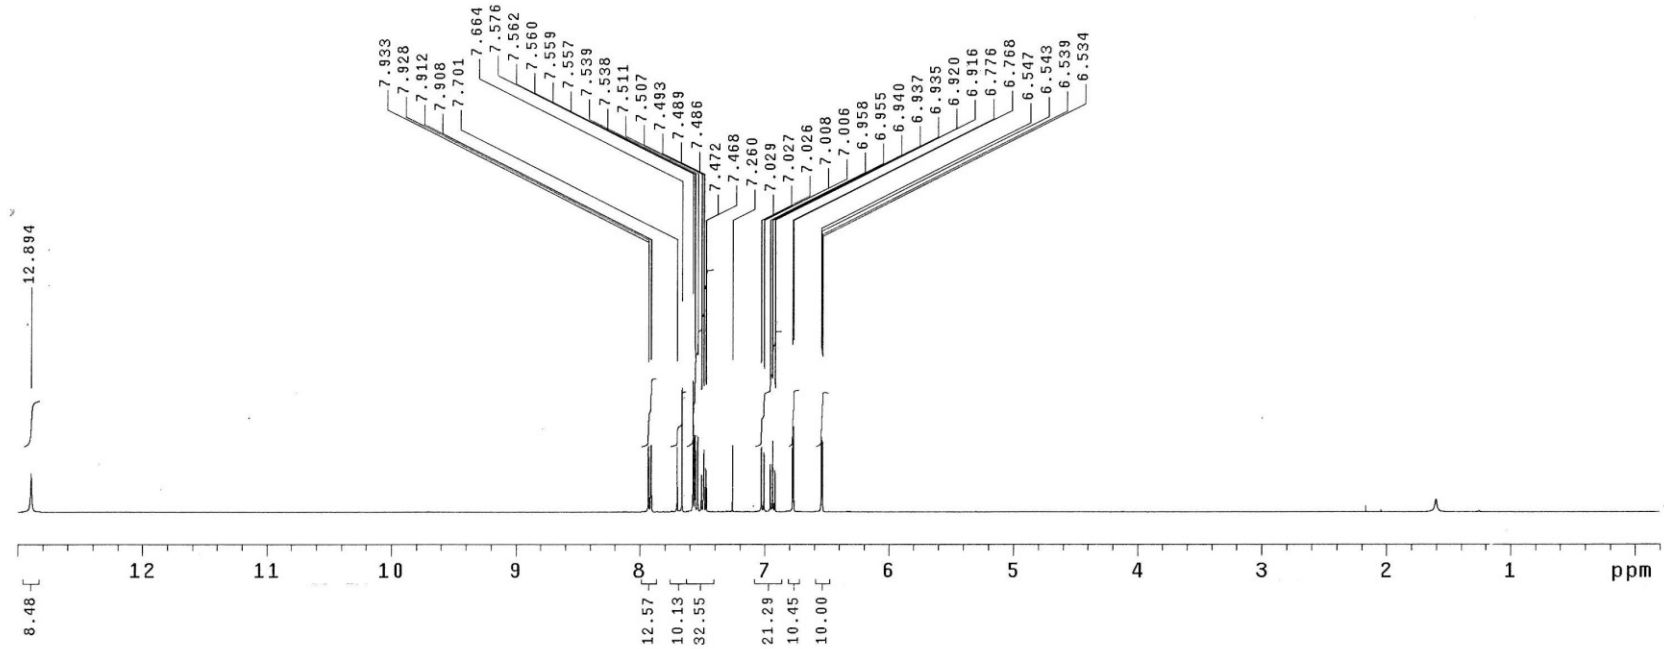

# Compound 3q (<sup>13</sup>C-NMR spectral data)

MC0805

Pulse Sequence: s2pu1  
UNITYplus-400 "unity400"  
Date: Aug 7 2019  
Solvent: CDCl<sub>3</sub>  
Ambient temperature  
Total 1120 repetitions

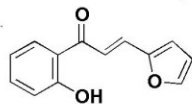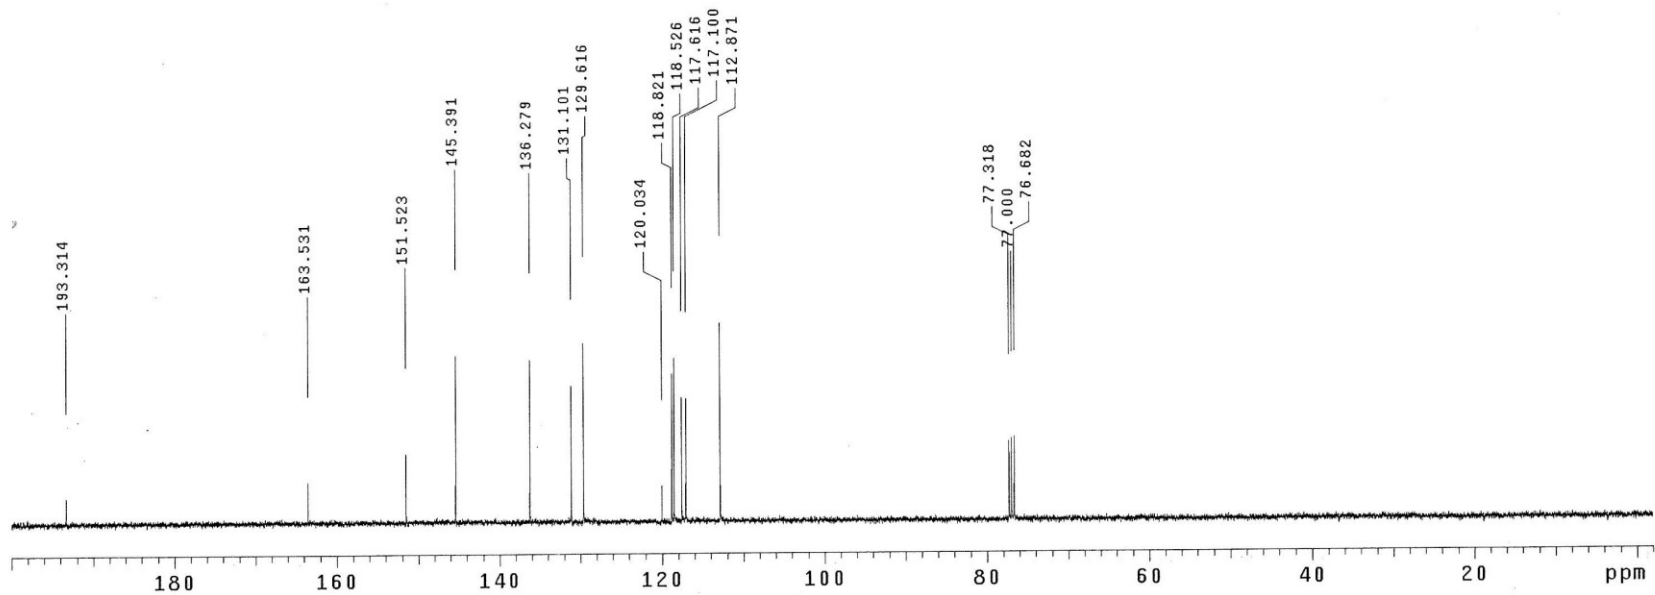

# Compound 5a (<sup>1</sup>H-NMR spectral data)

YE0810

Pulse Sequence: s2pu1  
UNITYplus-400 "unity400"  
Date: Aug 9 2019  
Solvent: CDC13  
Ambient temperature  
Total 32 repetitions

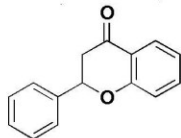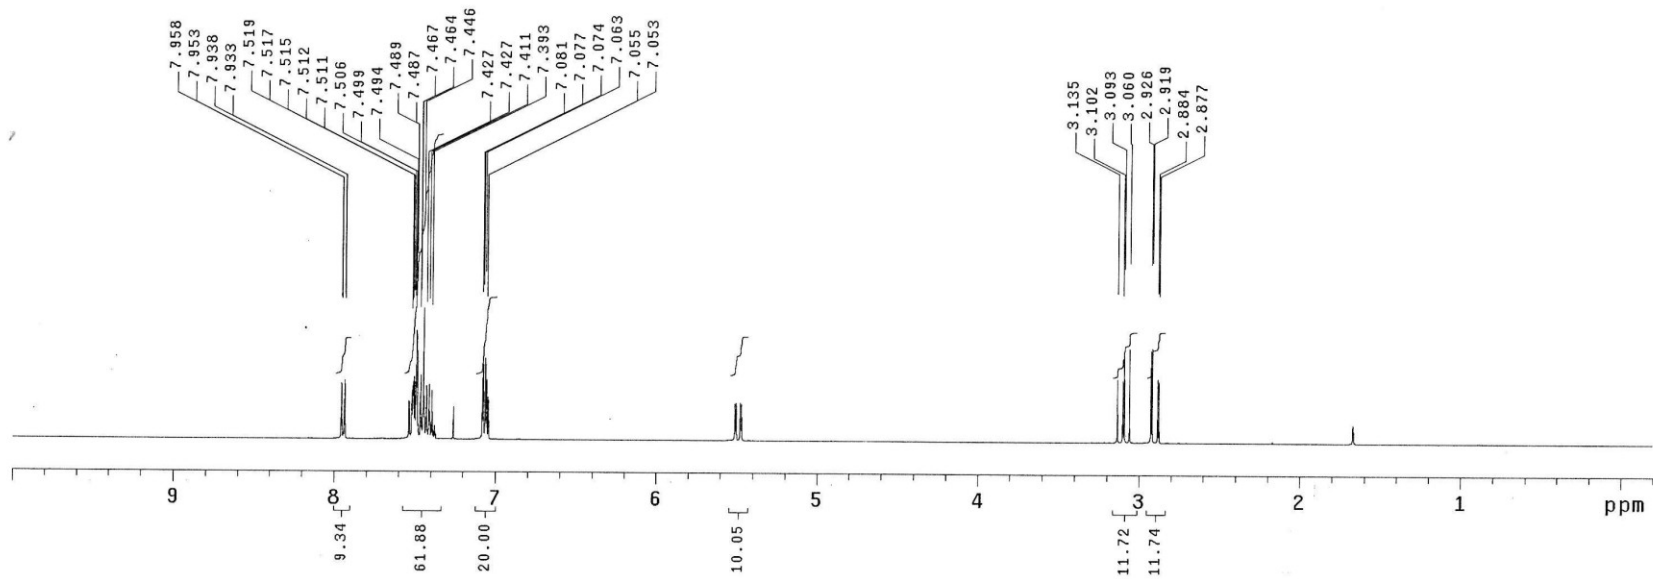

# Compound 5a (<sup>13</sup>C-NMR spectral data)

YE0810

Pulse Sequence: s2pu1

UNITYplus-400 "unity400"

Date: Aug 9 2019

Solvent: CDCl<sub>3</sub>

Ambient temperature

Total 640 repetitions

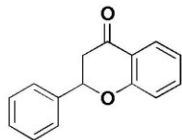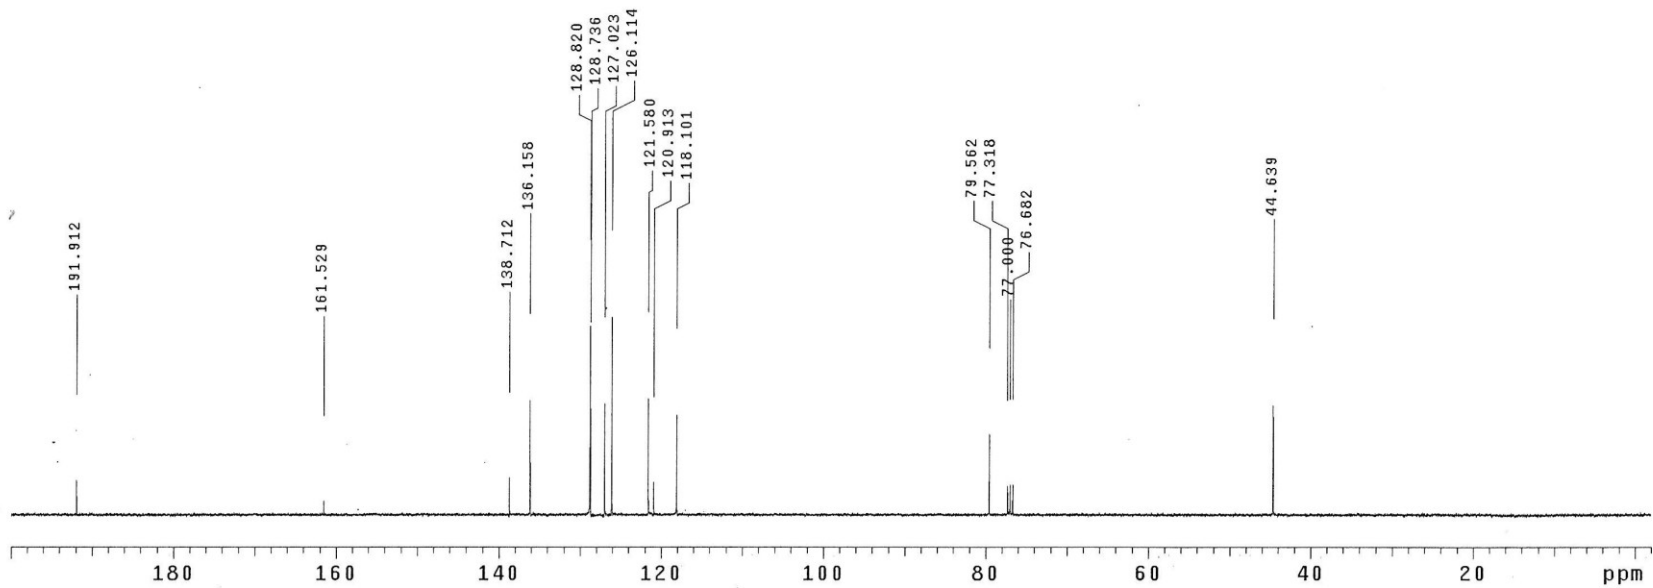

# Compound 6a (<sup>1</sup>H-NMR spectral data)

MC918

Pulse Sequence: s2pu1  
UNITYplus-400 "unity400"  
Date: Sep 19 2019  
Solvent: CDCl<sub>3</sub>  
Ambient temperature  
Total 32 repetitions

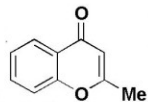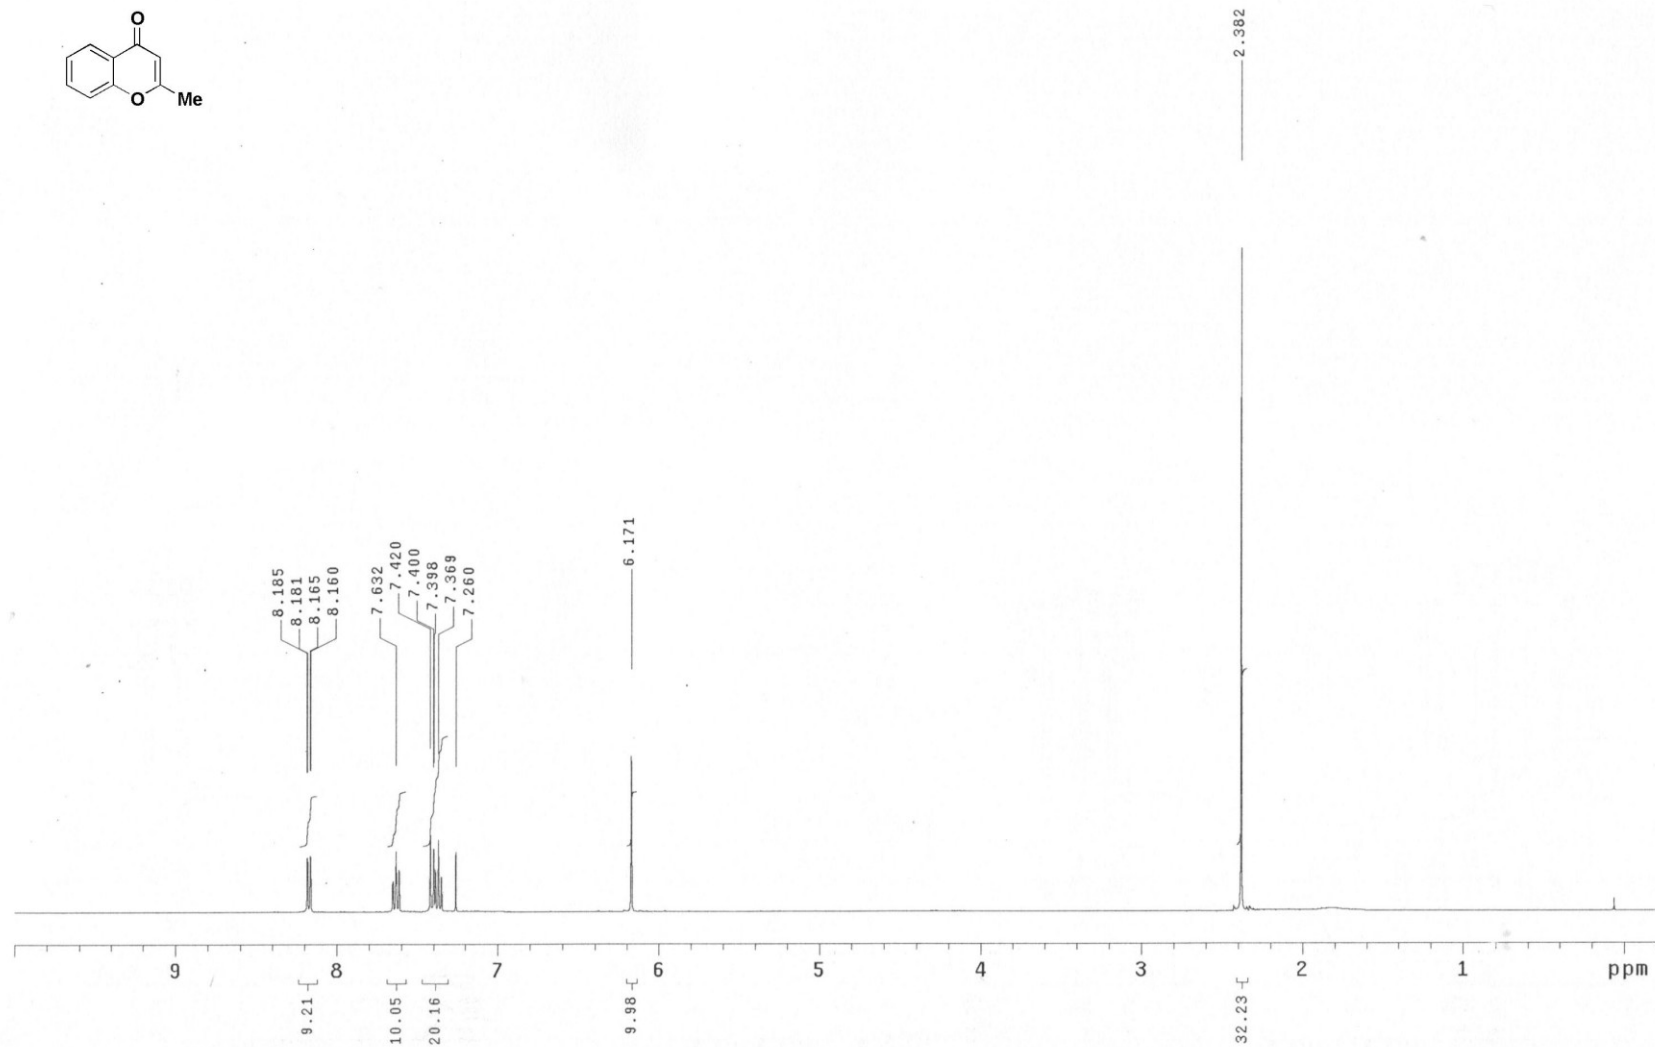



# Compound 6a (<sup>13</sup>C-NMR spectral data)

MC918

Pulse Sequence: s2pu1

UNITYplus-400 "unity400"

Date: Sep 19 2019

Solvent: CDCl<sub>3</sub>

Ambient temperature

Total 2240 repetitions

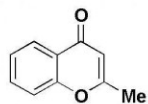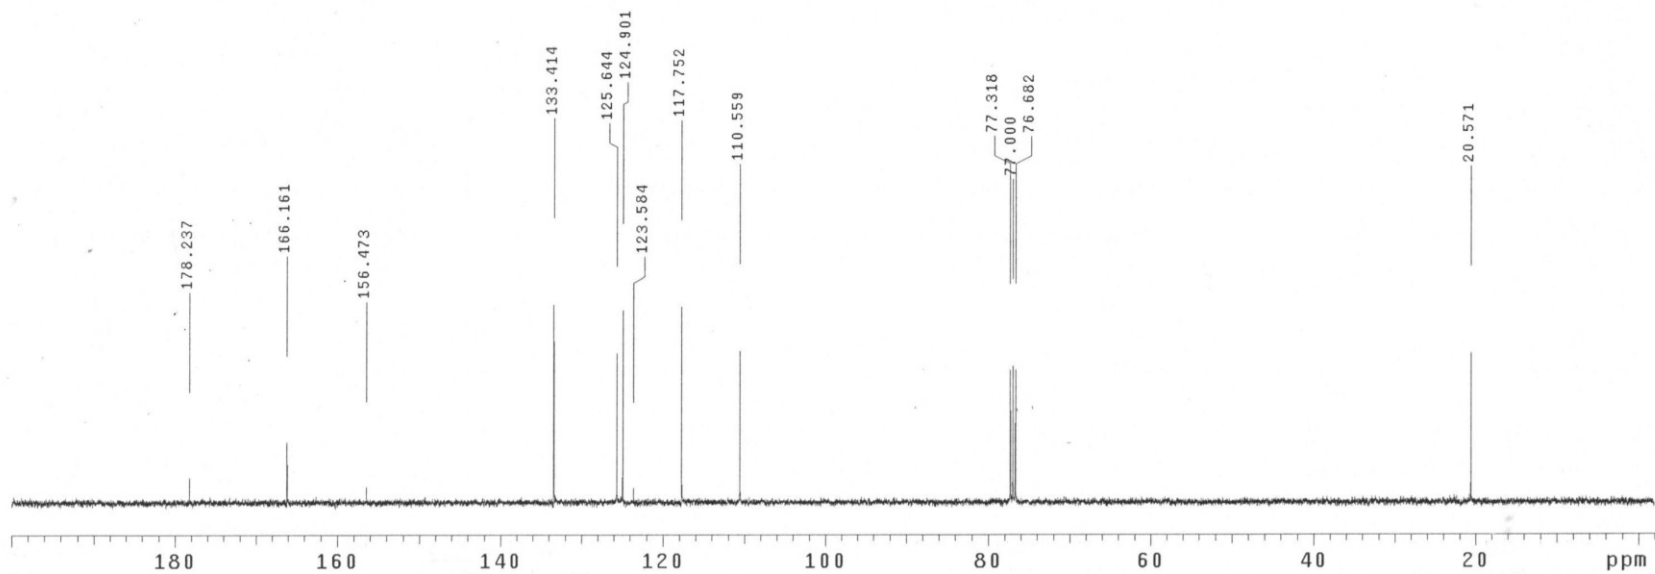

# Compound 7a (<sup>1</sup>H-NMR spectral data)

MC732

Pulse Sequence: s2pu1  
UNITYplus-400 "unity400"  
Date: Sep 6 2019  
Solvent: CDCl<sub>3</sub>  
Ambient temperature  
Total 32 repetitions

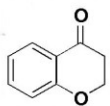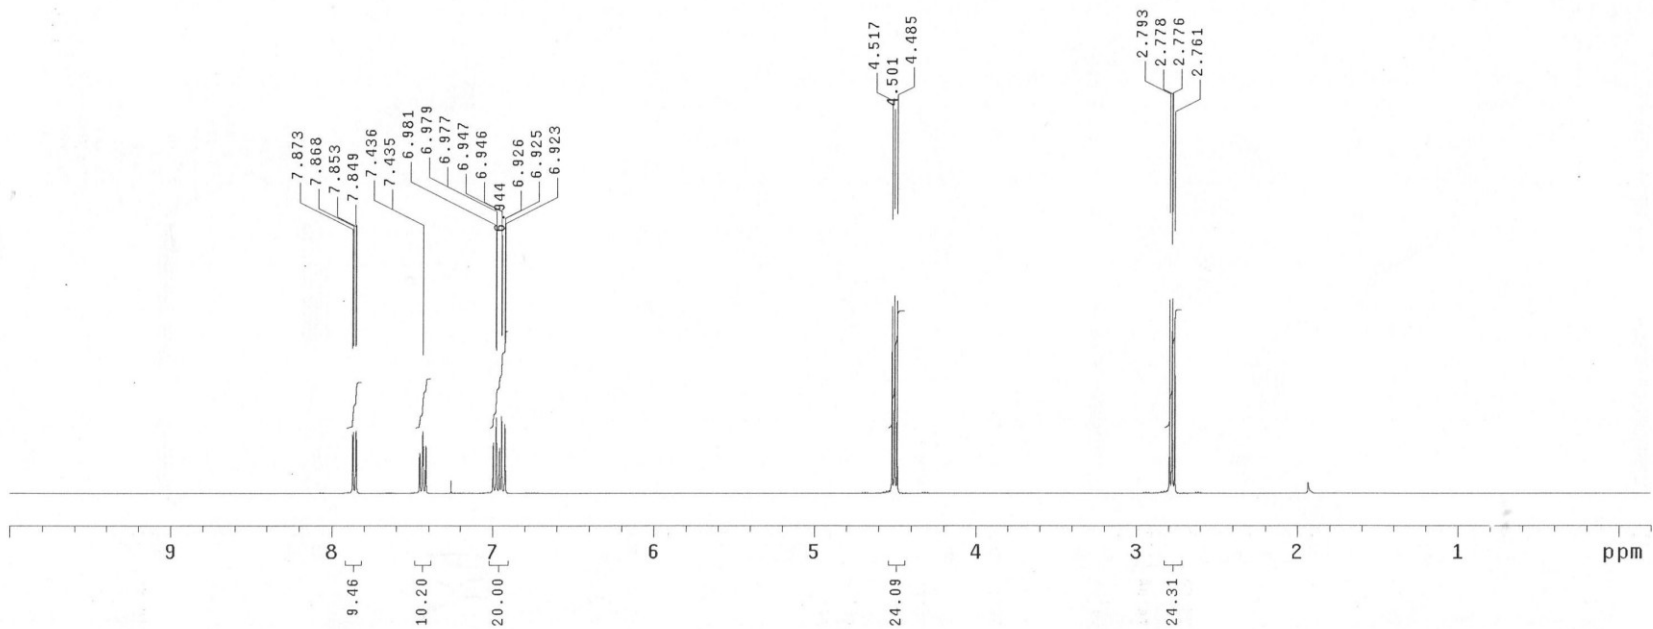

# Compound 7a (<sup>13</sup>C-NMR spectral data)

MC732

Pulse Sequence: s2pu1

UNITYplus-400 "unity400"

Date: Sep 6 2019

Solvent: CDC13

Ambient temperature

Total 2944 repetitions

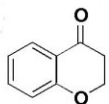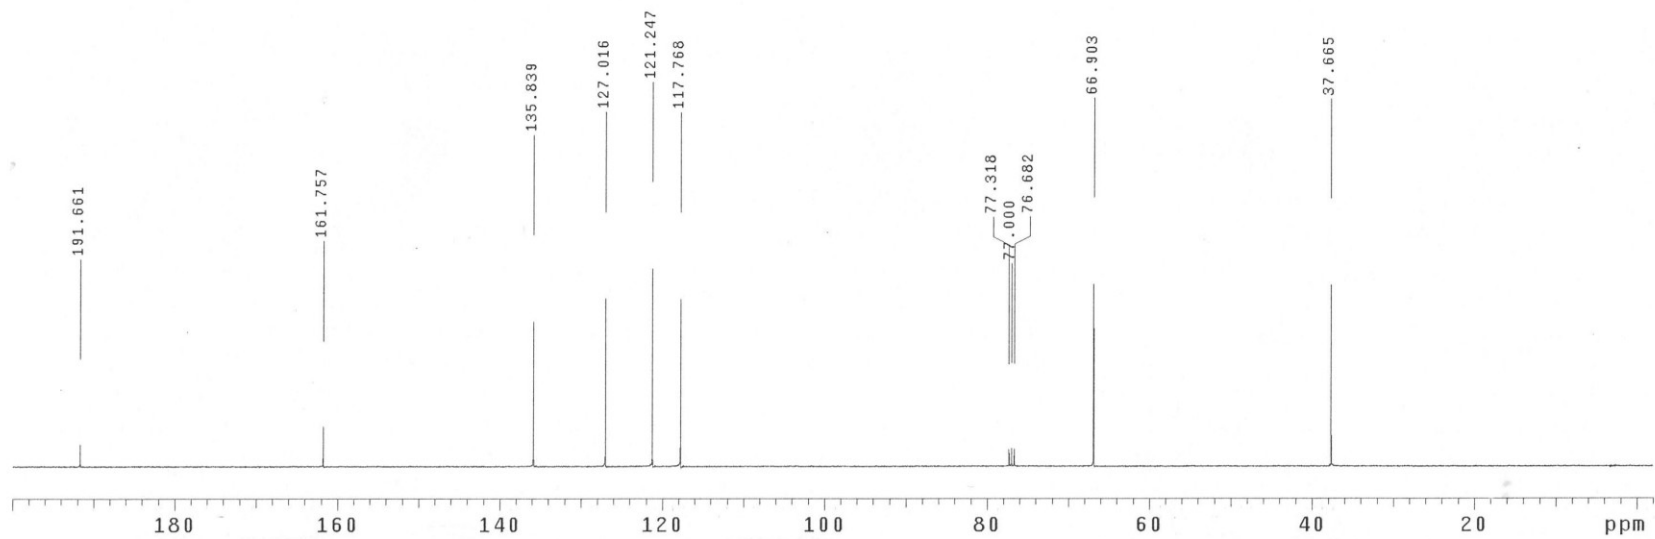

## X-ray crystal data of compound 4t (CCDC 1957347)

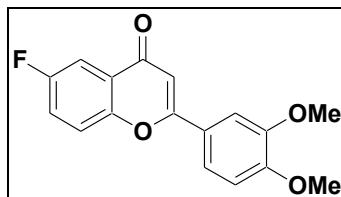

**Sample preparation** : A solution of compound **4t** (30 mg) in CH<sub>2</sub>Cl<sub>2</sub> (10 mL) was placed in a tube (10 mL). EtOAc (2 mL) was added slowly to the vial with a dropper. The vial was closed with little cotton and kept at room temperature for 2 days. Then, colorless prisms were observed.

**Crystal measurement** : X-ray crystal structures were determined with a Bruker Enraf-Nonius single-crystal diffractometer (CAD4, Kappa CCD). Thermal ellipsoids are drawn at 50% probability level.

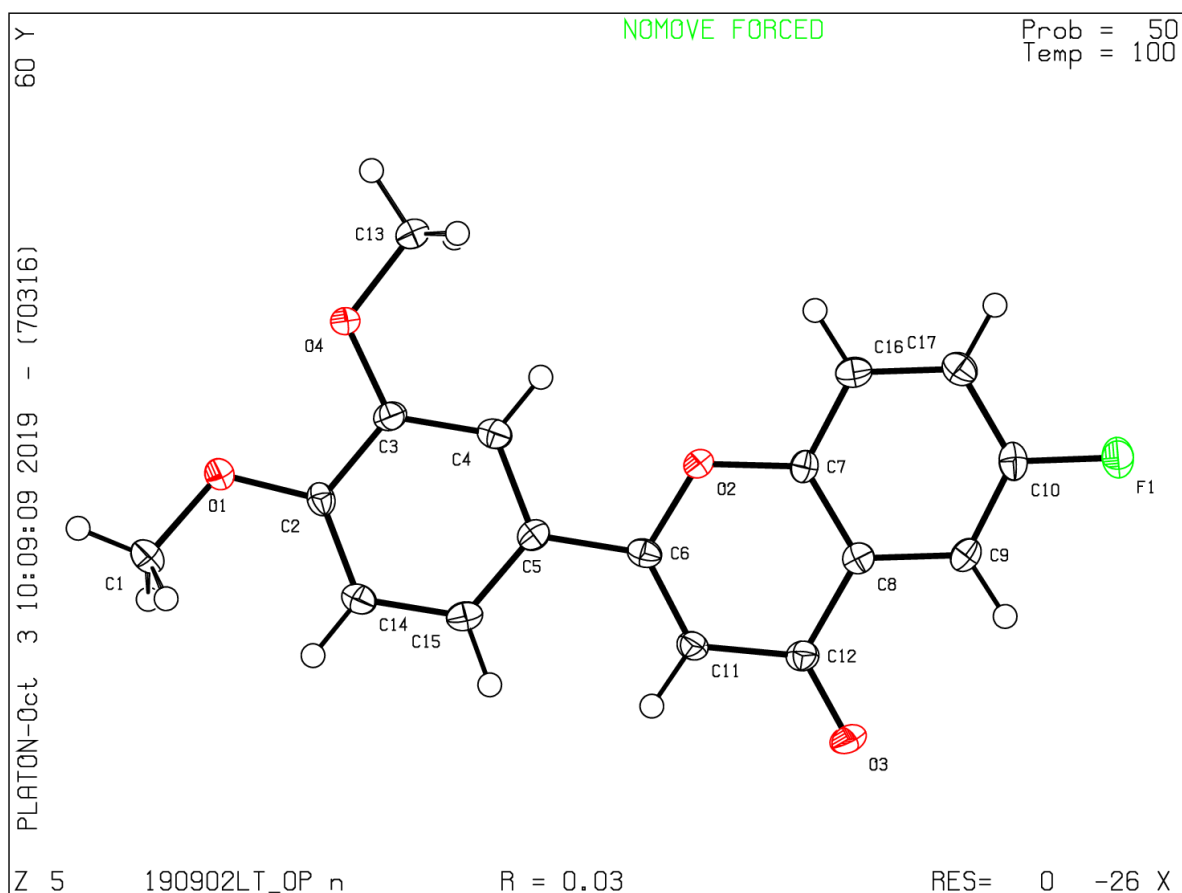

|                                   |                                                                                                                                  |
|-----------------------------------|----------------------------------------------------------------------------------------------------------------------------------|
| Empirical formula                 | C17 H13 F O4                                                                                                                     |
| Formula weight                    | 300.27                                                                                                                           |
| Temperature                       | 100(2) K                                                                                                                         |
| Wavelength                        | 0.71073 Å                                                                                                                        |
| Crystal system                    | Monoclinic                                                                                                                       |
| Space group                       | Pn                                                                                                                               |
| Unit cell dimensions              | a = 4.0051(3) Å $\alpha = 90^\circ$ .<br>b = 10.1298(8) Å $\beta = 92.222(3)^\circ$ .<br>c = 16.3327(12) Å $\gamma = 90^\circ$ . |
| Volume                            | 662.13(9) Å <sup>3</sup>                                                                                                         |
| Z                                 | 2                                                                                                                                |
| Density (calculated)              | 1.506 Mg/m <sup>3</sup>                                                                                                          |
| Absorption coefficient            | 0.116 mm <sup>-1</sup>                                                                                                           |
| F(000)                            | 312                                                                                                                              |
| Crystal size                      | 0.10 x 0.08 x 0.01 mm <sup>3</sup>                                                                                               |
| Theta range for data collection   | 2.010 to 26.380°.                                                                                                                |
| Index ranges                      | -4 ≤ h ≤ 5, -12 ≤ k ≤ 12, -20 ≤ l ≤ 13                                                                                           |
| Reflections collected             | 3830                                                                                                                             |
| Independent reflections           | 1987 [R(int) = 0.0207]                                                                                                           |
| Completeness to theta = 25.242°   | 99.2 %                                                                                                                           |
| Absorption correction             | Semi-empirical from equivalents                                                                                                  |
| Max. and min. transmission        | 0.7454 and 0.6849                                                                                                                |
| Refinement method                 | Full-matrix least-squares on F <sup>2</sup>                                                                                      |
| Data / restraints / parameters    | 1987 / 2 / 201                                                                                                                   |
| Goodness-of-fit on F <sup>2</sup> | 1.118                                                                                                                            |
| Final R indices [I > 2σ(I)]       | R1 = 0.0288, wR2 = 0.0799                                                                                                        |
| R indices (all data)              | R1 = 0.0307, wR2 = 0.0827                                                                                                        |
| Absolute structure parameter      | 0.3(4)                                                                                                                           |
| Extinction coefficient            | n/a                                                                                                                              |
| Largest diff. peak and hole       | 0.207 and -0.209 e.Å <sup>-3</sup>                                                                                               |
